# Supplementary material for: Styryl-based new organic chromophores bearing free amino and azomethine groups: synthesis, photophysical, NLO, and thermal properties
Source: publisher site journal article supplement (doi:10.3762/bjoc.16.189), 2020-09-14
Supplement: Additional file 1 [file 1860-5397-16-189-S1.pdf]

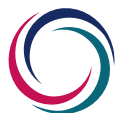

## Supporting Information

for

### **Styryl-based new organic chromophores bearing free amino and azomethine groups: synthesis, photophysical, NLO, and thermal properties**

Anka Utama Putra, Deniz Çakmaz, Nurgül Seferoğlu, Alberto Barsella  
and Zeynel Seferoğlu

*Beilstein J. Org. Chem.* **2020**, *16*, 2282–2296. doi:10.3762/bjoc.16.189

### **Additional experimental, photophysical, and calculated data**

## Table of Contents

| Contents                                                                                                | Page |
|---------------------------------------------------------------------------------------------------------|------|
| 1. Characterization data of dyes <b>4–7</b> and <b>9–12</b>                                             | S3   |
| 2. The spectroscopy of FTIR, $^1\text{H}$ NMR, $^{13}\text{C}$ NMR and HRMS spectra of dyes <b>3–12</b> | S9   |
| 2.1. FTIR, $^1\text{H}$ NMR, $^{13}\text{C}$ NMR and HRMS spectra of dye <b>3</b>                       | S9   |
| 2.2. FTIR, $^1\text{H}$ NMR, $^{13}\text{C}$ NMR and HRMS spectra of dye <b>4</b>                       | S11  |
| 2.3. FTIR, $^1\text{H}$ NMR, $^{13}\text{C}$ NMR and HRMS spectra of dye <b>5</b>                       | S13  |
| 2.4. FTIR, $^1\text{H}$ NMR, $^{13}\text{C}$ NMR and HRMS spectra of dye <b>6</b>                       | S15  |
| 2.5. FTIR, $^1\text{H}$ NMR, $^{13}\text{C}$ NMR and HRMS spectra of dye <b>7</b>                       | S17  |
| 2.6. FTIR, $^1\text{H}$ NMR, $^{13}\text{C}$ NMR and HRMS spectra of dye <b>8</b>                       | S19  |
| 2.7. FTIR, $^1\text{H}$ NMR, $^{13}\text{C}$ NMR and HRMS spectra of dye <b>9</b>                       | S21  |
| 2.8. FTIR, $^1\text{H}$ NMR, $^{13}\text{C}$ NMR and HRMS spectra of dye <b>10</b>                      | S23  |
| 2.9. FTIR, $^1\text{H}$ NMR, $^{13}\text{C}$ NMR and HRMS spectra of dye <b>11</b>                      | S25  |
| 2.10. FTIR, $^1\text{H}$ NMR, $^{13}\text{C}$ NMR and HRMS spectra of dye <b>12</b>                     | S27  |
| 3. Calculated data                                                                                      | S29  |
| 3.1. Optimized geometries of dyes <b>4–7</b> and <b>9–12</b>                                            | S29  |
| 3.2. The experimental and calculated photophysical properties of dyes <b>8–12</b>                       | S30  |
| 4. Photophysical properties of dyes <b>3–12</b>                                                         | S31  |
| 4.1. Relative quantum yield calculation formula                                                         | S31  |
| 4.2. Photoluminescence properties of dye <b>3</b>                                                       | S31  |
| 4.3. Photoluminescence properties of dye <b>4</b>                                                       | S33  |
| 4.4. Photoluminescence properties of dye <b>5</b>                                                       | S34  |
| 4.5. Photoluminescence properties of dye <b>6</b>                                                       | S36  |
| 4.6. Photoluminescence properties of dye <b>7</b>                                                       | S37  |
| 4.7. Photoluminescence properties of dye <b>8</b>                                                       | S39  |
| 4.8. Photoluminescence properties of dye <b>9</b>                                                       | S40  |
| 4.9. Photoluminescence properties of dye <b>10</b>                                                      | S42  |
| 4.10. Photoluminescence properties of dye <b>11</b>                                                     | S43  |
| 4.11. Photoluminescence properties of dye <b>12</b>                                                     | S45  |
| 5. Interaction of dyes <b>8–12</b> with hydroxide anion                                                 | S46  |
| 5.1. Interaction of dye <b>8</b> with hydroxide anion                                                   | S46  |
| 5.2. Interaction of dye <b>9</b> with hydroxide anion                                                   | S47  |
| 5.3. Interaction of dye <b>10</b> with hydroxide anion                                                  | S48  |
| 5.4. Interaction of dye <b>11</b> with hydroxide anion                                                  | S49  |
| 5.5. Interaction of dye <b>12</b> with hydroxide anion                                                  | S50  |
| 6. $pK_a$ calculation and pH properties of dye <b>8</b>                                                 | S52  |
| 7. The Frontier Orbitals of dyes <b>3–12</b>                                                            | S56  |
| 8. The Calculated NLO Properties of dyes <b>3–12</b>                                                    | S57  |

## 1. Characterization data of dyes

((*E*)-2-(1-(4-aminophenyl)-3-(4-(pyrrolidin-1-yl)phenyl)allylidene)malononitrile) (**4**)

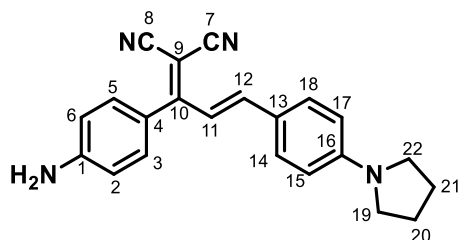

(Yield: 58 %, mp: 199-201 °C, dark green solid) FT-IR (cm<sup>-1</sup>): 3435, 3343, 3227, 2971, 2860, 2205, 1609, 1569, 1521, 1471. <sup>1</sup>H NMR (300 MHz, DMSO-*d*<sub>6</sub>) δ 7.52 (d, *J* = 8.5 Hz, 2H), 7.18 (m, 3H), 6.98 (d, *J* = 15.1 Hz, 1H), 6.67 (d, *J* = 8.3 Hz, 2H), 6.60 (d, *J* = 8.6 Hz, 2H), 6.01 (s, 2H), 3.34 (s, 4H), 1.98 (d, 4H). <sup>13</sup>C NMR (75 MHz, DMSO-*d*<sub>6</sub>) δ 171.7 (C10), 153.0 (C1), 150.5 (C16), 150.2 (C3-C5), 132.1 (C12), 131.8 (C11), 122.0 (C13), 120.2 (C4), 118.2 (C14-C18), 116.8 (C15-C17), 116.0 (C2-C6), 113.6 (C7), 112.6 (C8), 70.7 (C9), 47.9 (C19-C22), 25.4 (C20-C21). HR-MS (*m/z*), (M-H)<sup>+</sup>: C<sub>22</sub>H<sub>20</sub>N<sub>4</sub> calculated: 341.1766; found: 341.1777. Elemental analysis: anal. calcd. for C<sub>22</sub>H<sub>20</sub>N<sub>4</sub>; C, 77.62; H, 5.92; N, 16.46; found C, 77.58; H, 6.01; N, 16.48.

((*E*)-2-(1-(4-aminophenyl)-3-(4-(piperidin-1-yl)phenyl)allylidene)malononitrile) (**5**)

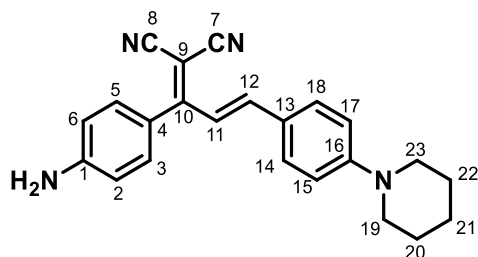

(Yield: 75 %, mp: 193-194 °C, black solid) FT-IR (cm<sup>-1</sup>): 3460, 3366, 3222, 2933, 2918, 2814, 2204, 1628, 1573, 1545, 1471. <sup>1</sup>H NMR (300 MHz, DMSO-*d*<sub>6</sub>) δ 7.50 (m, 2H), 7.20 (m, 3H), 6.96 (m, 3H), 6.66 (m, 2H), 6.05 (s, 2H), 3.39 (s, 4H), 1.57 (s, 6H). <sup>13</sup>C NMR (75 MHz, DMSO-*d*<sub>6</sub>) δ 171.7 (C10), 153.5 (C1), 153.4 (C16), 149.1 (C3-C5), 132.3 (C12), 131.2 (C11), 124.8 (C13), 120.6 (C4), 120.0 (C14-C18), 116.5 (C15-C17), 115.7 (C7), 114.5 (C8), 113.6 (C2-C6), 72.4 (C9), 66.3 (C19-C23), 47.3 (C20-C22), 44.6 (C21). HR-MS (*m/z*), (M-H)<sup>+</sup>: C<sub>23</sub>H<sub>22</sub>N<sub>4</sub> calculated: 355.1923; found: 355.1924. Elemental analysis: anal. calcd. for C<sub>23</sub>H<sub>22</sub>N<sub>4</sub>; C, 77.94; H, 6.26; N, 15.81; found C, 77.88; H, 6.21; N, 15.88.

((*E*)-2-(1-(4-aminophenyl)-3-(4-(morpholin-1-yl)phenyl)allylidene)malononitrile) (**6**)

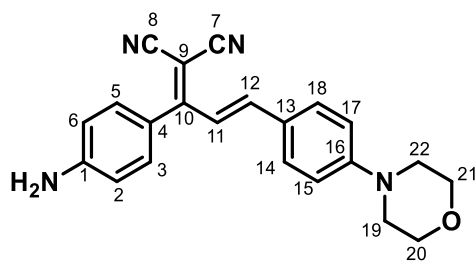

(Yield: 70 %, mp: 168-169 °C, red solid) FT-IR (cm<sup>-1</sup>): 3467, 3372, 3215, 3033, 2955, 2828, 2210, 1629, 1581, 1512, 1478. <sup>1</sup>H NMR (300 MHz, DMSO-*d*<sub>6</sub>) δ 7.57 (d, *J* = 8.6 Hz, 2H), 7.24 (m, 3H), 6.99 (m, 3H), 6.67 (d, *J* = 8.4 Hz, 2H), 6.09 (s, 2H), 3.72 (t, 4H), 3.29 (d, 4H). <sup>13</sup>C NMR (75 MHz, DMSO-*d*<sub>6</sub>) δ 171.7 (C10), 153.5 (C1), 153.4 (C16), 149.1 (C3-C5), 132.3 (C12), 131.2 (C11), 124.8 (C13), 120.6 (C4), 120.0 (C14-C18), 116.5 (C15-C17), 115.7 (C7), 114.5 (C8), 113.6 (C2-C6), 72.4 (C9), 66.3 (C20-C21), 47.3 (C19-C22). HR-MS (*m/z*), (M-H)<sup>+</sup>: C<sub>22</sub>H<sub>20</sub>N<sub>4</sub>O calculated: 357.1715; found: 357.1716. Elemental analysis: anal. calcd. for C<sub>22</sub>H<sub>20</sub>N<sub>4</sub>O; C, 74.14; H, 5.66; N, 15.72; found C, 74.18; H, 5.61; N, 15.81.

((*E*)-2-(1-(4-aminophenyl)-3-(4-(pyridin-1-yl)phenyl)allylidene)malononitrile) (**7**)

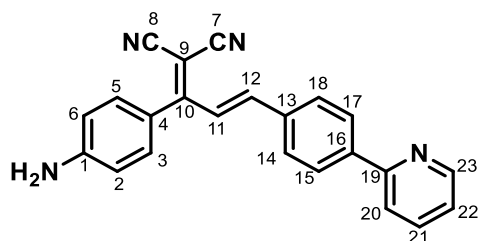

(Yield: 64 %, mp: 214-215 °C, orange solid) FT-IR (cm<sup>-1</sup>): 3488, 3384, 3221, 3036, 2211, 1597, 1512, 1476, 1463. <sup>1</sup>H NMR (300 MHz, DMSO-*d*<sub>6</sub>) δ 8.70 (m, 1H), 8.19 (d, *J* = 8.3 Hz, 2H), 8.05 (m, 1H), 7.91 (m, 1H), 7.84 (d, *J* = 8.4 Hz, 2H), 7.51 (d, *J* = 15.6 Hz, 1H), 7.37 (m, 3H), 7.17 (d, *J* = 15.6 Hz, 1H), 6.70 (m, 2H), 6.25 (s, 2H). <sup>13</sup>C NMR (75 MHz, DMSO-*d*<sub>6</sub>) δ 170.9 (C10), 155.3 (C19), 154.0 (C1), 150.2 (C23), 147.4 (C21), 141.2 (C16), 137.8 (C12), 135.6 (C11), 132.8 (C13), 129.6 (C15-C17), 127.6 (C3-C5), 125.8 (C14-C18), 123.7 (C4), 121.1 (C20), 119.6 (C22), 116.1 (C7), 115.2 (C8), 113.7 (C2-C6), 75.0 (C9). HR-MS (*m/z*), (M-H)<sup>+</sup>: C<sub>23</sub>H<sub>16</sub>N<sub>4</sub> calculated: 349.1453; found: 349.1458. Elemental analysis: anal. calcd. for C<sub>23</sub>H<sub>16</sub>N<sub>4</sub>; C, 79.29; H, 4.63; N, 16.08; found C, 79.27; H, 4.60; N, 16.11.

(2-((*E*)-1-(4-(((*E*)-2-hydroxybenzylidene)amino)phenyl)-3-(4-(pyrrolidin-1-yl)phenyl)allylidene)malononitrile) (**9**)

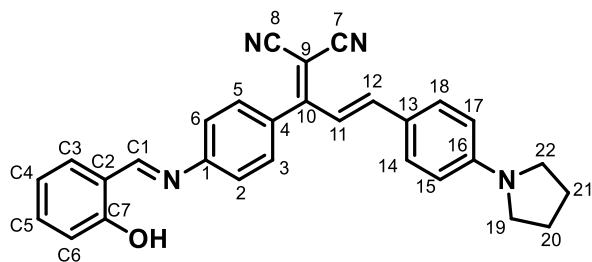

(Yield: 96 %, mp: 234-235 °C, green solid) FT-IR (cm<sup>-1</sup>): 3394 (broad), 3035, 2972, 2865, 2206, 1616, 1588, 1523, 1475. <sup>1</sup>H NMR (300 MHz, DMSO-*d*<sub>6</sub>) δ 12.81 (s, 1H), 9.06 (s, 1H), 7.71 (d, *J* = 7.7 Hz, 1H), 7.53 (m, 7H), 7.26 (d, *J* = 15.0 Hz, 1H), 7.01 (t, *J* = 8.0 Hz, 2H), 6.89 (d, *J* = 15.1 Hz, 1H), 6.60 (d, *J* = 8.5 Hz, 2H), 3.35 (s, 4H), 1.96 (s, 4H). <sup>13</sup>C NMR (75 MHz, DMSO-*d*<sub>6</sub>) δ 192.2, 165.2 (C10), 161.2 (C1'), 160.8 (C7'), 153.0 (C1), 150.5 (C16), 150.2 (C3-C5), 136.9 (C5'), 133.1 (C3'), 132.1 (C12), 131.8 (C11), 130.9, 129.7, 122.3 (C2'), 122.0 (C4'), 120.3 (C13), 119.9 (C4), 118.2 (C14-C18), 117.7, 117.2 C15-C17, 116.8 (C2-C6), 113.6 (C7), 112.8 (C8), 112.6 (C6'), 70.7 (C9), 47.9 (C19-C22), 25.3 (C20-C21). HR-MS (*m/z*), (M-H)<sup>+</sup>: C<sub>29</sub>H<sub>24</sub>N<sub>4</sub>O calculated: 453.1715; found: 453.1715. Elemental analysis: anal. calcd. for C<sub>29</sub>H<sub>24</sub>N<sub>4</sub>O; C, 78.36; H, 5.44; N, 12.60; found C, 78.27; H, 5.50; N, 12.61.

(2-((*E*)-1-(4-(((*E*)-2-hydroxybenzylidene)amino)phenyl)-3-(4-(piperidin-1-yl)phenyl)allylidene)malononitrile) (**10**)

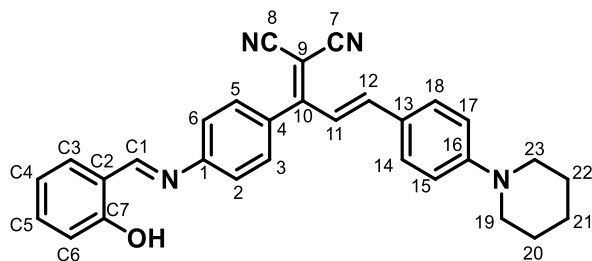

(Yield: 95 %, mp: 212-213 °C, black solid) FT-IR (cm<sup>-1</sup>): 3319 (broad), 3043, 2925, 2846, 2212, 1620, 1574, 1515, 1464. <sup>1</sup>H NMR (300 MHz, DMSO-*d*<sub>6</sub>) δ 12.80 (s, 1H), 9.06 (d, 1H), 7.71 (d, *J* = 7.5 Hz, 1H), 7.54 (m, 8H), 7.30 (dd, 1H), 6.95 (m, 4H), 3.41 (t, 4H), 1.57 (s, 6H). <sup>13</sup>C NMR (75 MHz, DMSO-*d*<sub>6</sub>) δ 171.0 (C10), 165.2 (C1'), 160.8 (C7'), 153.6 (C1), 150.8 (C16), 150.3 (C3-C5), 136.9 (C5'), 134.2 (C3'), 133.1 (C12), 132.3 (C11), 132.1 (C13), 131.0 (C2'), 123.5 (C4'), 123.0 (C4), 122.3 (C14-C18), 119.8 (C15-C17), 117.2 (C7), 115.4 (C8), 114.6 (C2-C6), 114.4 (C6'), 75.8 (C9), 48.1 (C19-C23), 25.4 (C20-C22), 24.4 (C21). HR-MS (*m/z*), (M-H)<sup>+</sup>: C<sub>30</sub>H<sub>26</sub>N<sub>4</sub>O calculated: 459.2185; found: 459.2175. Elemental analysis: anal. calcd. for C<sub>30</sub>H<sub>26</sub>N<sub>4</sub>O; C, 78.58; H, 5.72; N, 12.22; found C, 78.57; H, 5.70; N, 12.28.

(2-((*E*)-1-(4-(((*E*)-2-hydroxybenzylidene)amino)phenyl)-3-(4-(morpholin-1-yl)phenyl)allylidene)malononitrile) (**11**)

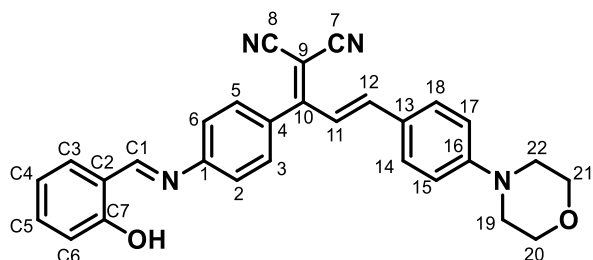

(Yield: 93 %, mp: 187-188 °C, red solid) FT-IR (cm<sup>-1</sup>): 3404 (broad), 3094, 2969, 2848, 2217, 2207, 1615, 1586, 1516, 1489. <sup>1</sup>H NMR (300 MHz, DMSO-*d*<sub>6</sub>) δ 12.79 (s, 1H), 9.07 (s, 1H), 7.71 (dd, 1H), 7.59 (q, 6H), 7.46 (m, 1H), 7.36 (d, *J* = 15.3 Hz, 1H), 6.97 (m, 5H), 3.71 (t, 4H), 3.31 (t, 4H). <sup>13</sup>C NMR (75 MHz, DMSO-*d*<sub>6</sub>) δ 192.2, 171.1 (C10), 165.2 (C1'), 160.8 (C7'), 153.8 (C1), 150.9 (C16), 150.1 (C3-C5), 136.9 (C5'), 134.2 (C3'), 133.1 (C12), 132.3, 132.1 (C11), 131.8 (C), 131.2 (C13), 131.0 (C4'), 129.6 (C6'), 124.4 (C4),

122.3 (C14-C18), 119.9 (C15-C17), 117.7 (C7), 117.2 (C8), 114.4 (C), 113.6 (C2-C6), 77.1 (C9), 66.3 (C20-C21), 47.3 (C19-C22). HR-MS ( $m/z$ ), (M-H)<sup>+</sup>: C<sub>29</sub>H<sub>24</sub>N<sub>4</sub>O<sub>2</sub> calculated: 461.1978; found: 461.1961. Elemental analysis: anal. calcd. for C<sub>29</sub>H<sub>24</sub>N<sub>4</sub>O<sub>2</sub>; C, 75.63; H, 5.25; N, 12.17; found C, 75.71; H, 5.30; N, 12.22.

(2-((*E*)-1-(4-(((*E*)-2-hydroxybenzylidene)amino)phenyl)-3-(4-(pyridin-1-yl)phenyl)allylidene)malononitrile) (**12**)

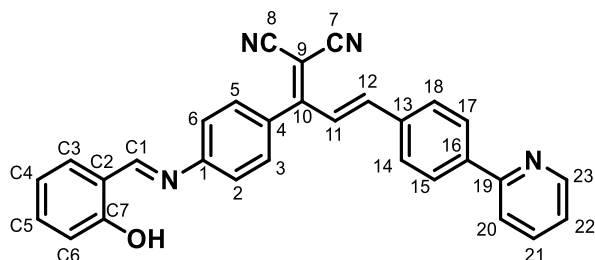

(Yield: 59 %, mp: 205-206 °C, orange solid) FT-IR (cm<sup>-1</sup>): 3600-3000 (broad), 3048, 2217, 1620, 1594, 1568, 1488, 1453. <sup>1</sup>H NMR (300 MHz, DMSO-*d*<sub>6</sub>) δ 12.77 (s, 1H), 9.08 (s, 1H), 8.70 (m, 1H), 8.21 (d, *J* = 8.2 Hz, 2H), 8.06 (d, *J* = 8.0 Hz, 1H), 7.90 (m, 3H), 7.73 (m, 1H), 7.66 (m, 5H), 7.48 (m, 1H), 7.41 (m, 1H), 7.12 (s, 1H), 7.03 (m, 3H). <sup>13</sup>C NMR (75 MHz, DMSO-*d*<sub>6</sub>) δ 192.2, 191.6, 165.3 (C10), 160.8 (C1'), 155.2 (C7'), 154.0 (C19), 150.2 (C1), 149.6 (C23), 137.9 (C21), 136.9 (C5'), 133.1 (C21), 132.8 (C16), 131.2 (C3'), 130.7 (C12), 130.0 (C11), 129.6 (C13), 129.4 (C15-C17), 129.1 (C3-C5), 127.6 (C2'), 127.6 (C14-C18), 127.0 (C4), 122.5 (C20), 119.9 (C4'), 119.8 (C22), 119.4 (C6'), 117.7 (C7), 117.2 (C8), 113.7 (C2-C6), 113.1, 95.7 (C9). HR-MS ( $m/z$ ), (M-H)<sup>+</sup>: C<sub>30</sub>H<sub>20</sub>N<sub>4</sub>O calculated: 453.1715; found: 453.1715. Elemental analysis: anal. calcd. for C<sub>30</sub>H<sub>20</sub>N<sub>4</sub>O; C, 79.63; H, 4.46; N, 12.38; found C, 79.74; H, 4.49; N, 12.42.



## 2. The spectroscopy of FTIR, $^1\text{H}$ NMR, $^{13}\text{C}$ NMR and HRMS spectra of dyes 3-12

### 2.1. FTIR, $^1\text{H}$ NMR, $^{13}\text{C}$ NMR and HRMS spectra of dye 3

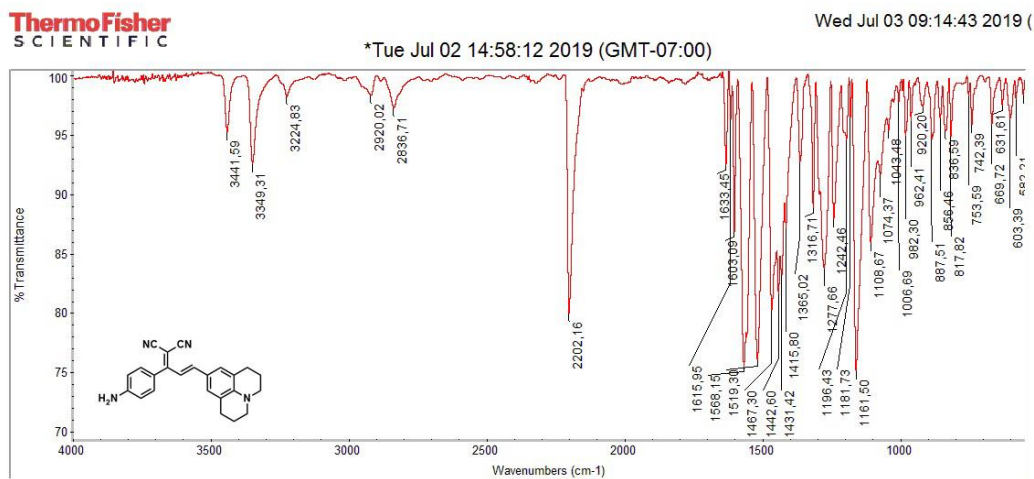

Figure S1: FTIR spectrum of dye 3.

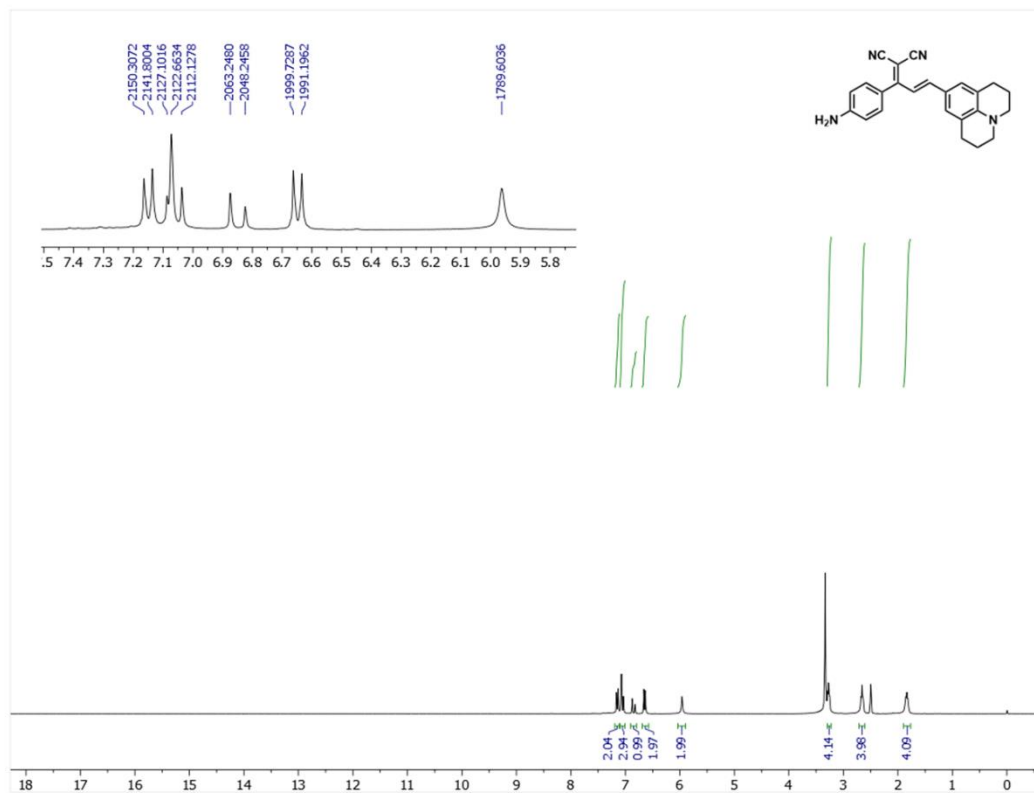

Figure S2:  $^1\text{H}$  NMR spectrum of dye 3 in  $\text{DMSO}-d_6$ .

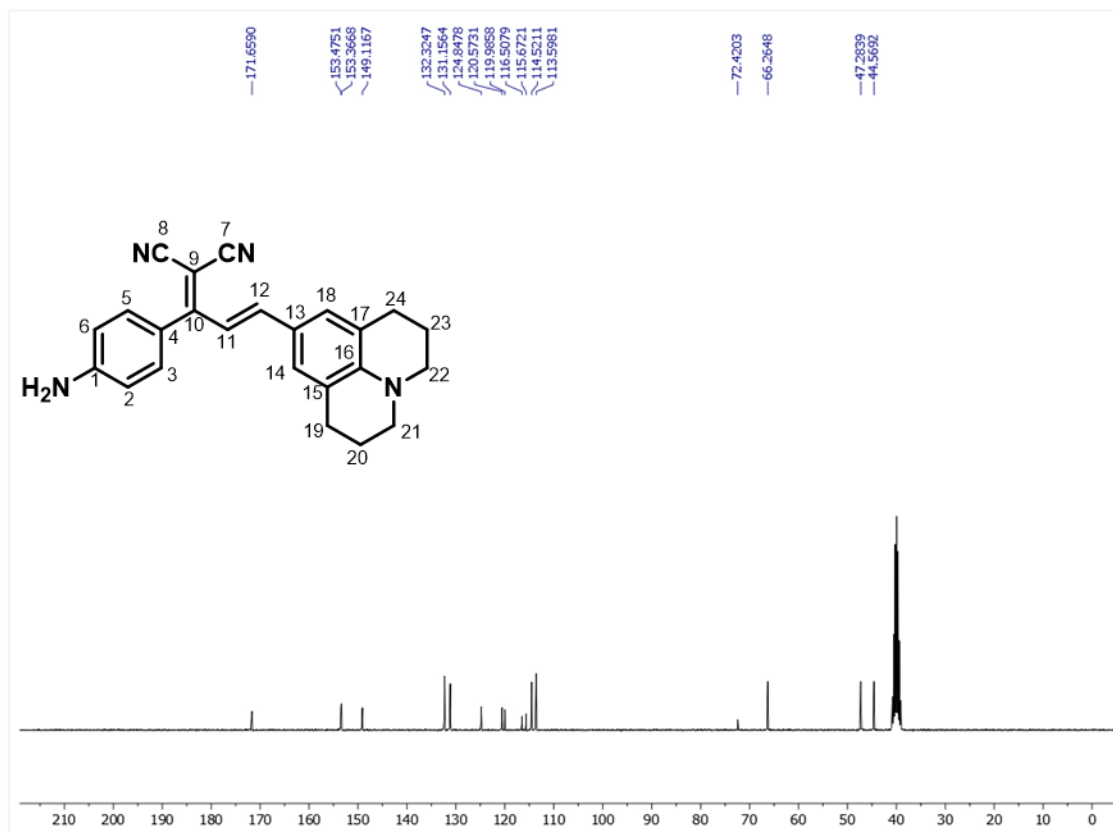

**Figure S3:**  $^{13}\text{C}$  NMR spectrum of dye **3** in  $\text{DMSO}-d_6$ .

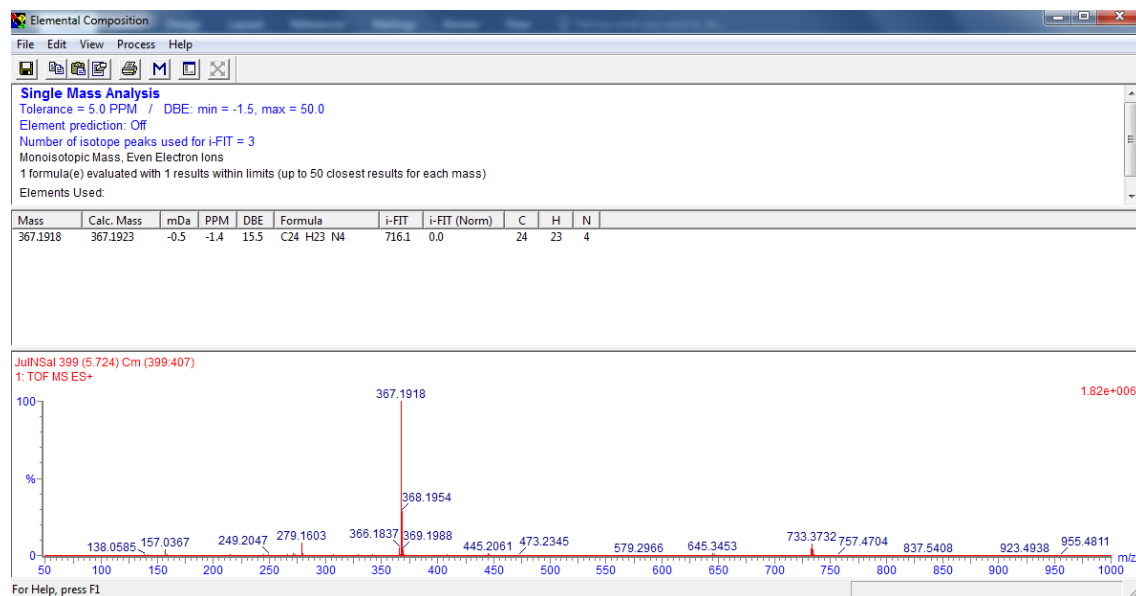

**Figure S4:** HRMS spectrum of dye **3**.

## 2.2. FTIR, $^1\text{H}$ NMR, $^{13}\text{C}$ NMR and HRMS spectra of dye 4

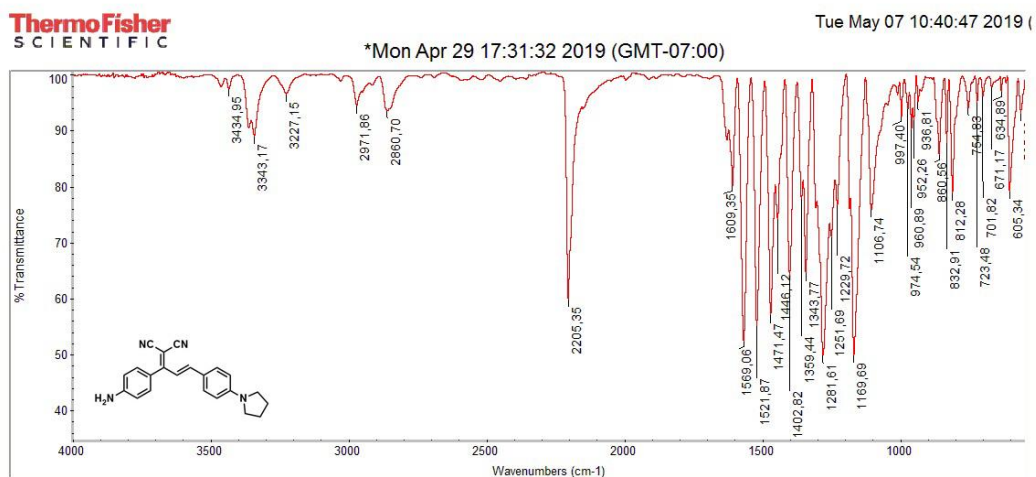

Figure S5: FTIR spectrum of dye 4.

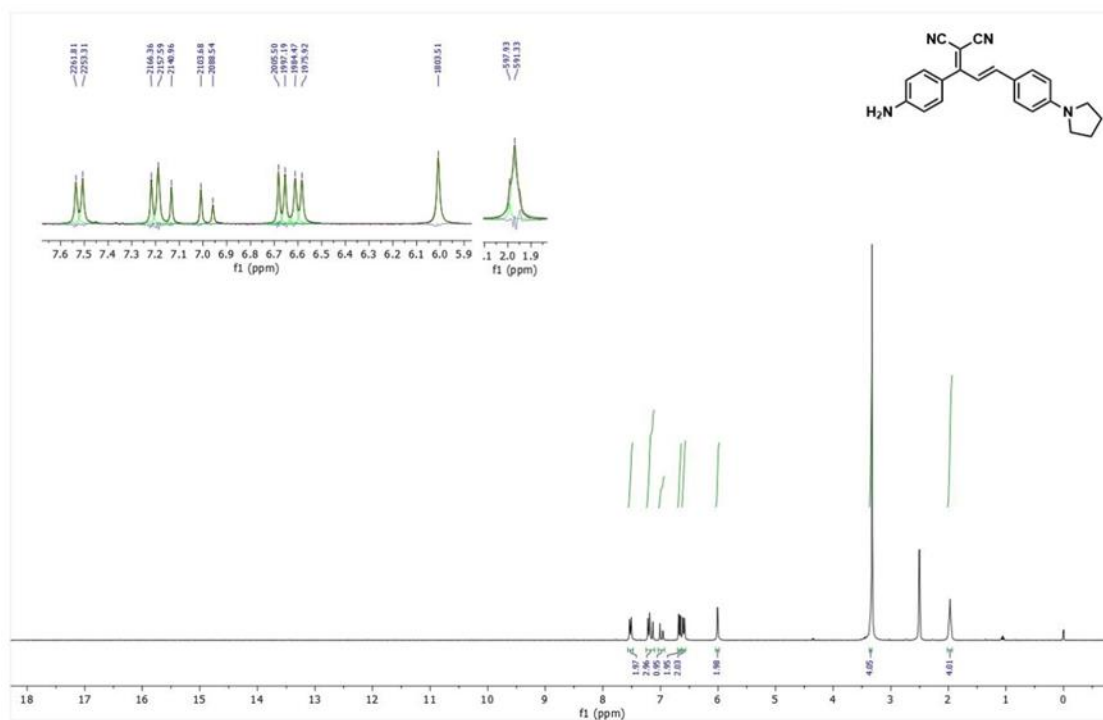

Figure S6:  $^1\text{H}$  NMR spectrum dye 4 in  $\text{DMSO}-d_6$ .

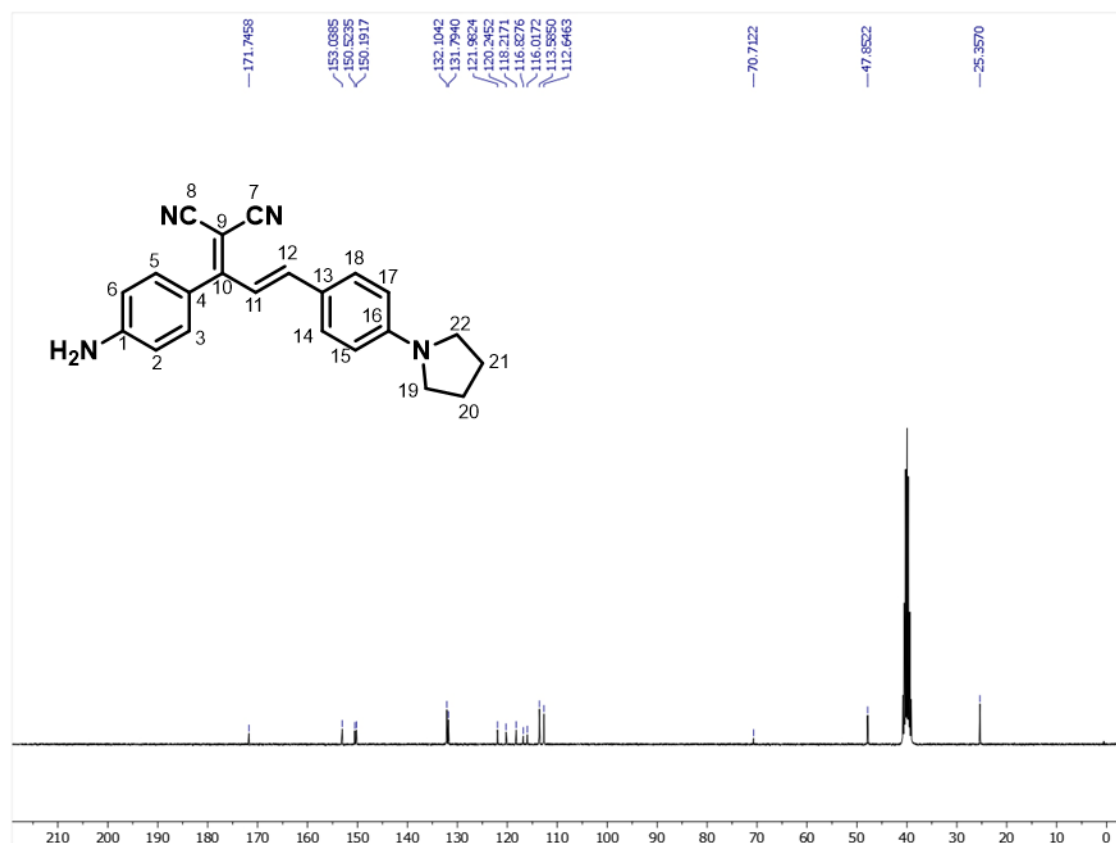

**Figure S7:**  $^{13}\text{C}$  NMR spectrum of dye 4 in  $\text{DMSO}-d_6$ .

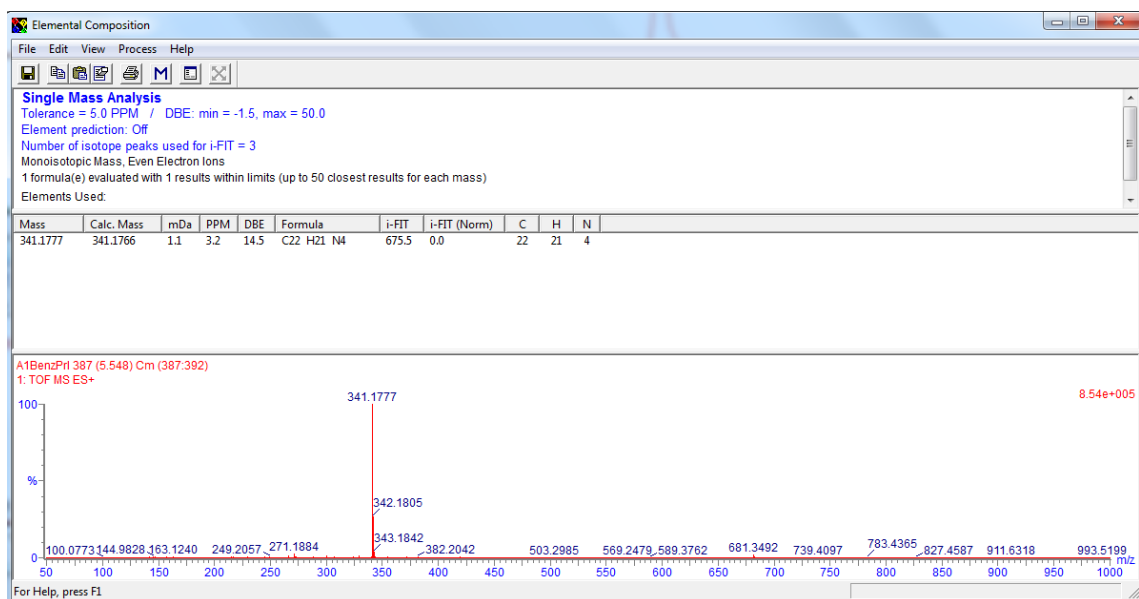

**Figure S8:** HRMS spectrum of dye 4.

## 2.3. FTIR, $^1\text{H}$ NMR, $^{13}\text{C}$ NMR and HRMS spectra of dye 5

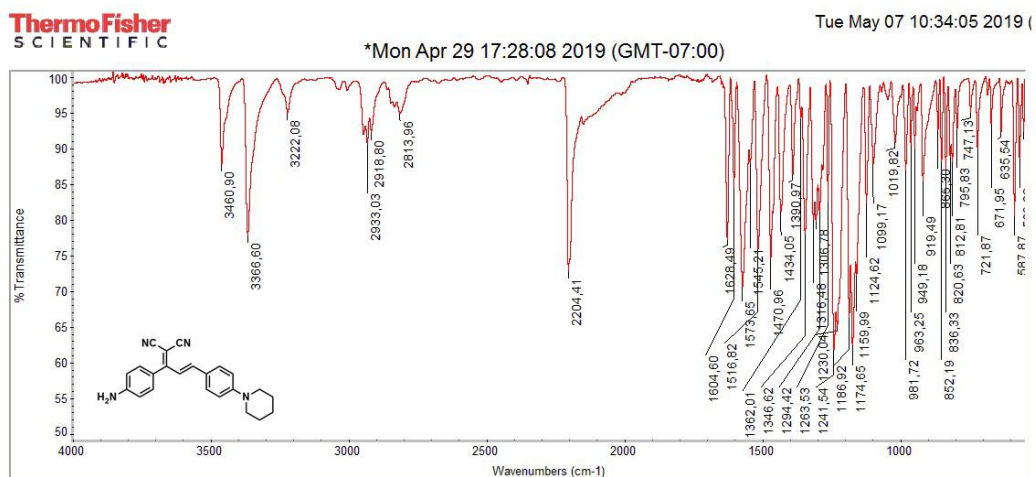

Figure S9: FTIR spectrum of dye 5.

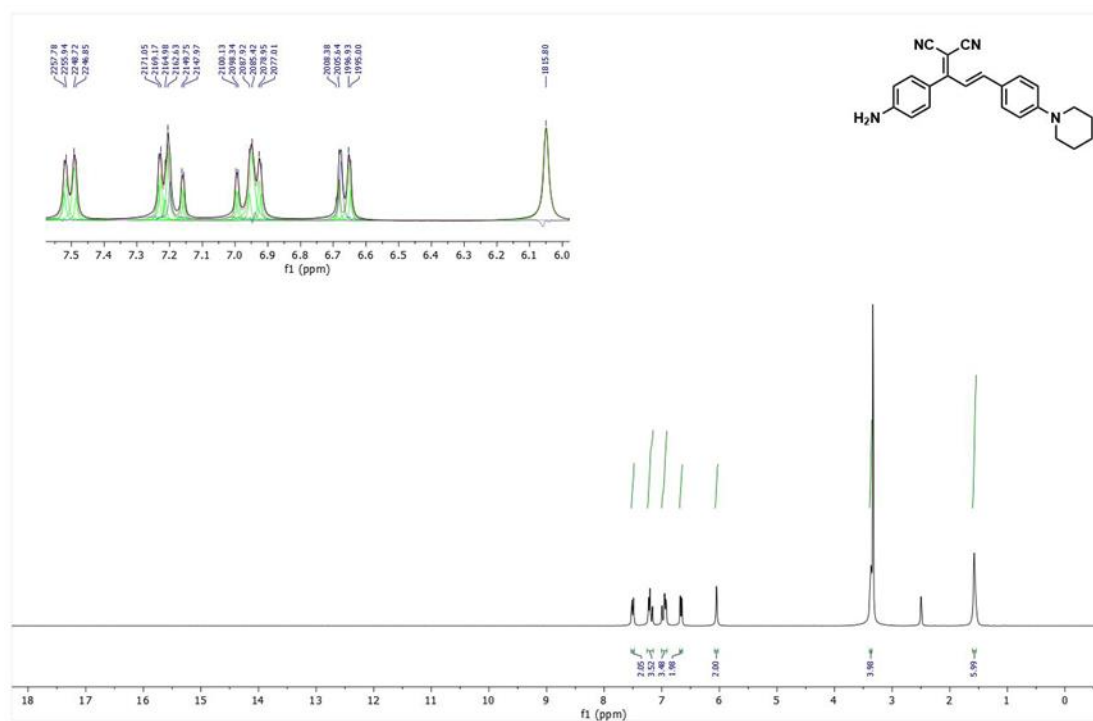

Figure S10:  $^1\text{H}$  NMR spectrum of dye 5 in  $\text{DMSO}-d_6$ .

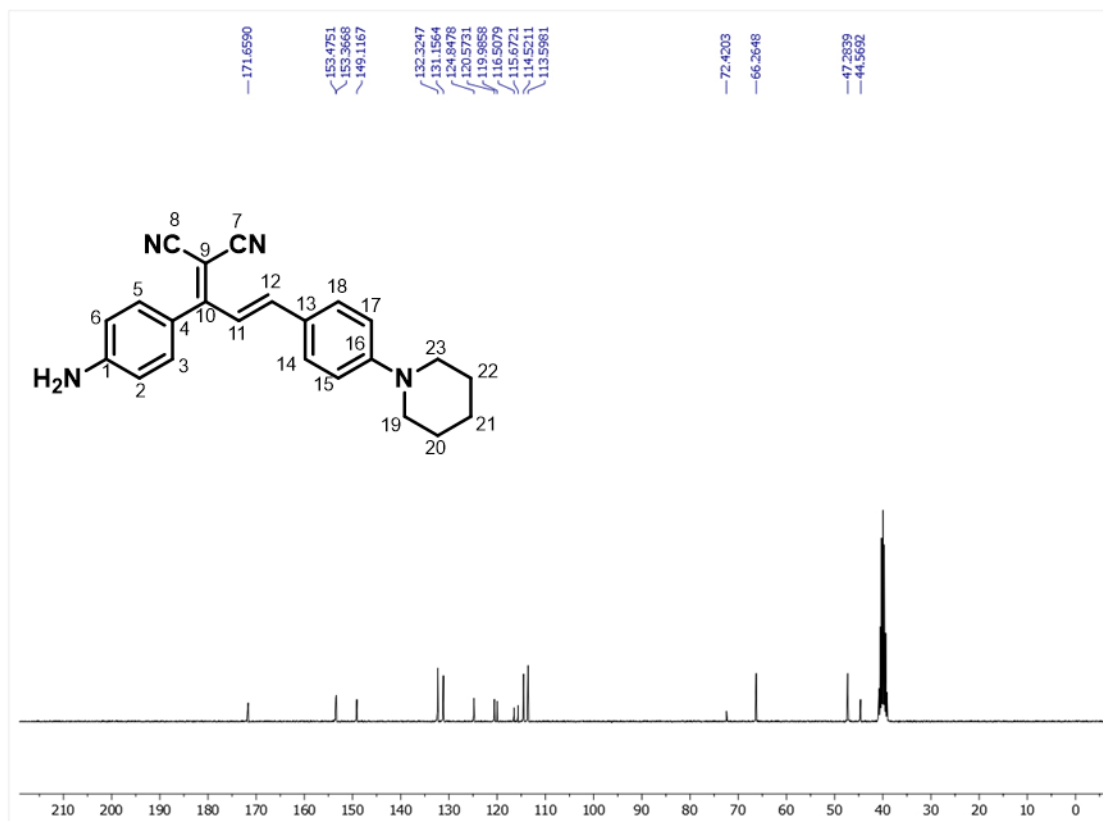

**Figure S11:**  $^{13}\text{C}$  NMR spectrum of dye 5 in  $\text{DMSO}-d_6$ .

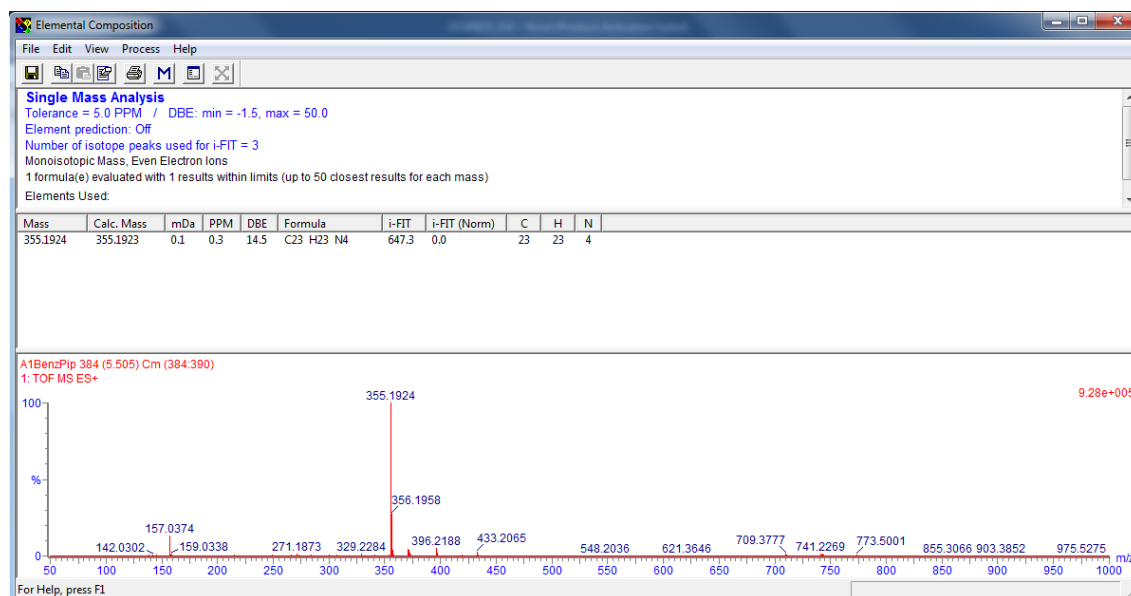

**Figure S12:** HRMS spectrum of dye 5.

## 2.4. FTIR, $^1\text{H}$ NMR, $^{13}\text{C}$ NMR and HRMS spectra of dye 6

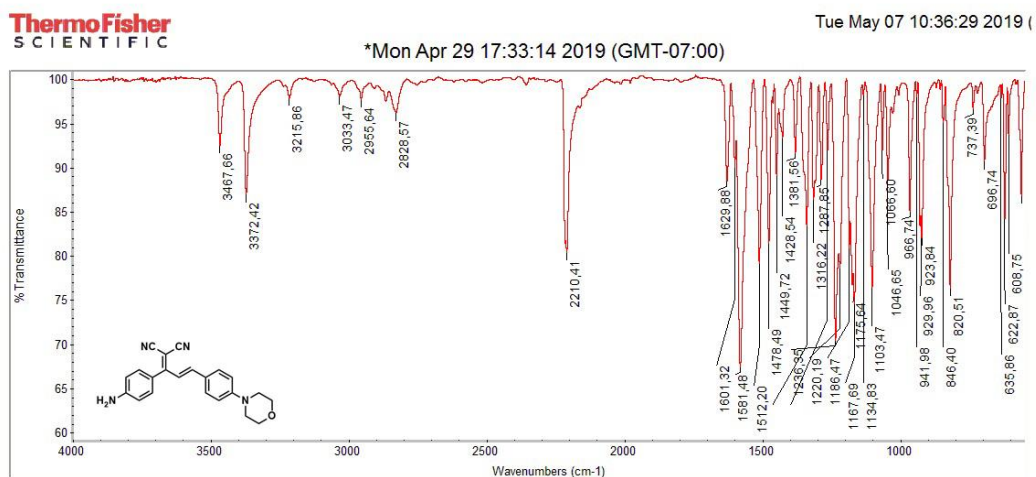

Figure S13: FTIR spectrum of dye 6.

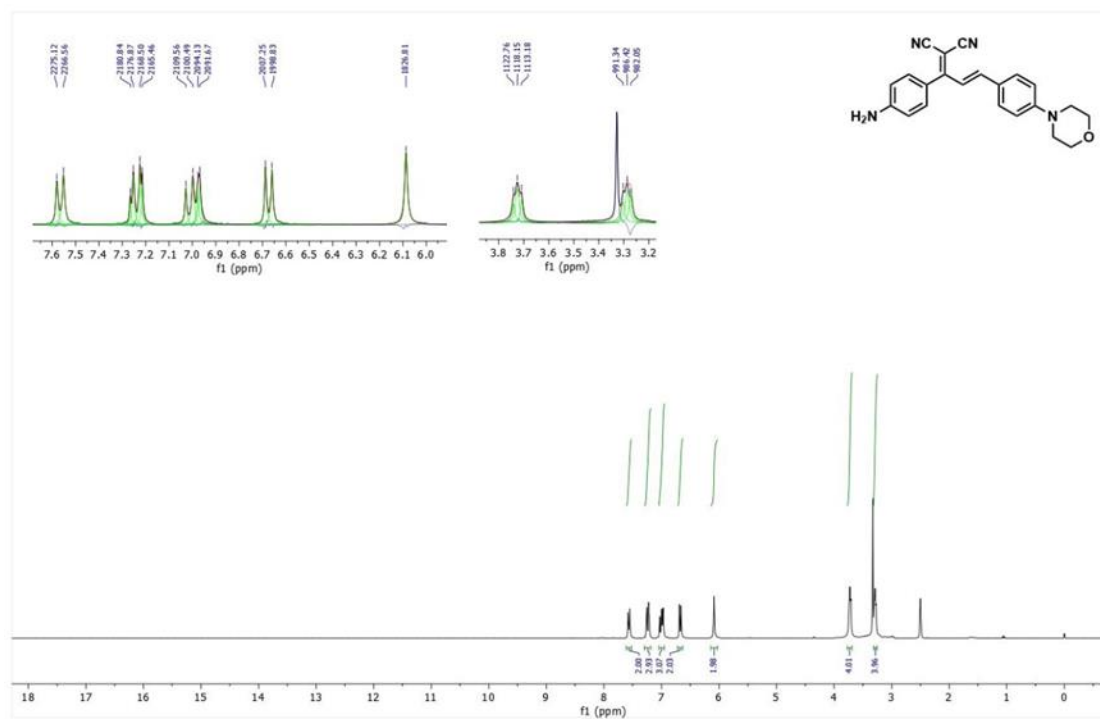

Figure S14:  $^1\text{H}$  NMR spectrum of dye 6 in  $\text{DMSO}-d_6$ .

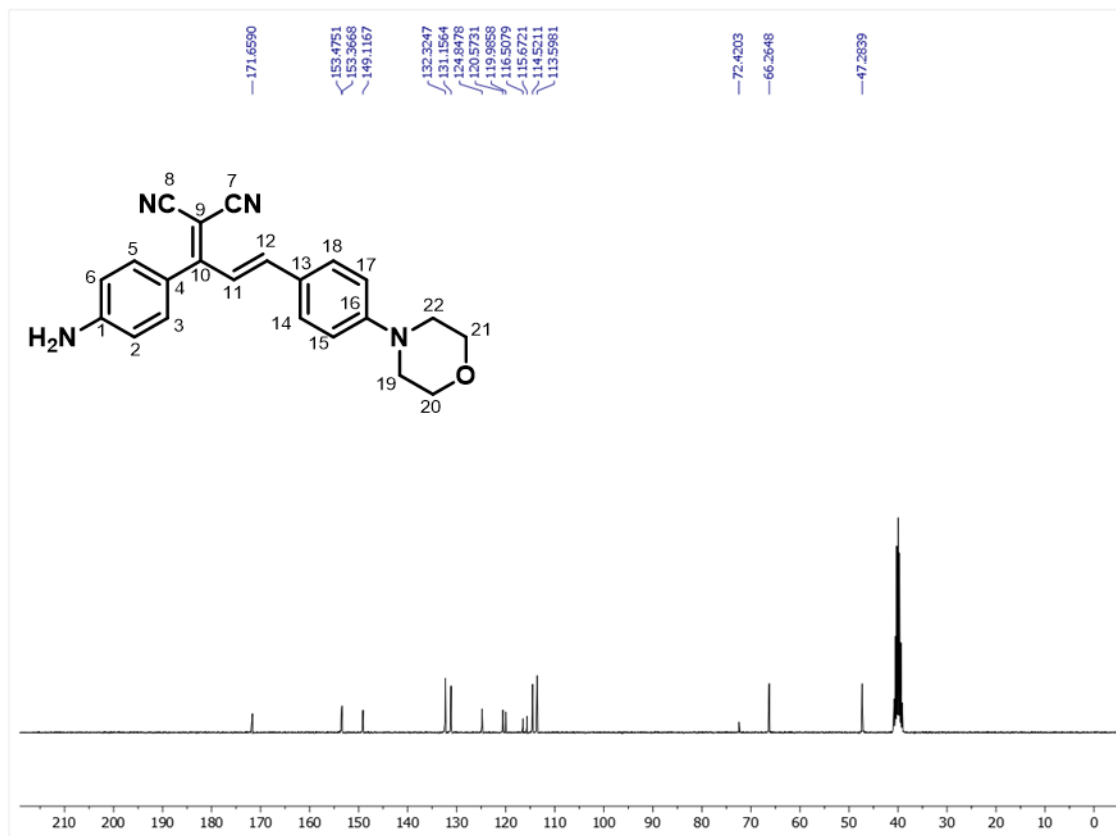

**Figure S15:**  $^{13}\text{C}$  NMR spectrum of dye 6 in  $\text{DMSO}-d_6$ .

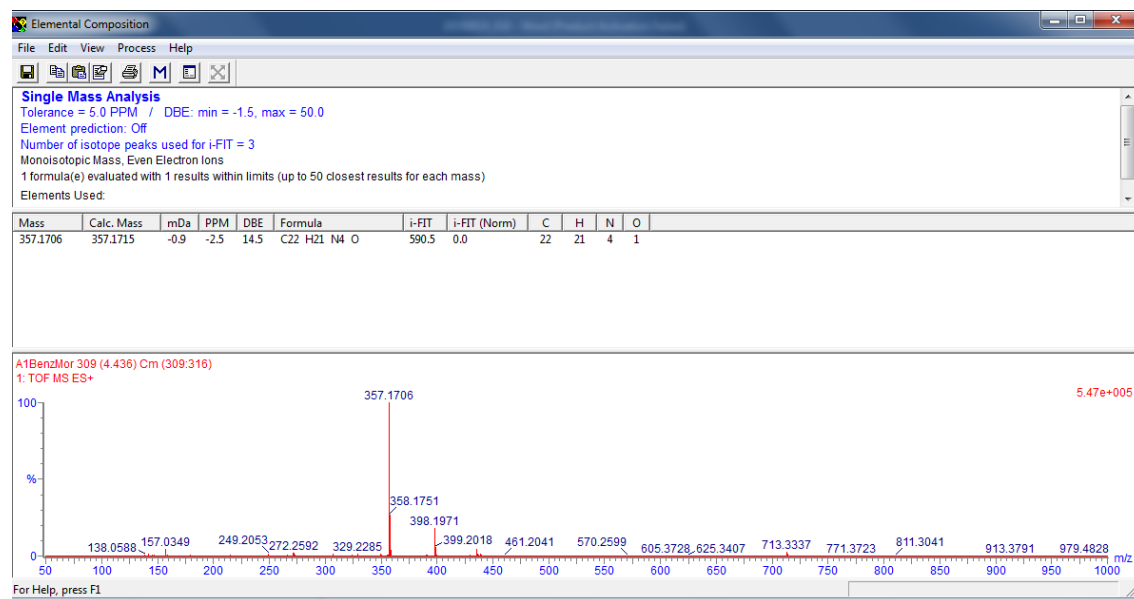

**Figure S16:** HRMS spectrum of dye 6.



## 2.5. FTIR, $^1\text{H}$ NMR, $^{13}\text{C}$ NMR and HRMS spectra of dye 7

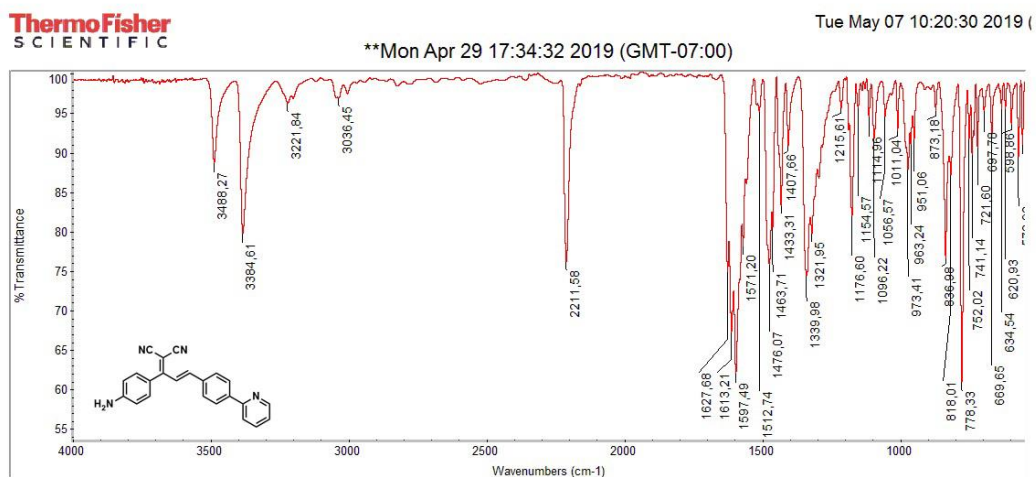

Figure S17: FTIR spectrum of dye 7.

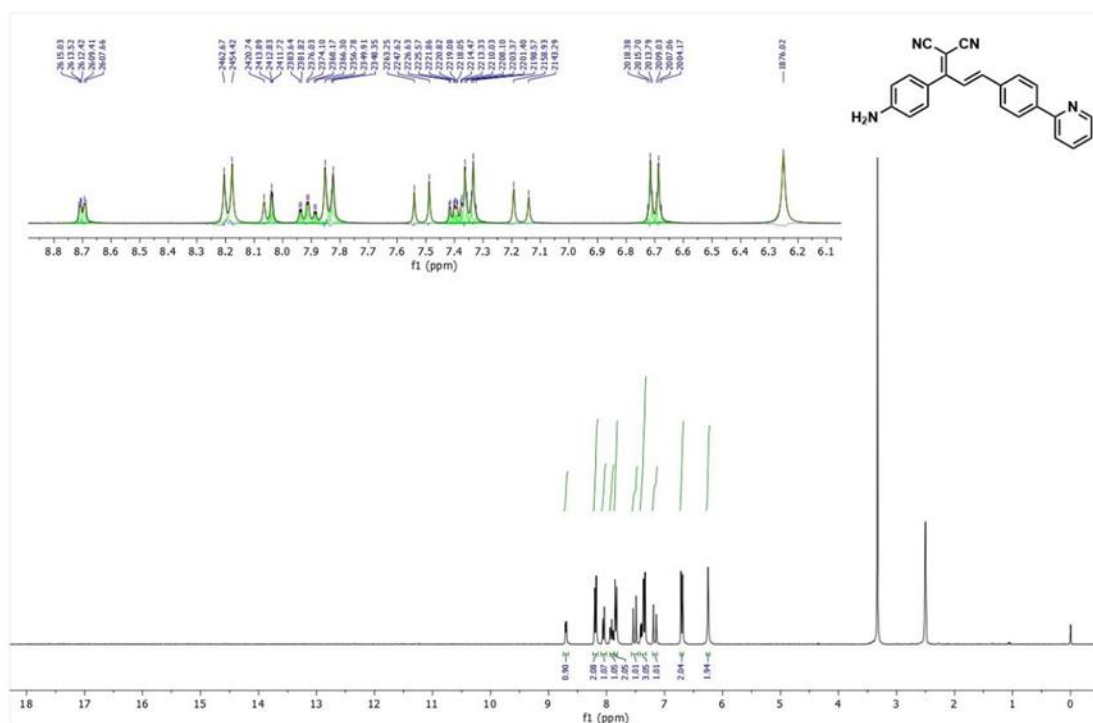

Figure S18:  $^1\text{H}$  NMR spectrum of dye 7 in  $\text{DMSO}-d_6$ .

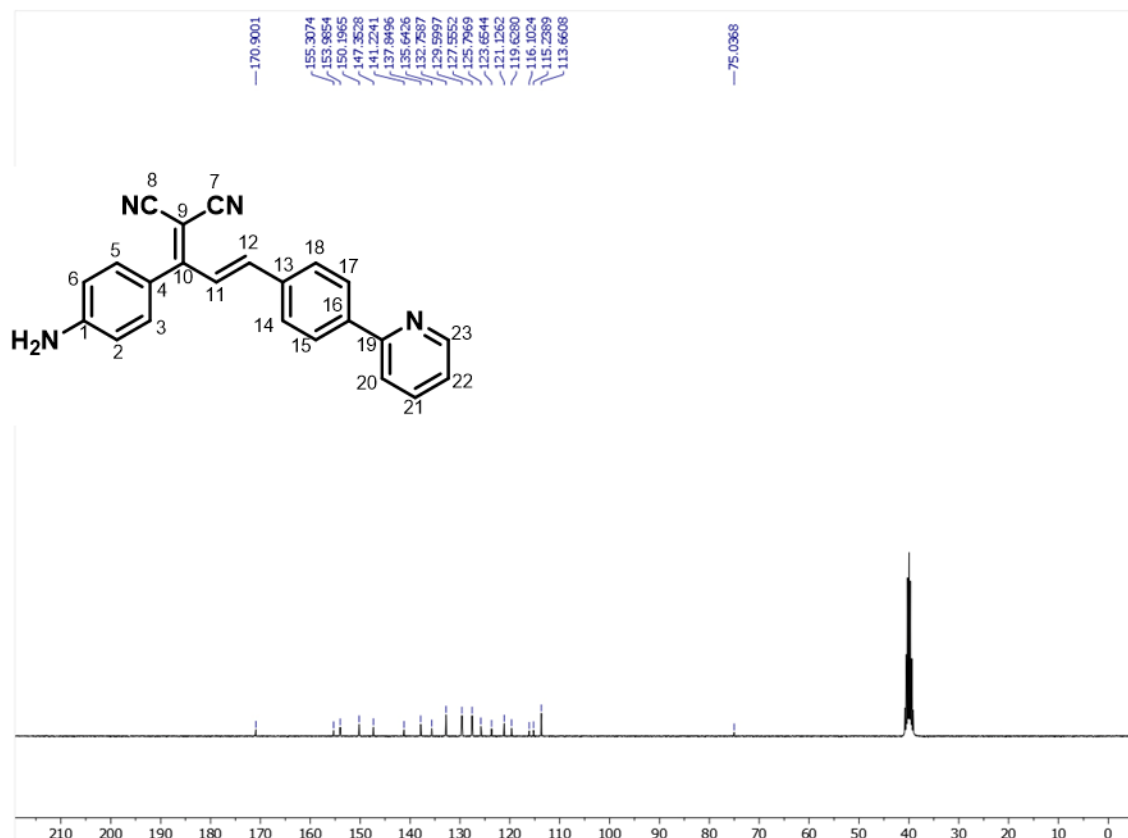

**Figure S19:**  $^{13}\text{C}$  NMR spectrum of dye 7 in  $\text{DMSO}-d_6$ .

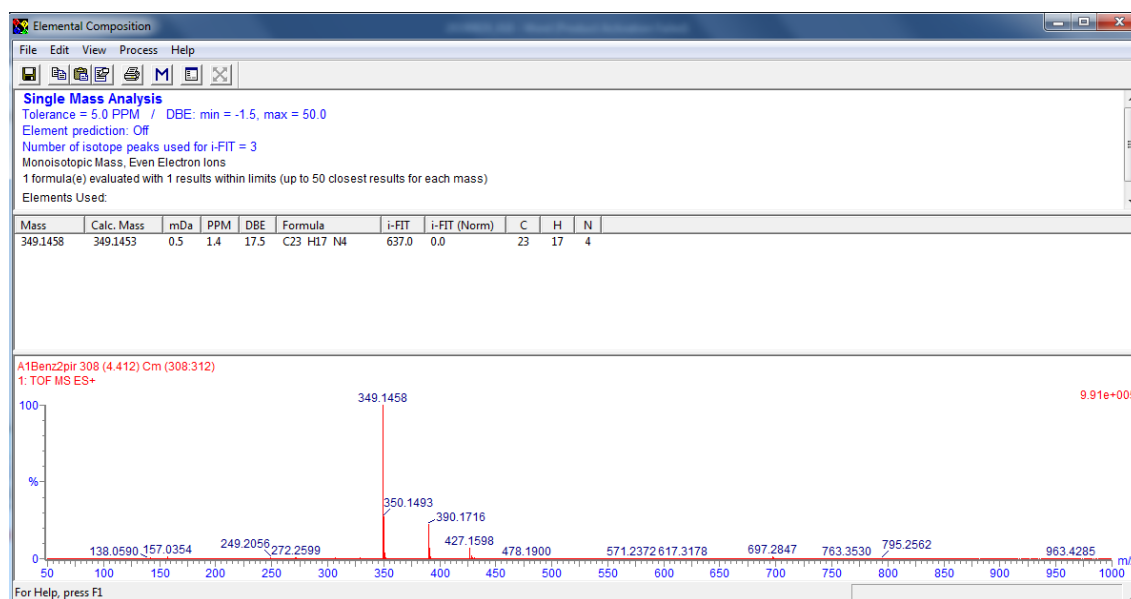

**Figure S20:** HRMS spectrum of dye 7.

## 2.6. FTIR, <sup>1</sup>H NMR, <sup>13</sup>C NMR and HRMS spectra of dye 8

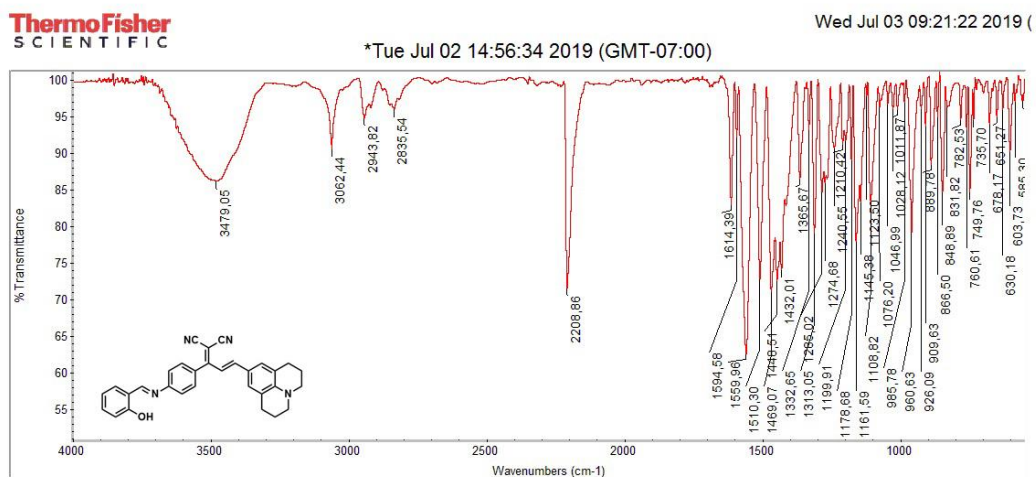

**Figure S21:** FTIR spectrum of dye 8.

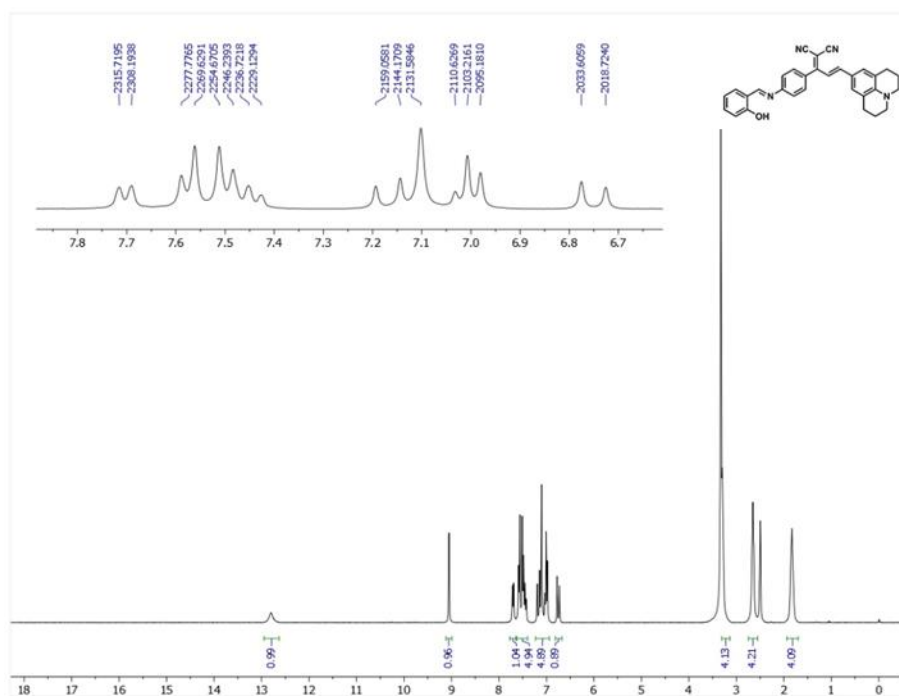

**Figure S22:**  $^1\text{H}$  NMR spectrum of dye **8** in  $\text{DMSO}-d_6$ .

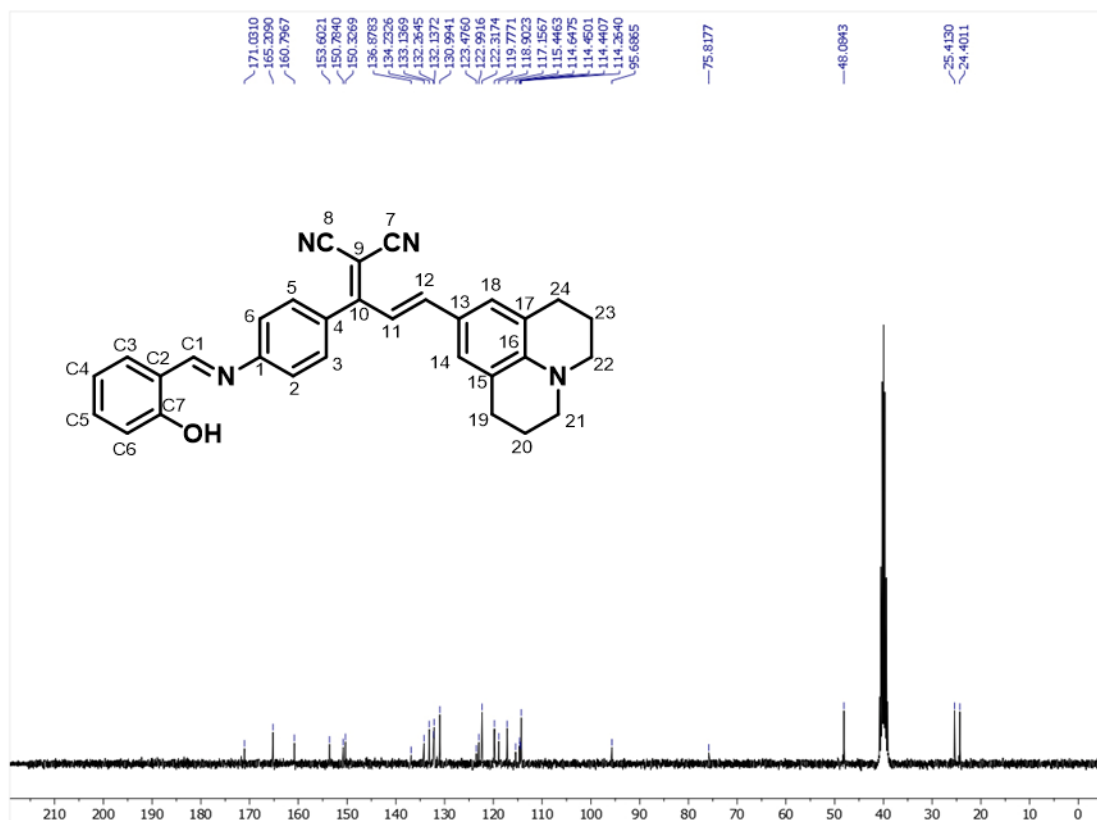

**Figure S23:**  $^{13}\text{C}$  NMR spectrum of dye **8** in  $\text{DMSO}-d_6$ .

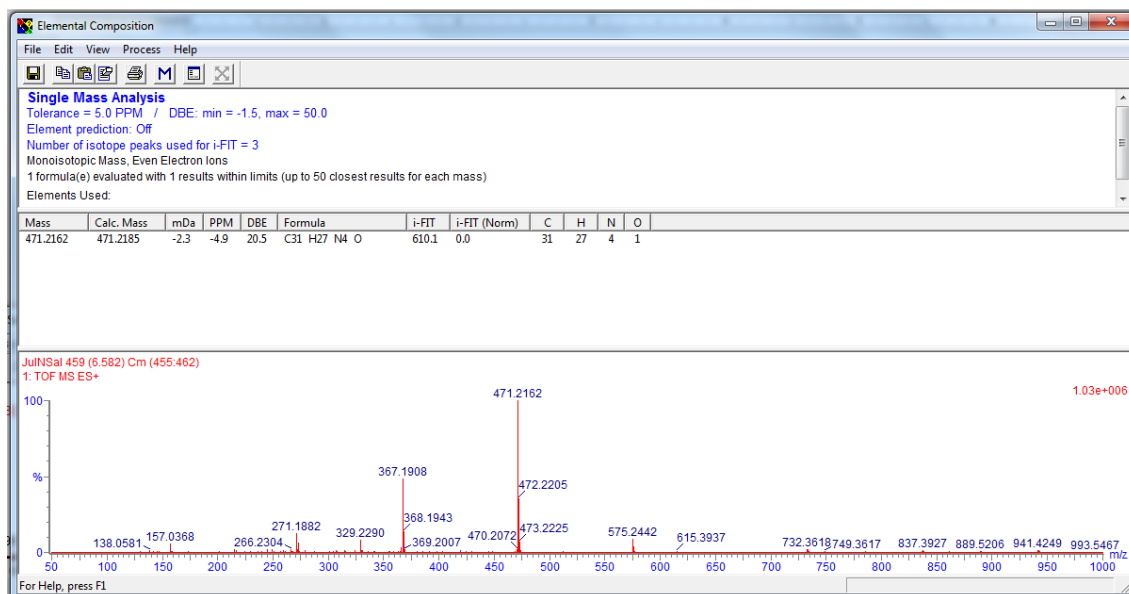

**Figure S24:** HRMS spectrum of dye **8**.

## 2.7. FTIR, $^1\text{H}$ NMR, $^{13}\text{C}$ NMR and HRMS spectra of dye 9

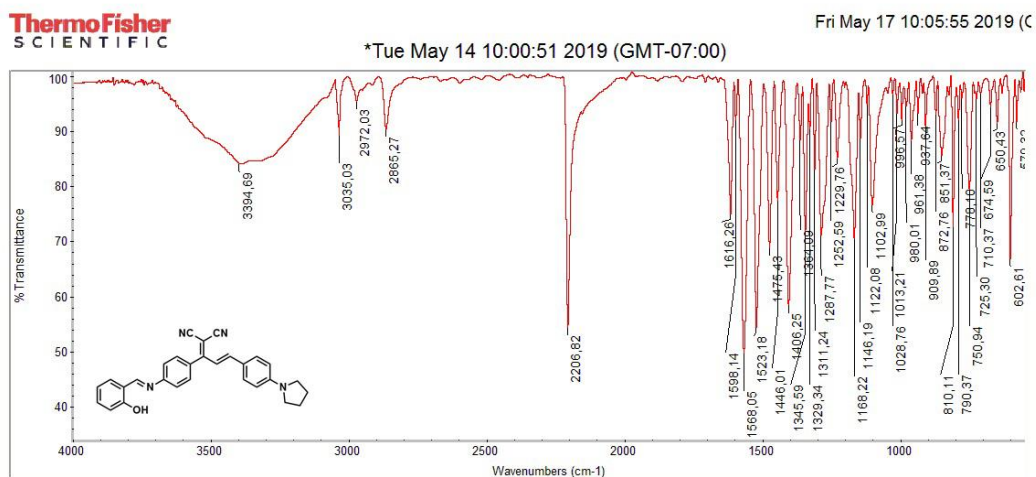

Figure S25: FTIR spectrum of dye 9.

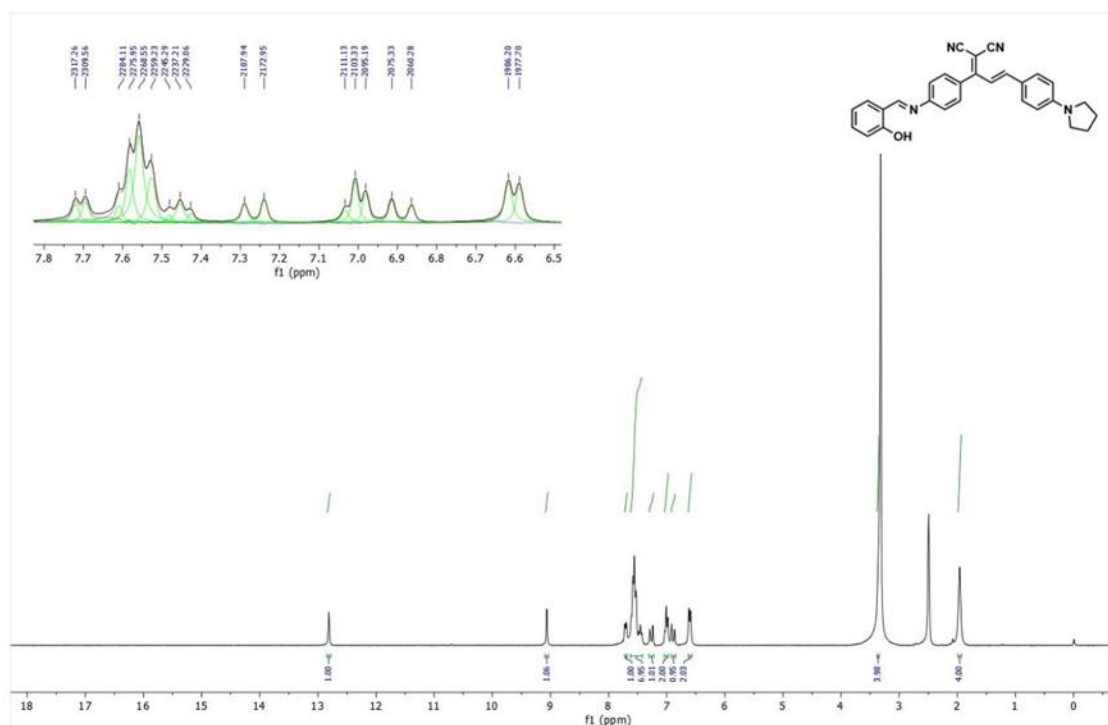

Figure S26:  $^1\text{H}$  NMR spectrum of dye 9 in  $\text{DMSO}-d_6$ .

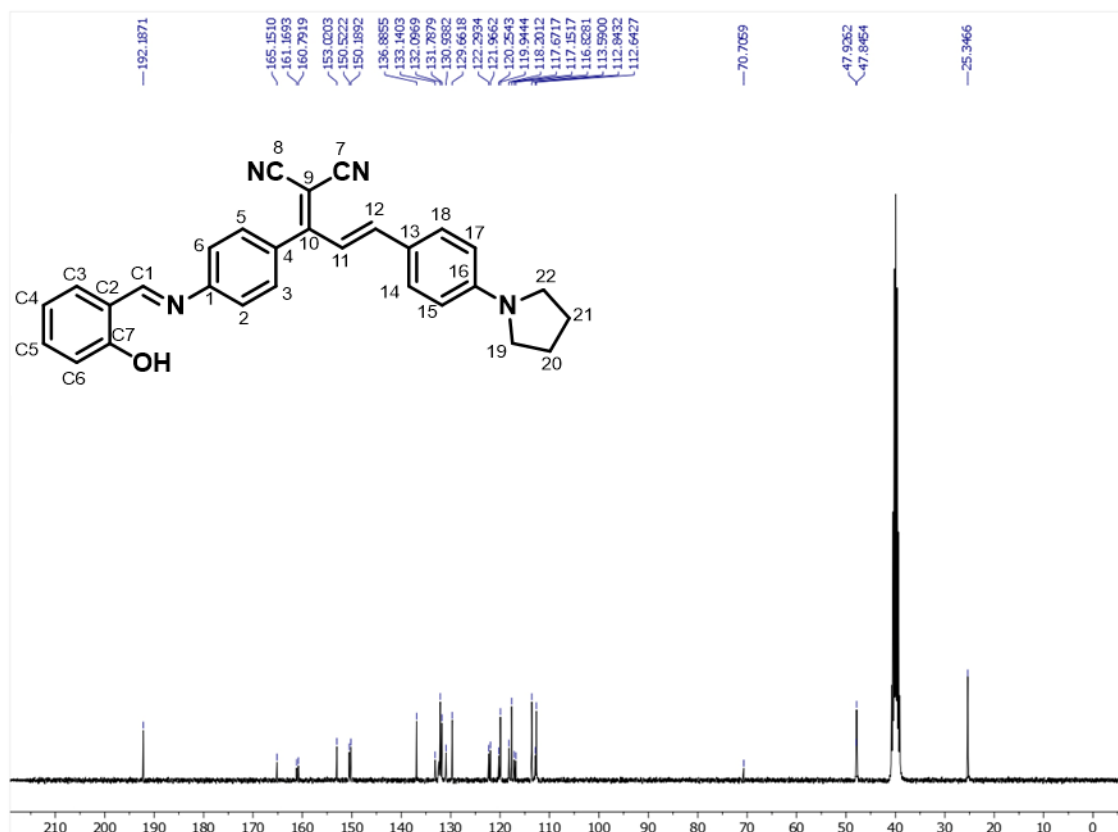

**Figure S27:**  $^{13}\text{C}$  NMR spectrum of dye **9** in  $\text{DMSO}-d_6$ .

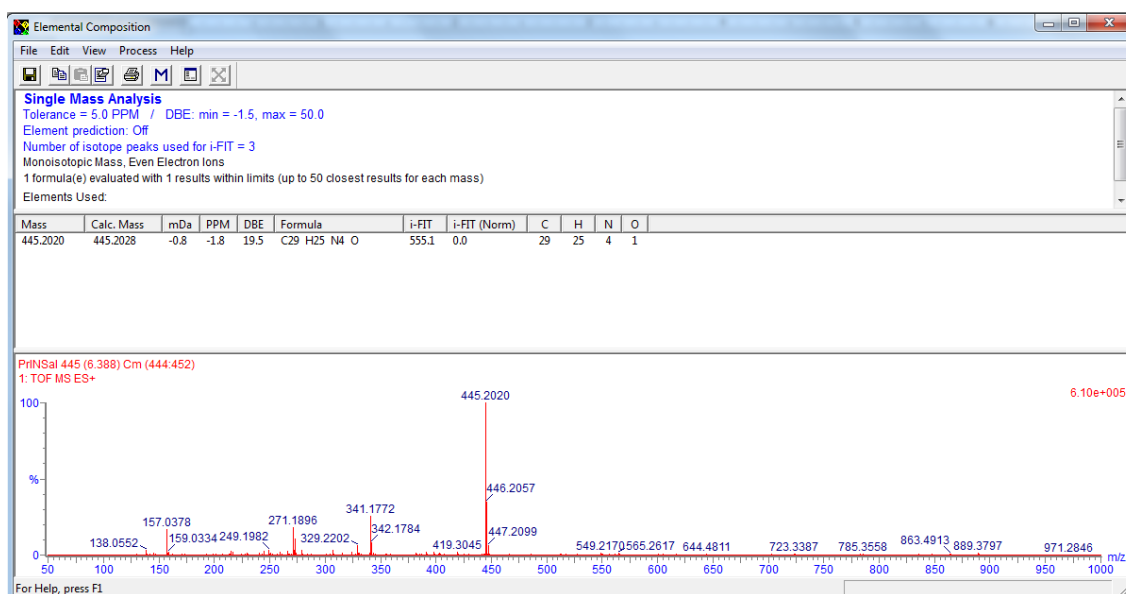

**Figure S28:** HRMS spectrum of dye **9**.

## 2.8. FTIR, <sup>1</sup>H NMR, <sup>13</sup>C NMR and HRMS spectra of dye 10

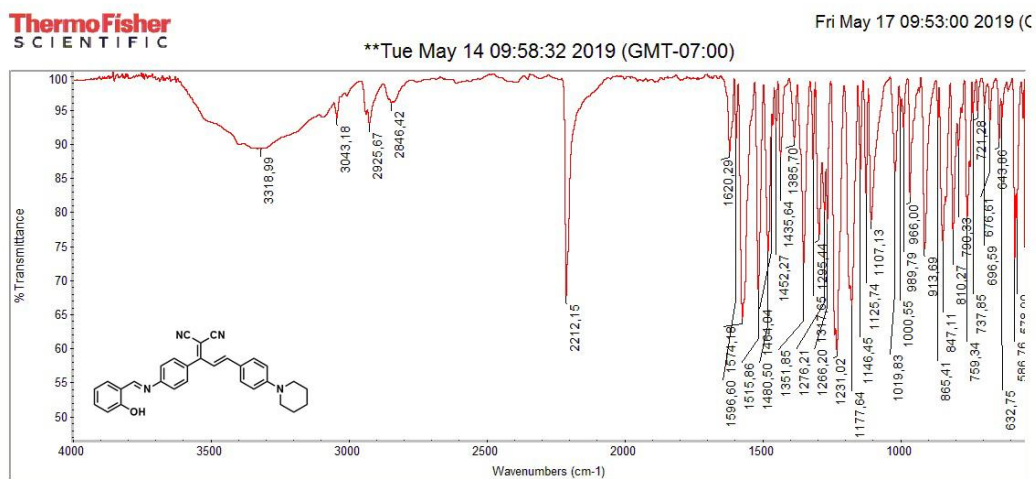

**Figure S29:** FTIR spectrum of dye **10**.

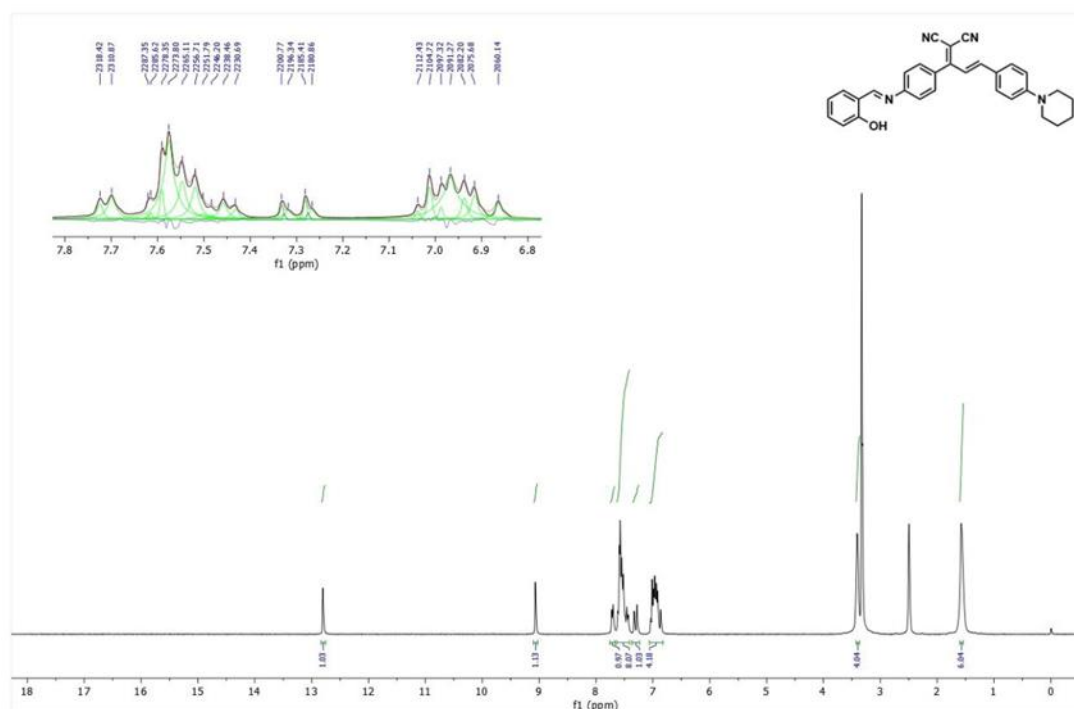

**Figure S30:**  $^1\text{H}$  NMR spectrum of dye **10** in DMSO- $d_6$ .

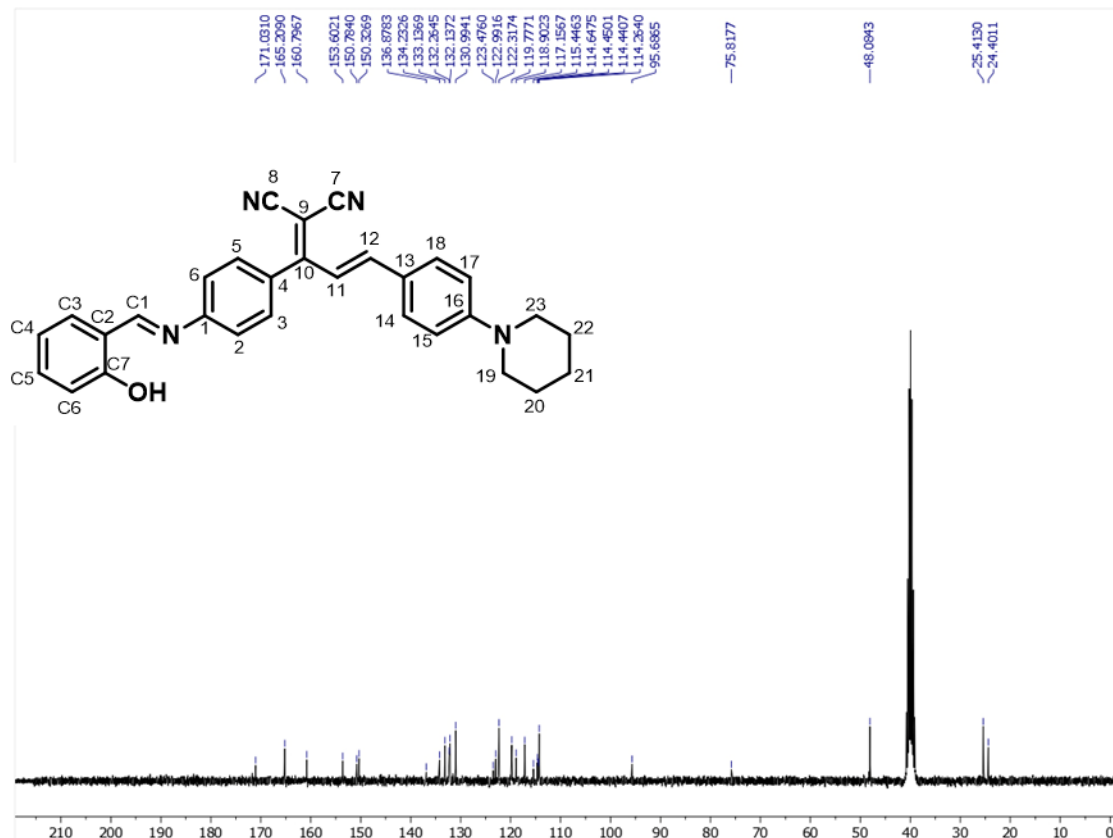

**Figure S31:**  $^{13}\text{C}$  NMR spectrum of dye 10 in  $\text{DMSO}-d_6$ .

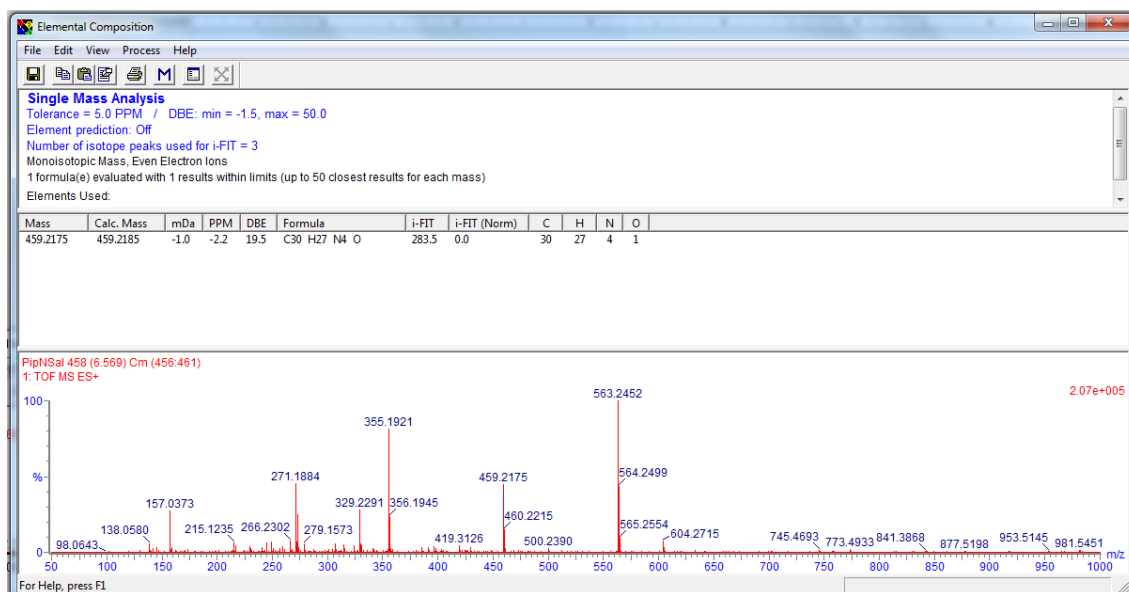

**Figure S32:** HRMS spectrum of dye 10.



## 2.9. FTIR, <sup>1</sup>H NMR, <sup>13</sup>C NMR and HRMS spectra of dye 11

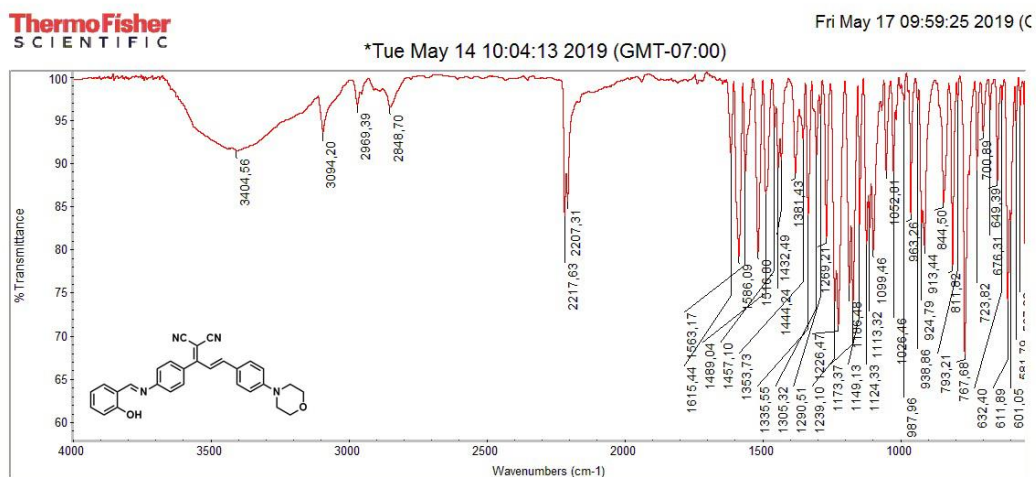

**Figure S33:** FTIR spectrum of dye 11.

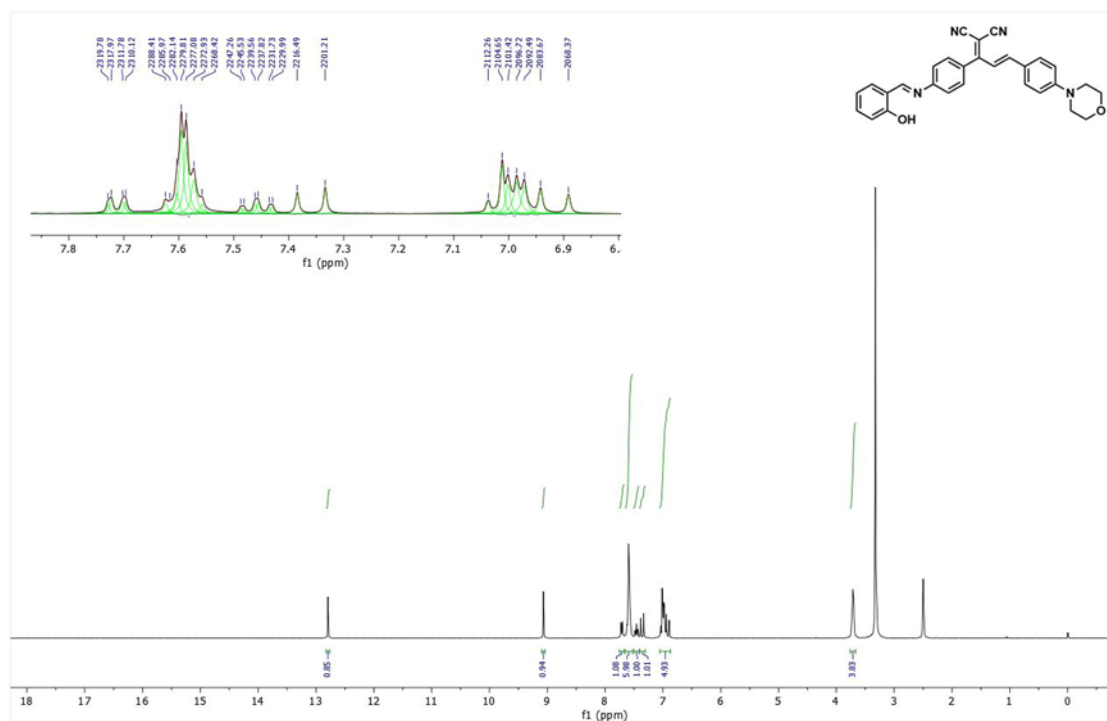

**Figure S34:**  $^1\text{H}$  NMR spectrum of dye **11** in DMSO- $d_6$ .

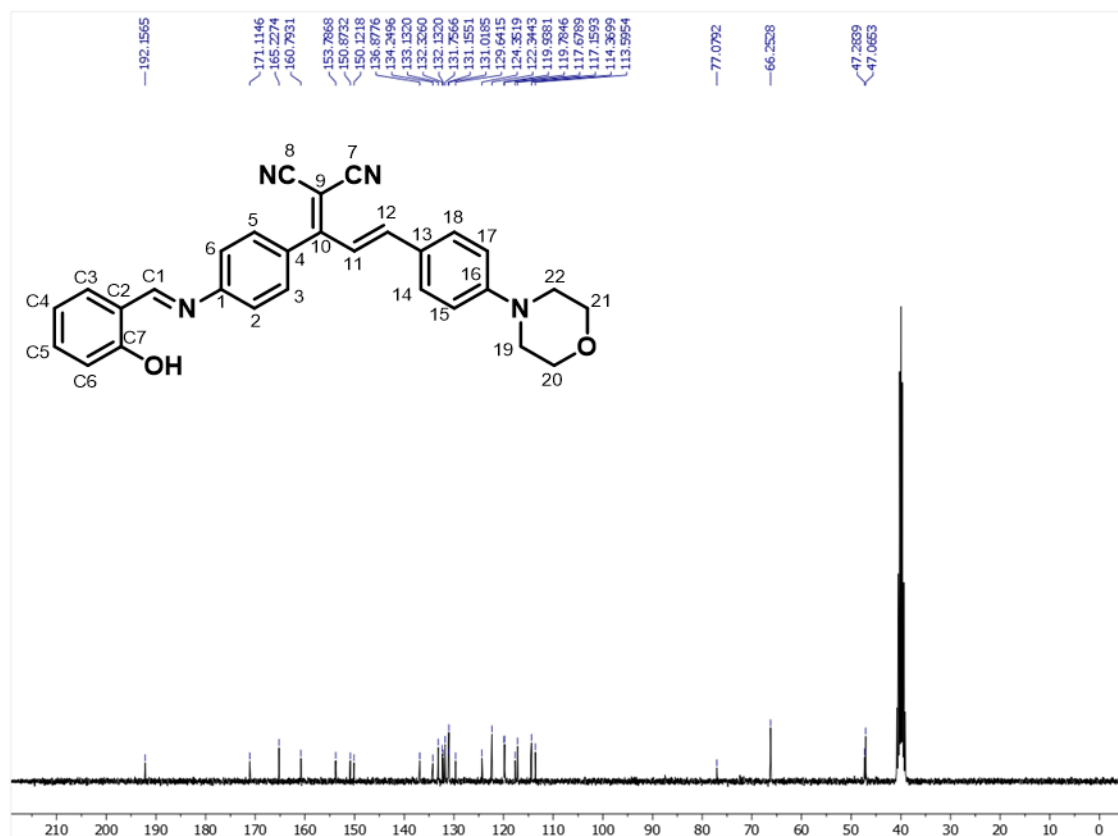

**Figure S35:**  $^{13}\text{C}$  NMR spectrum of dye 11 in  $\text{DMSO}-d_6$ .

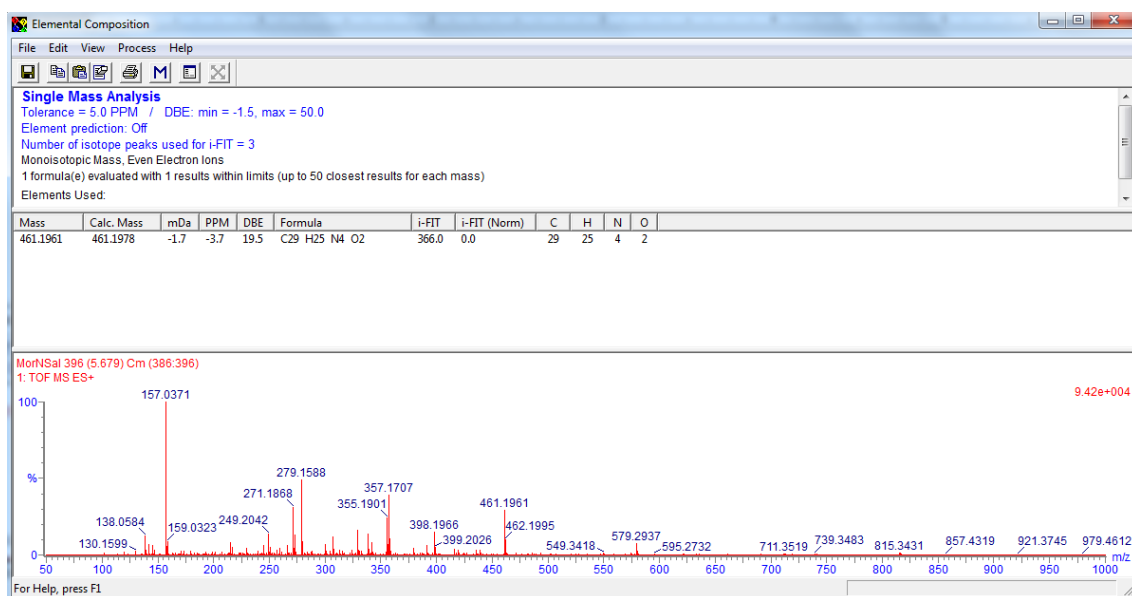

**Figure S36:** HRMS spectrum of dye 11.

## 2.10. FTIR, $^1\text{H}$ NMR, $^{13}\text{C}$ NMR and HRMS spectra of dye 12

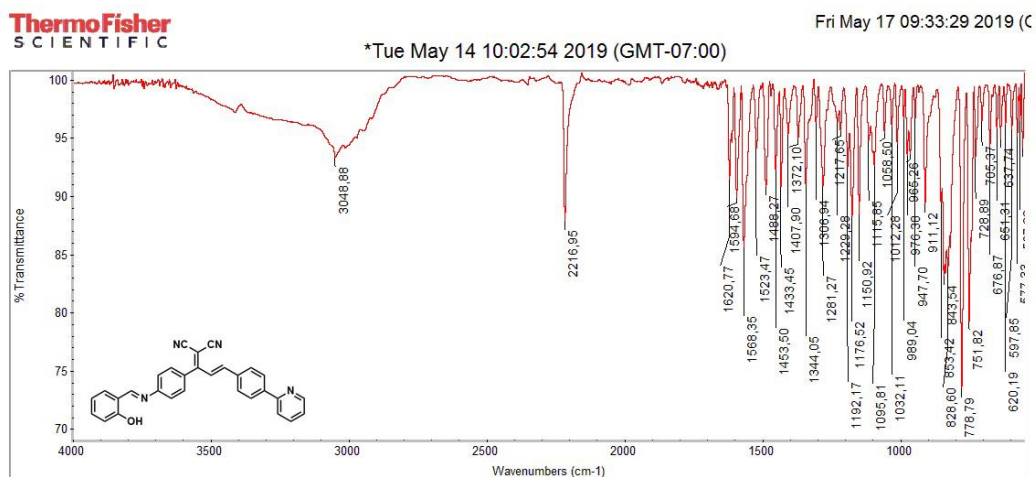

Figure S37: FTIR spectrum of dye 12.

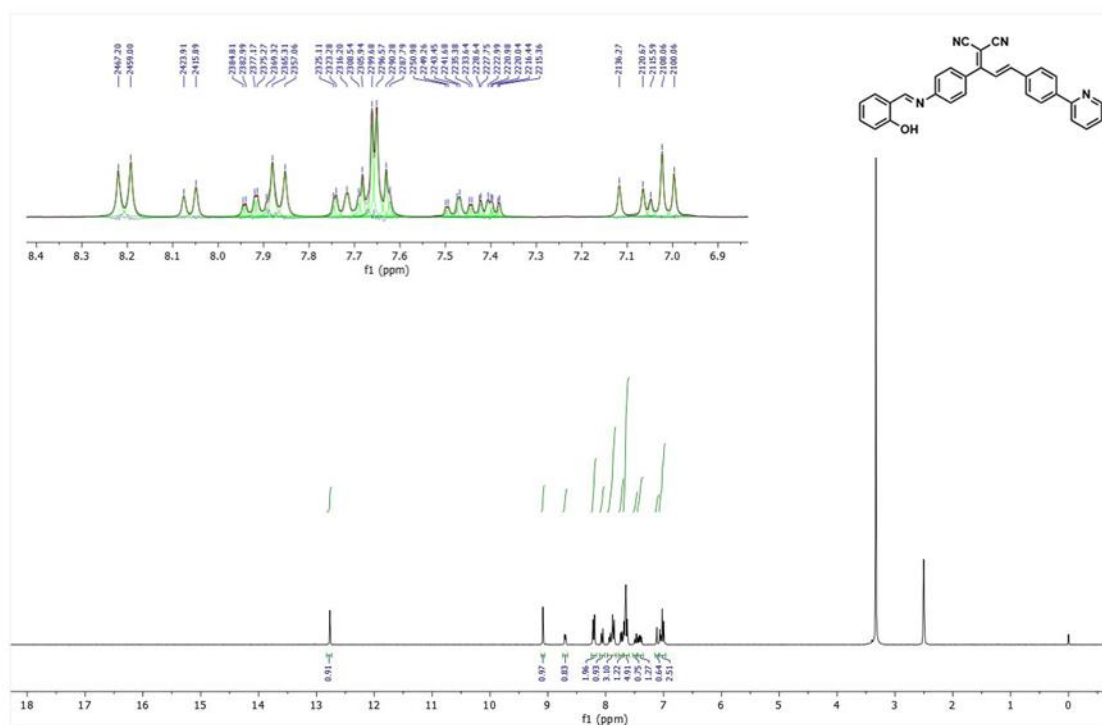

Figure S38:  $^1\text{H}$  NMR spectrum of dye 12 in DMSO- $d_6$ .

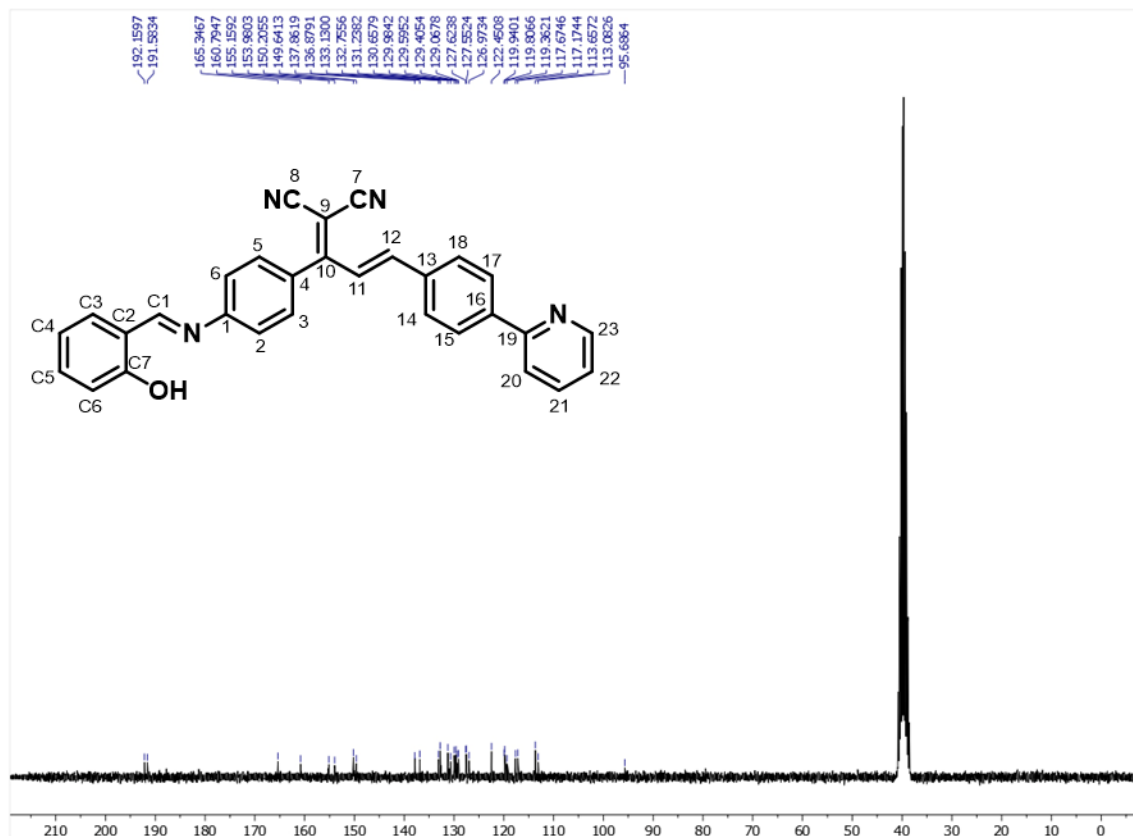

Figure S39: <sup>13</sup>C NMR spectrum of dye 12 in DMSO-*d*<sub>6</sub>.

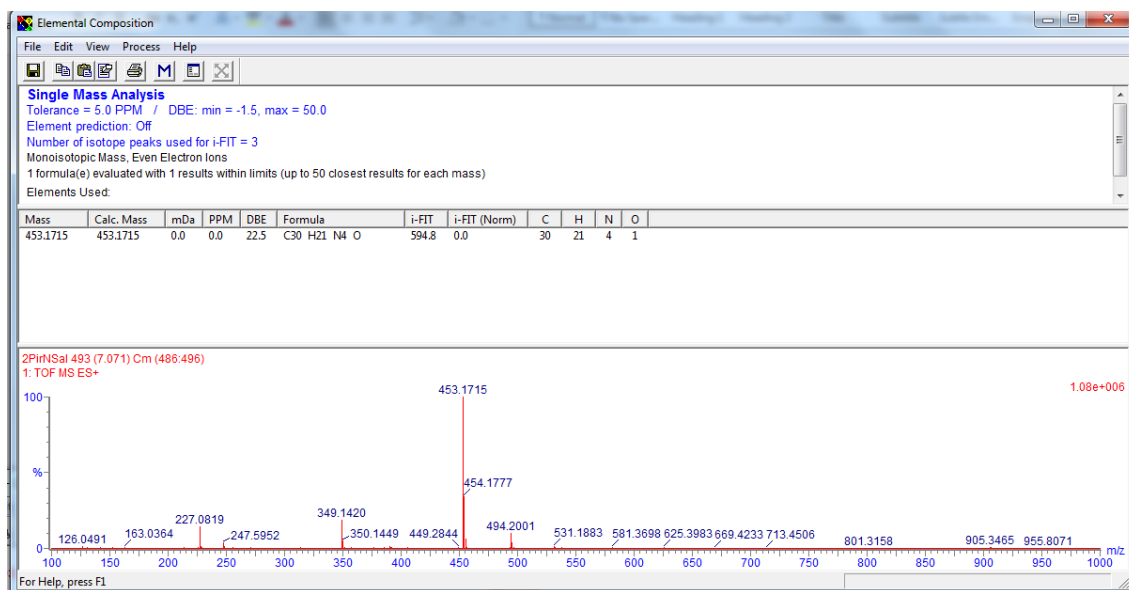

Figure S40: HRMS spectrum of dye 12.

### 3. Calculated data

#### 3.1. Optimized geometries of dyes 4–7 and 9–12

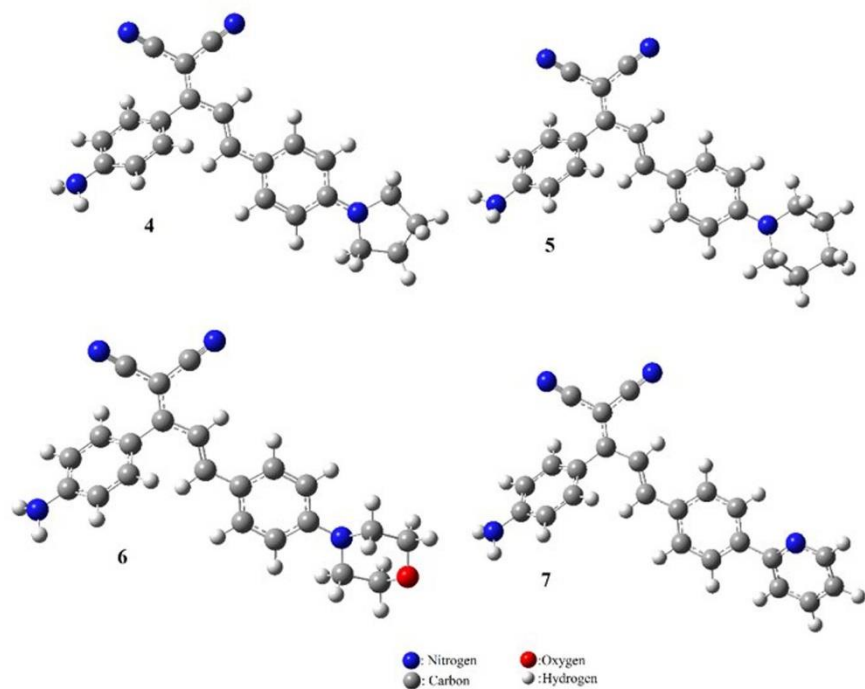

**Figure S41:** The optimized geometries of 4–7.

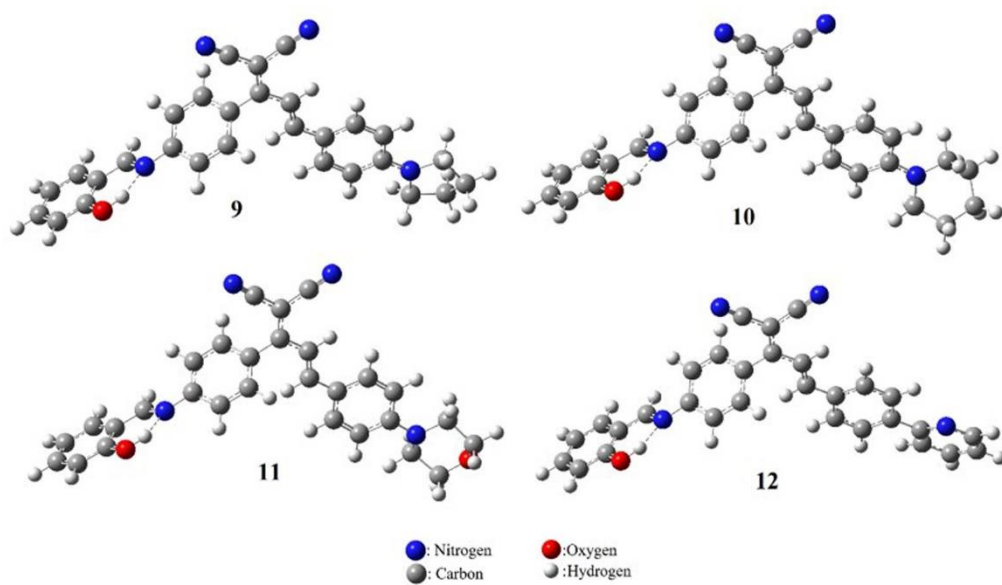

**Figure S42:** The optimized geometries of 9–12.

### 3.2. The experimental and calculated photophysical properties of dyes 8-12

**Table S1.** Photophysical properties of dyes **8-12** in various solvents with different polarity and calculated absorption spectra data.

| Experimental |                              |                                             |                                            |                         | Calculated                             |            |                                                    |                                             |        |                                    |
|--------------|------------------------------|---------------------------------------------|--------------------------------------------|-------------------------|----------------------------------------|------------|----------------------------------------------------|---------------------------------------------|--------|------------------------------------|
|              | Solvents                     | $\lambda^{\text{abs}}_{\text{max}}$<br>(nm) | $\lambda^{\text{em}}_{\text{max}}$<br>(nm) | Stokes<br>shift<br>(nm) | Stokes<br>shift<br>(cm <sup>-1</sup> ) | $\Phi_F^a$ | $\epsilon$<br>(mM <sup>-1</sup> cm <sup>-1</sup> ) | $\lambda^{\text{abs}}_{\text{max}}$<br>(nm) | $f$    | Transitions, w(%)                  |
| 8            | ACN<br>(45.6 <sup>c</sup> )  | 543                                         | 644                                        | 101                     | 2893                                   | <0.01      | 51.4                                               | 521                                         | 1.0973 | HOMO→LUMO,98.1                     |
|              | DMSO<br>(45.1 <sup>c</sup> ) | 562                                         | 650                                        | 88                      | 2434                                   | <0.01      | 53.0                                               | 524                                         | 1.1264 | HOMO→LUMO,98.4                     |
|              | DCM<br>(40.7 <sup>c</sup> )  | 546                                         | 636                                        | 90                      | 2609                                   | <0.01      | 60.2                                               | 520                                         | 1.1172 | HOMO→LUMO,98.4                     |
|              | THF<br>(37.4 <sup>c</sup> )  | 534                                         | 630                                        | 96                      | 2871                                   | <0.01      | 58.5                                               | 518                                         | 1.1075 | HOMO→LUMO,98.3                     |
|              | PhMe<br>(33.9 <sup>c</sup> ) | 529                                         | 610                                        | 81                      | 2517                                   | 0.11       | 58.6                                               | 509                                         | 1.1082 | HOMO→LUMO,98.4                     |
| 9            | ACN                          | 510                                         | 623                                        | 113                     | 3565                                   | <0.01      | 58.3                                               | 501                                         | 1.1728 | HOMO→LUMO,98.1                     |
|              | DMSO                         | 518                                         | 630                                        | 113                     | 3461                                   | <0.01      | 54.3                                               | 505                                         | 1.1971 | HOMO→LUMO,98.3                     |
|              | DCM                          | 515                                         | 612                                        | 97                      | 3086                                   | 0.01       | 40.5                                               | 501                                         | 1.1906 | HOMO→LUMO,98.2                     |
|              | THF                          | 506                                         | 610                                        | 104                     | 3389                                   | <0.01      | 54.2                                               | 499                                         | 1.1827 | HOMO→LUMO,98.1                     |
|              | PhMe                         | 504                                         | 581                                        | 77                      | 2624                                   | <0.01      | 55.8                                               | 491                                         | 1.1862 | HOMO→LUMO,98.1                     |
| 10           | ACN                          | 495                                         | 622                                        | 127                     | 4156                                   | <0.01      | 45.7                                               | 504                                         | 1.1696 | HOMO→LUMO,98.2                     |
|              | DMSO                         | 491                                         | 636                                        | 145                     | 4643                                   | <0.01      | 46.9                                               | 508                                         | 1.1929 | HOMO→LUMO,98.4                     |
|              | DCM                          | 500                                         | 614                                        | 114                     | 3724                                   | 0.01       | 33.6                                               | 503                                         | 1.1865 | HOMO→LUMO,98.3                     |
|              | THF                          | 491                                         | 612                                        | 121                     | 4037                                   | <0.01      | 41.6                                               | 501                                         | 1.1787 | HOMO→LUMO,98.2                     |
|              | PhMe                         | 487                                         | 581                                        | 94                      | 3331                                   | <0.01      | 43.8                                               | 493                                         | 1.1808 | HOMO→LUMO,98.2                     |
| 11           | ACN                          | 466                                         | 618                                        | 152                     | 5296                                   | <0.01      | 42.0                                               | 486                                         | 1.1419 | HOMO→LUMO,96.8                     |
|              | DMSO                         | 467                                         | 625                                        | 158                     | 5446                                   | <0.01      | 36.5                                               | 489                                         | 1.1618 | HOMO→LUMO,97.2                     |
|              | DCM                          | 470                                         | 598                                        | 128                     | 4565                                   | 0.01       | 28.4                                               | 485                                         | 1.1593 | HOMO→LUMO,96.8                     |
|              | THF                          | 467                                         | 602                                        | 135                     | 4802                                   | 0.01       | 39.5                                               | 483                                         | 1.1535 | HOMO→LUMO,96.8                     |
|              | PhMe                         | 464                                         | 563                                        | 99                      | 3783                                   | <0.01      | 41.6                                               | 476                                         | 1.1661 | HOMO→LUMO,96.4                     |
| 12           | ACN                          | 377                                         | 459                                        | 82                      | 4783                                   | n.d        | 52.7                                               | 428                                         | 1.1826 | HOMO-1→LUMO,52.4<br>HOMO→LUMO,46.0 |
|              | DMSO                         | 385                                         | 496                                        | 111                     | 5796                                   | n.d        | 50.5                                               | 430                                         | 1.1910 | HOMO-1→LUMO,51.1<br>HOMO→LUMO,47.6 |
|              | DCM                          | 381                                         | 473                                        | 92                      | 5114                                   | n.d        | 30.4                                               | 430                                         | 1.2153 | HOMO-1→LUMO,55.8<br>HOMO→LUMO,42.7 |
|              | THF                          | 380                                         | 458                                        | 78                      | 4501                                   | n.d        | 56.9                                               | 429                                         | 1.2175 | HOMO-1→LUMO,56.7<br>HOMO→LUMO,41.7 |
|              | PhMe                         | 384                                         | 578                                        | 194                     | 8729                                   | n.d        | 53.1                                               | 428                                         | 1.2858 | HOMO-1→LUMO,58.3<br>HOMO→LUMO,39.8 |

<sup>a</sup>Solvents arranged in order of decreasing  $E_T^{30}$  values. <sup>b</sup>Fluorescence quantum yield ( $\pm 10\%$ ) determined relative to fluorescein in pH=9 solution ( $\Phi_F = 0.95$ ) as standard. <sup>c</sup>The values for relative polarity are taken from [1]. n.d, it couldn't be determined.

## 4. Photophysical properties of dyes 3–12

### 4.1. Calculation formula for relative quantum yield

Relative Quantum Yields of all synthesized compound are measured using equation below by taking Fluorescein ( $\Phi_F = 0.95$  in pH 9) as a reference.

$$\Phi_s = \Phi_r \times \frac{A_r}{A_s} \times \frac{I_s}{I_r} \times \frac{n_s^2}{n_r^2}$$

$\Phi$  : Quantum Yield  
 $A$  : Maximum absorbance value ( $0.055 < A < 0.095$ )  
 $I$  : Maximum Fluorescence value  
 $n$  : Solvent's refractive index  
Subscript "s" : Sample  
Subscript "r" : Reference

### 4.2. Photoluminescence properties of dye 3

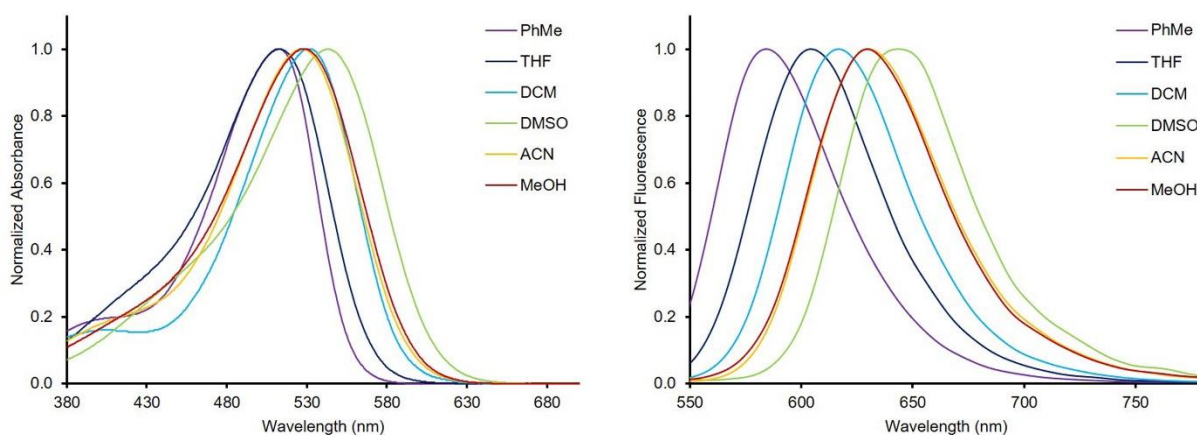

**Figure S43:** Normalized absorption (left) and fluorescence (right) spectra of dye **3** in various solvents with different polarity.

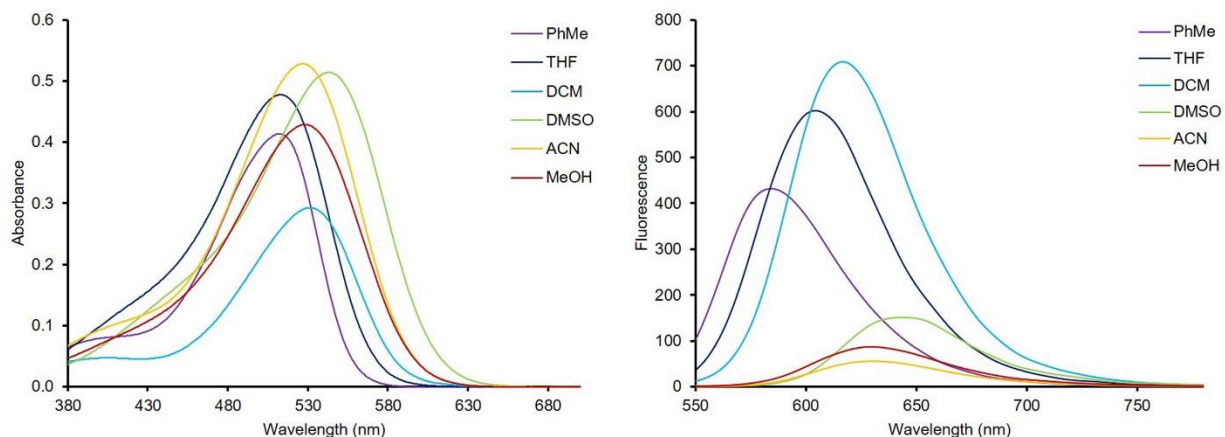

**Figure S44:** Absorption (left) and fluorescence (right) spectra of dye **3** in various solvents with different polarity.

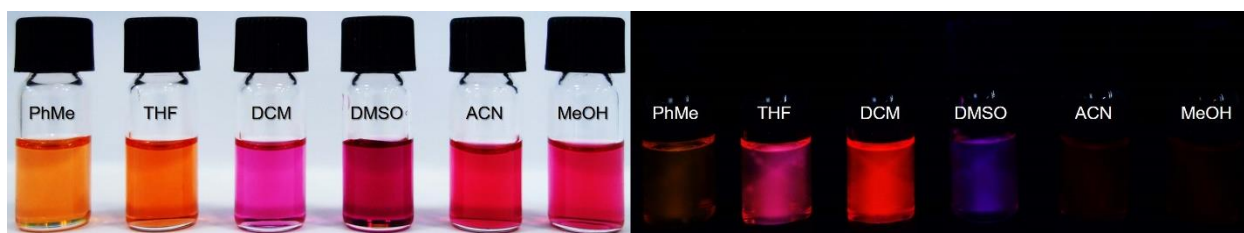

**Figure S45:** Photographs of dye **3** under ambient light (left) and 365 nm UV lamp (right) in various solvents with different polarity.

Photophysical properties of dye **3** in various solvents with different polarity

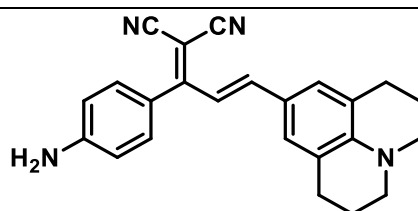

Dye **3**

| Solvent | $\lambda_{\text{abs}}^{\text{max}}$ (nm) | $\lambda_{\text{em}}^{\text{max}}$ (nm) | Stokes shift (nm) | Stokes shift ( $\text{cm}^{-1}$ ) | $\Phi_F$ | $\epsilon$ ( $\text{mM}^{-1}\text{cm}^{-1}$ ) |
|---------|------------------------------------------|-----------------------------------------|-------------------|-----------------------------------|----------|-----------------------------------------------|
| MeOH    | 528                                      | 630                                     | 102               | 3074                              | <0.01    | 42.6                                          |
| ACN     | 527                                      | 630                                     | 103               | 3125                              | <0.01    | 51.7                                          |
| DMSO    | 543                                      | 644                                     | 101               | 2879                              | <0.01    | 49.8                                          |
| DCM     | 531                                      | 617                                     | 86                | 2632                              | 0.01     | 36.8                                          |
| THF     | 513                                      | 604                                     | 91                | 2961                              | 0.01     | 45.9                                          |
| PhMe    | 512                                      | 584                                     | 72                | 2414                              | <0.01    | 41.4                                          |



#### 4.3. Photoluminescence properties of dye 4

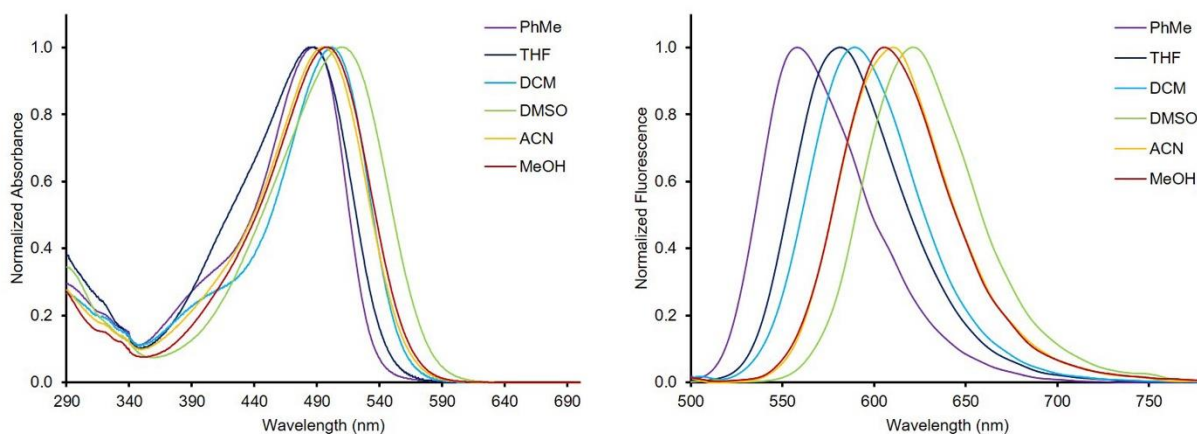

**Figure S46:** Normalized absorption (left) and fluorescence (right) spectra of dye 4 in various solvents with different polarity.

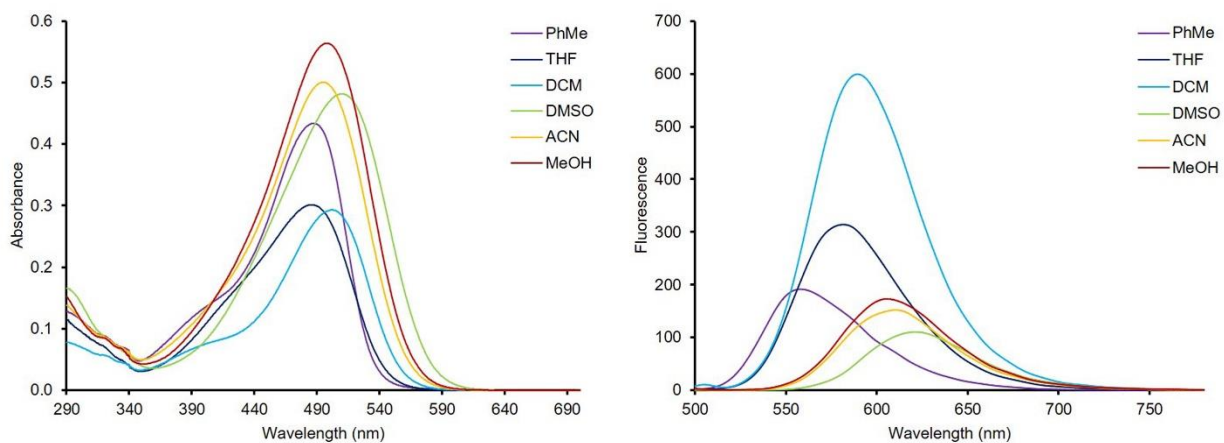

**Figure S47:** Absorption (left) and fluorescence (right) spectra of dye 4 in various solvents with different polarity.

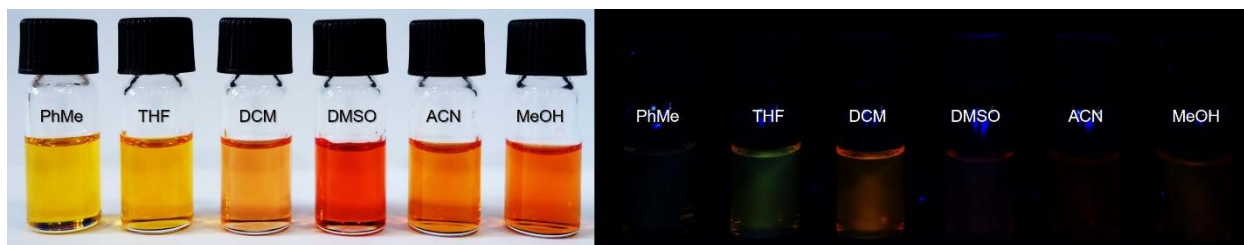

**Figure S48:** Photographs of dye 4 under ambient light (left) and 365 nm UV lamp (right) in various solvents with different polarity.

Photophysical properties of dye **4** in various solvents with different polarity

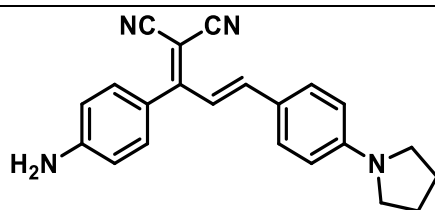

Dye **4**

| Solvent | $\lambda_{\text{abs\_max}}$ (nm) | $\lambda_{\text{em\_max}}$ (nm) | Stokes shift (nm) | Stokes shift ( $\text{cm}^{-1}$ ) | $\Phi_F$ | $\epsilon$ ( $\text{mM}^{-1}\text{cm}^{-1}$ ) |
|---------|----------------------------------|---------------------------------|-------------------|-----------------------------------|----------|-----------------------------------------------|
| MeOH    | 498                              | 606                             | 108               | 3568                              | <0.01    | 55.4                                          |
| ACN     | 495                              | 611                             | 116               | 3819                              | <0.01    | 48.6                                          |
| DMSO    | 510                              | 622                             | 112               | 3515                              | <0.01    | 49.6                                          |
| DCM     | 502                              | 589                             | 87                | 2954                              | 0.01     | 30.1                                          |
| THF     | 486                              | 582                             | 96                | 3403                              | <0.01    | 33.7                                          |
| PhMe    | 488                              | 558                             | 70                | 2592                              | <0.01    | 41.9                                          |

#### 4.4. Photoluminescence properties of dye **5**

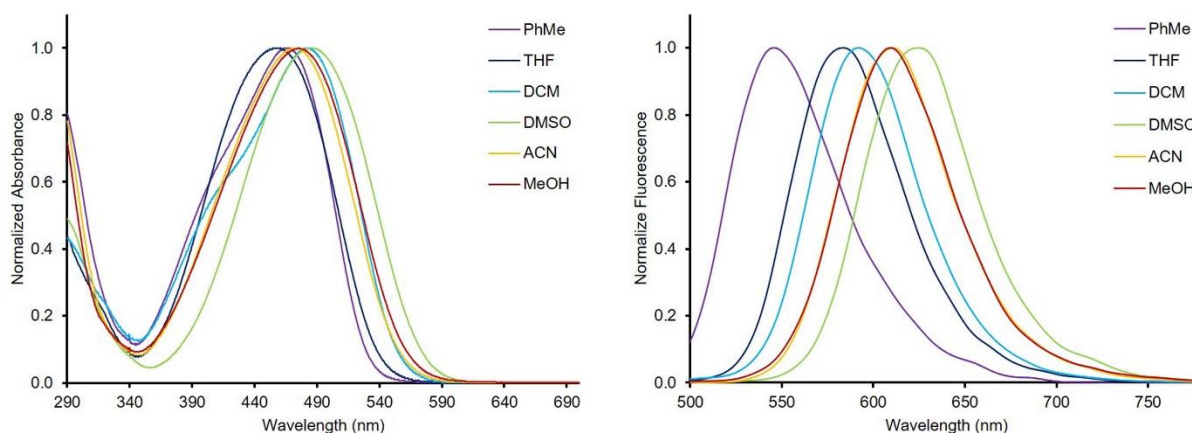

**Figure S49:** Normalized absorption (left) and fluorescence (right) spectra of dye **5** in various solvents with different polarity.

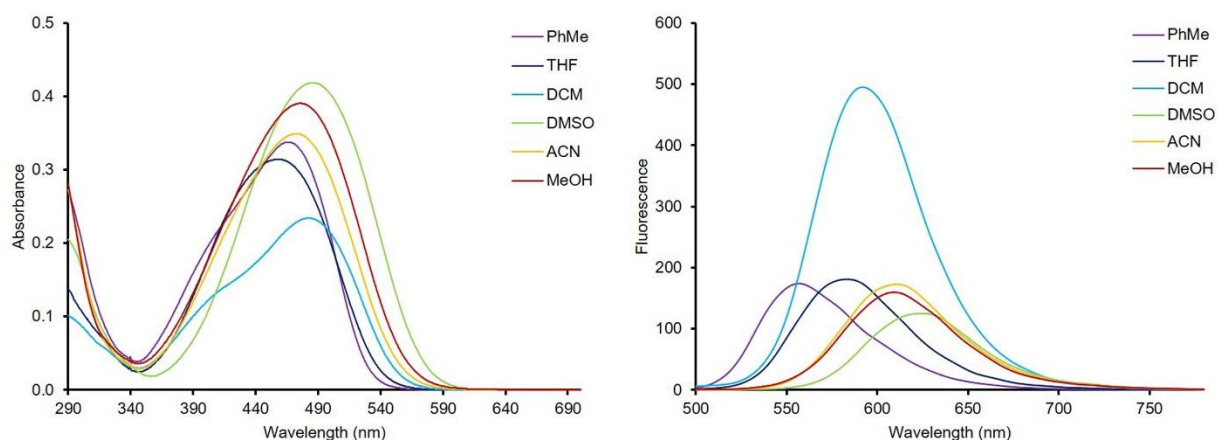

**Figure S50:** Absorption (left) and fluorescence (right) spectra of dye **5** in various solvents with different polarity.

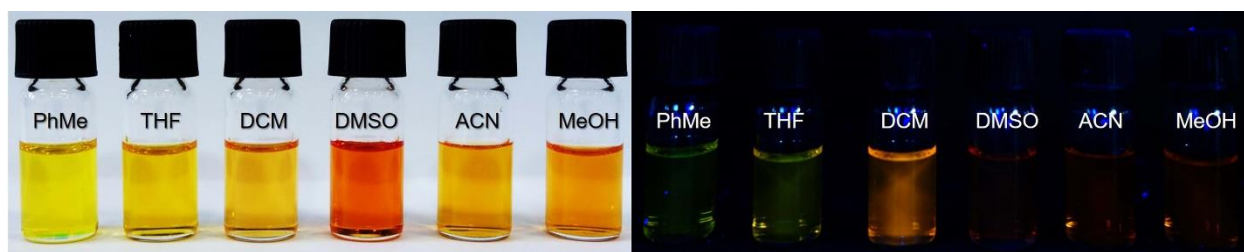

**Figure S51:** Photographs of dye **5** under ambient light (left) and 365 nm UV lamp (right) in various solvents with different polarity.

Photophysical properties of dye **5** in various solvents with different polarity

| <div style="display: flex; align-items: center; justify-content: center;"> <div style="text-align: center;"> <chem>Nc1ccc(cc1)/C(=C/C(=C/c2ccc(cc2)N3CCCCC3)C#N)C#N</chem> </div> <div style="margin-left: 20px;">Dye <b>5</b></div> </div> |                                  |                                 |                   |                                   |          |                                               |
|---------------------------------------------------------------------------------------------------------------------------------------------------------------------------------------------------------------------------------------------|----------------------------------|---------------------------------|-------------------|-----------------------------------|----------|-----------------------------------------------|
| Solvent                                                                                                                                                                                                                                     | $\lambda_{\text{abs\_max}}$ (nm) | $\lambda_{\text{em\_max}}$ (nm) | Stokes shift (nm) | Stokes shift ( $\text{cm}^{-1}$ ) | $\Phi_F$ | $\epsilon$ ( $\text{mM}^{-1}\text{cm}^{-1}$ ) |
| MeOH                                                                                                                                                                                                                                        | 476                              | 609                             | 133               | 4599                              | <0.01    | 39.9                                          |
| ACN                                                                                                                                                                                                                                         | 473                              | 611                             | 134               | 4770                              | <0.01    | 35.9                                          |
| DMSO                                                                                                                                                                                                                                        | 486                              | 624                             | 138               | 4561                              | <0.01    | 42.1                                          |
| DCM                                                                                                                                                                                                                                         | 483                              | 592                             | 109               | 3828                              | 0.01     | 25.3                                          |
| THF                                                                                                                                                                                                                                         | 457                              | 583                             | 126               | 4741                              | <0.01    | 31.4                                          |
| PhMe                                                                                                                                                                                                                                        | 467                              | 557                             | 90                | 3476                              | <0.01    | 33.9                                          |

#### 4.5. Photoluminescence properties of dye 6

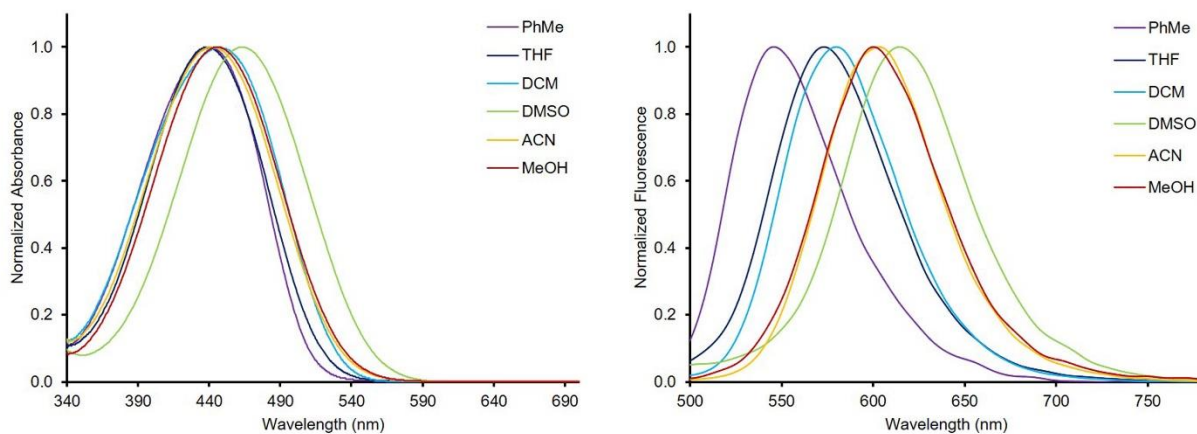

**Figure S52:** Normalized absorption (left) and fluorescence (right) spectra of dye 6 in various solvents with different polarity.

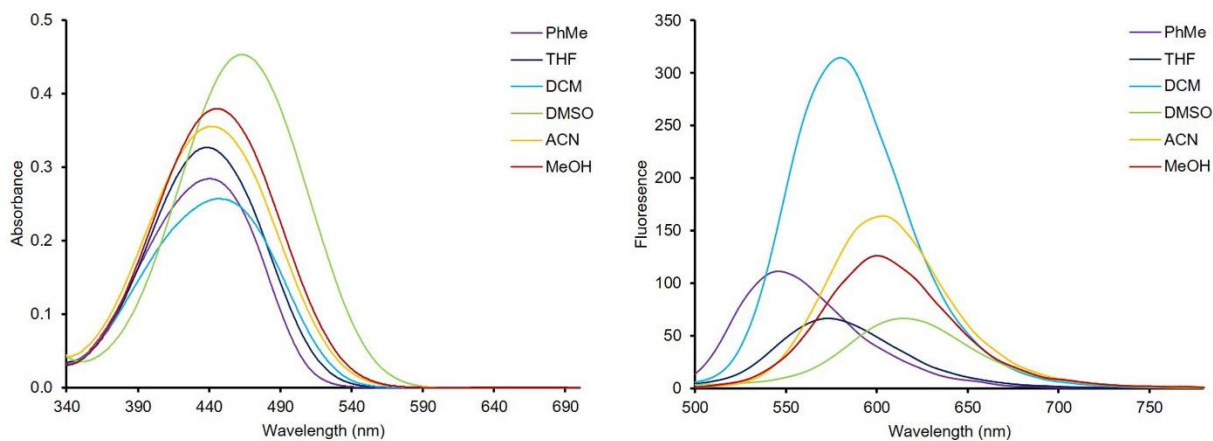

**Figure S53:** Absorption (left) and fluorescence (right) spectra of dye 6 in various solvents with different polarity.

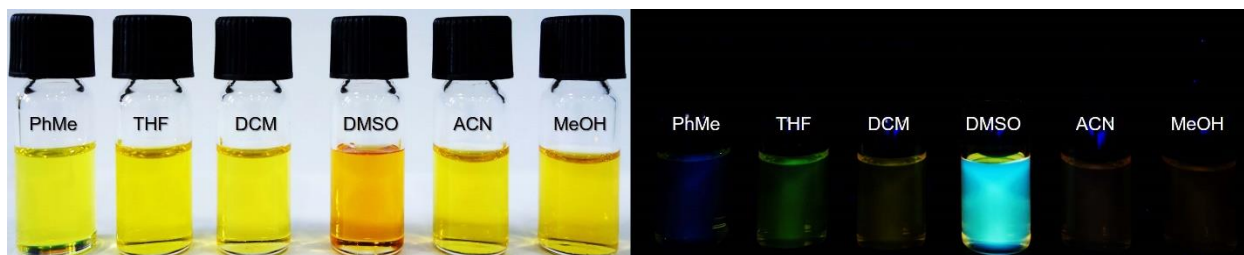

**Figure S54:** Photographs of dye 6 under ambient light (left) and 365 nm UV lamp (right) in various solvents with different polarity.

Photophysical properties of dye **6** in various solvents with different polarity

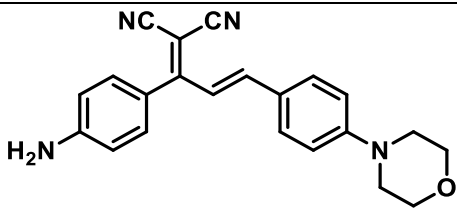

Dye **6**

| Solvent | $\lambda_{\text{abs}}^{\text{max}}$ (nm) | $\lambda_{\text{em}}^{\text{max}}$ (nm) | Stokes shift (nm) | Stokes shift ( $\text{cm}^{-1}$ ) | $\Phi_F$ | $\epsilon$ ( $\text{mM}^{-1}\text{cm}^{-1}$ ) |
|---------|------------------------------------------|-----------------------------------------|-------------------|-----------------------------------|----------|-----------------------------------------------|
| MeOH    | 446                                      | 600                                     | 154               | 5786                              | <0.01    | 40.8                                          |
| ACN     | 442                                      | 603                                     | 161               | 6052                              | <0.01    | 34.6                                          |
| DMSO    | 463                                      | 614                                     | 151               | 5346                              | <0.01    | 42.7                                          |
| DCM     | 448                                      | 580                                     | 132               | 5099                              | <0.01    | 27.8                                          |
| THF     | 439                                      | 573                                     | 134               | 5359                              | <0.01    | 34.7                                          |
| PhMe    | 440                                      | 546                                     | 106               | 4399                              | <0.01    | 30.6                                          |

#### 4.6. Photoluminescence properties of dye **7**

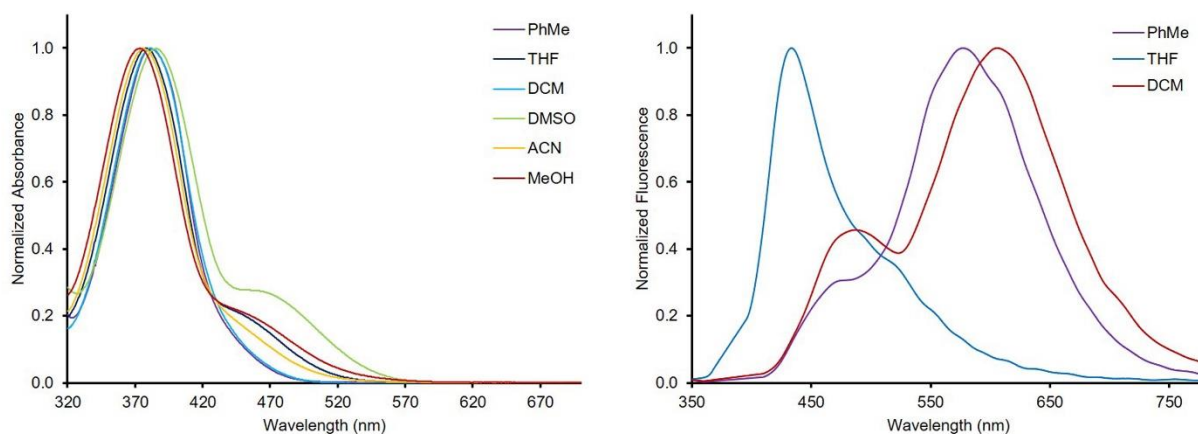

**Figure S55:** Normalized absorption (left) and fluorescence (right) spectra of dye **7** in various solvents with different polarity.

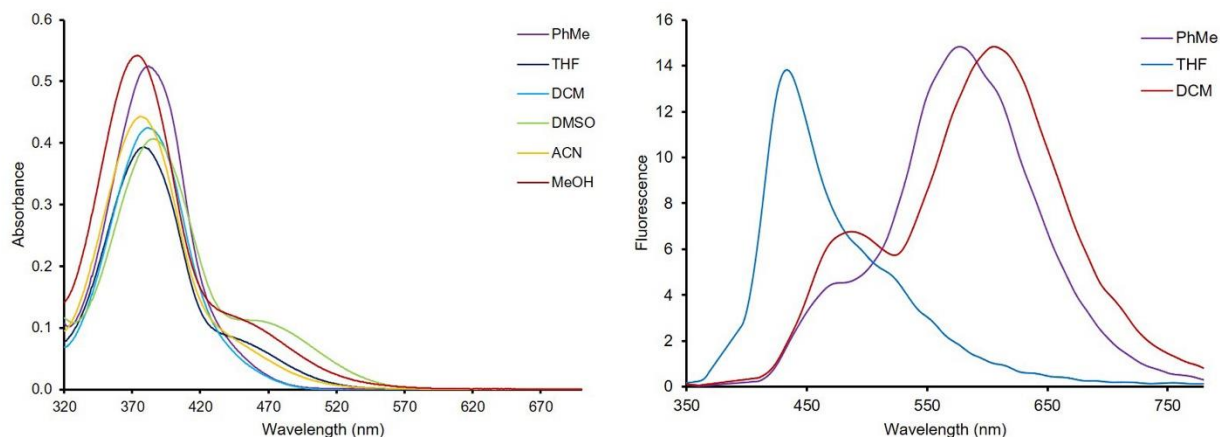

**Figure S56:** Absorption (left) and fluorescence (right) spectra of dye **7** in various solvents with different polarity.

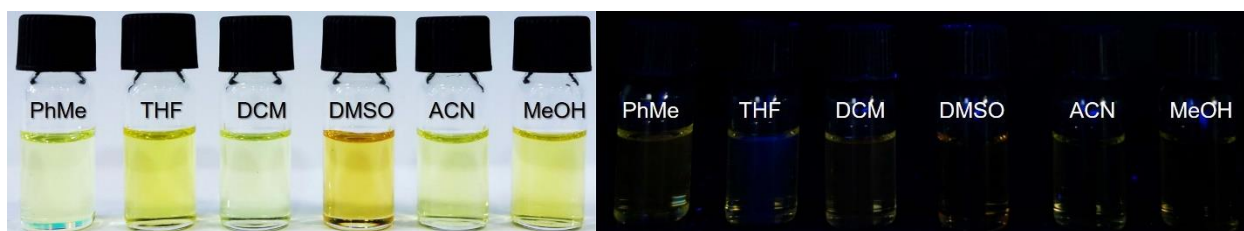

**Figure S57:** Photographs of dye **7** under ambient light (left) and 365 nm UV lamp (right) in various solvents with different polarity.

Photophysical properties of dye **7** in various solvents with different polarity

| <div style="text-align: center;"> 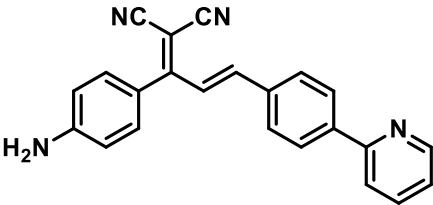 </div> |                                          |                                         |                   |                                   |          |                                               |
|------------------------------------------------------------------------------------------------------------------------------|------------------------------------------|-----------------------------------------|-------------------|-----------------------------------|----------|-----------------------------------------------|
| Dye <b>7</b>                                                                                                                 |                                          |                                         |                   |                                   |          |                                               |
| Solvent                                                                                                                      | $\lambda_{\text{abs}}^{\text{max}}$ (nm) | $\lambda_{\text{em}}^{\text{max}}$ (nm) | Stokes shift (nm) | Stokes shift ( $\text{cm}^{-1}$ ) | $\Phi_F$ | $\epsilon$ ( $\text{mM}^{-1}\text{cm}^{-1}$ ) |
| MeOH                                                                                                                         | 374                                      | -                                       | -                 | -                                 | -        | 51.4                                          |
| ACN                                                                                                                          | 376                                      | -                                       | -                 | -                                 | -        | 43.4                                          |
| DMSO                                                                                                                         | 386                                      | -                                       | -                 | -                                 | -        | 40.4                                          |
| DCM                                                                                                                          | 382                                      | 606                                     | 224               | 9705                              | n.d      | 42.1                                          |
| THF                                                                                                                          | 379                                      | 434                                     | 55                | 3357                              | n.d      | 40.4                                          |
| PhMe                                                                                                                         | 382                                      | 577                                     | 195               | 8853                              | n.d      | 53.1                                          |

n.d, it couldn't be determined.



#### 4.7. Photoluminescence properties of dye **8**

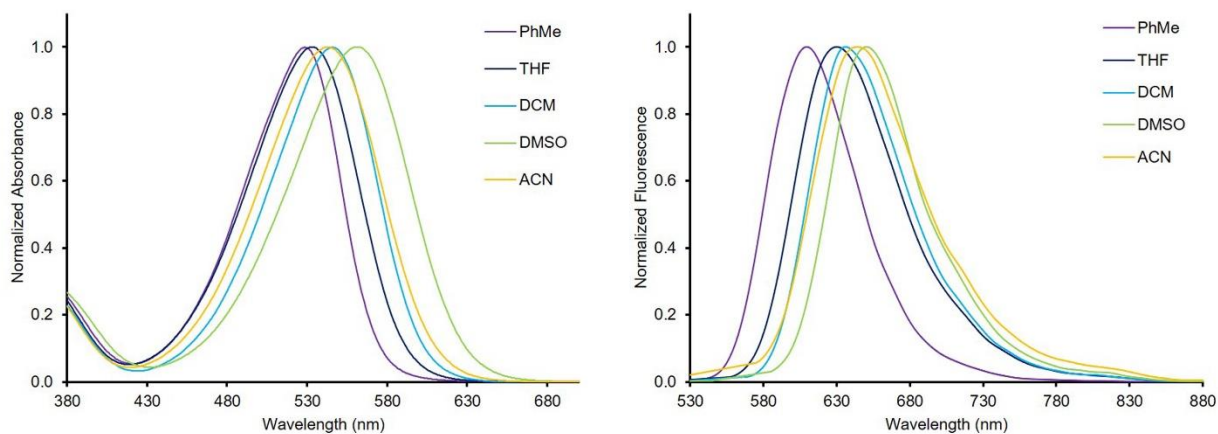

**Figure S58:** Normalized absorption (left) and fluorescence (right) spectra of dye **8** in various solvents with different polarity.

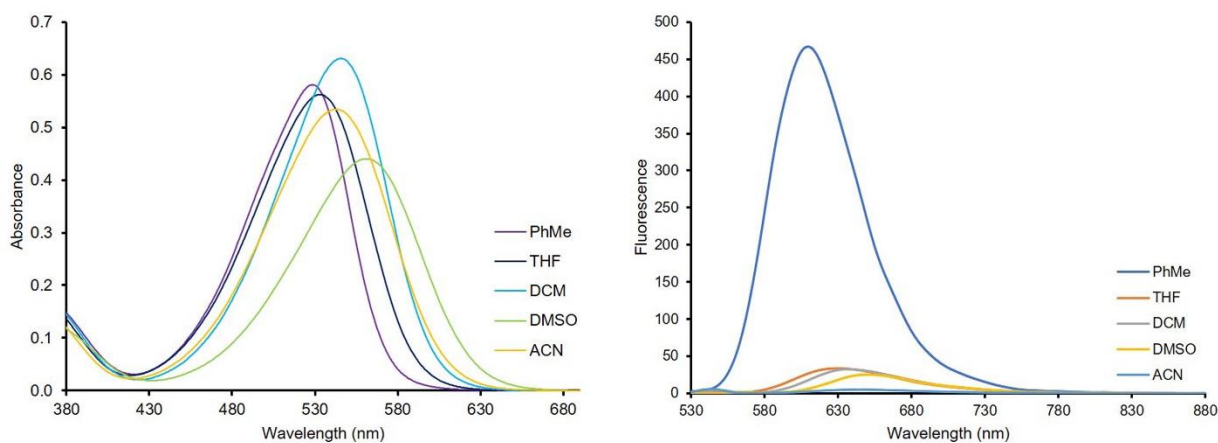

**Figure S59:** Absorption (left) and fluorescence (right) spectra of dye **8** in various solvents with different polarity.

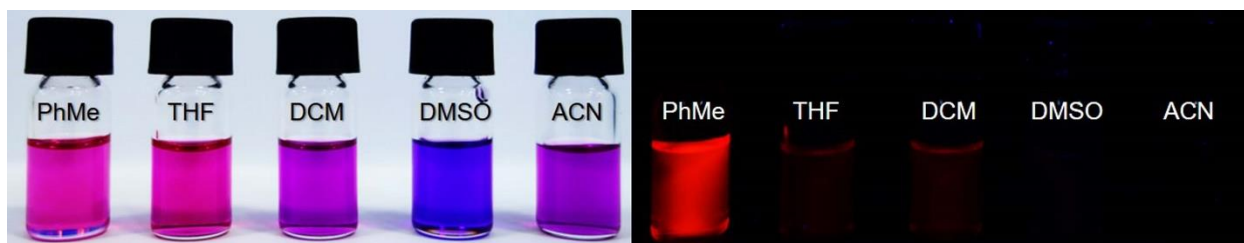

**Figure S60:** Photographs of dye **8** under ambient light (left) and 365 nm UV lamp (right) in various solvents with different polarity.

Photophysical properties of dye **8** in various solvents with different polarity

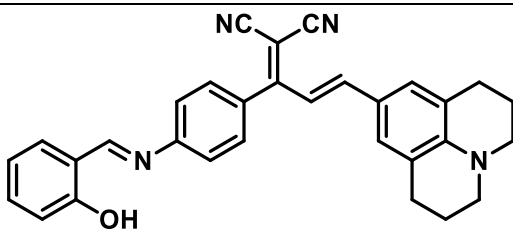

Dye **8**

| Solvent | $\lambda_{\text{abs\_max}}$ (nm) | $\lambda_{\text{em\_max}}$ (nm) | Stokes shift (nm) | Stokes shift ( $\text{cm}^{-1}$ ) | $\Phi_F$ | $\epsilon$ ( $\text{mM}^{-1}\text{cm}^{-1}$ ) |
|---------|----------------------------------|---------------------------------|-------------------|-----------------------------------|----------|-----------------------------------------------|
| ACN     | 543                              | 644                             | 101               | 2893                              | <0.01    | 51.4                                          |
| DMSO    | 562                              | 650                             | 88                | 2434                              | <0.01    | 53.0                                          |
| DCM     | 546                              | 636                             | 90                | 2609                              | <0.01    | 60.2                                          |
| THF     | 534                              | 630                             | 96                | 2871                              | <0.01    | 58.5                                          |
| PhMe    | 529                              | 610                             | 81                | 2517                              | 0.01     | 58.6                                          |

#### 4.8. Photoluminescence properties of dye **9**

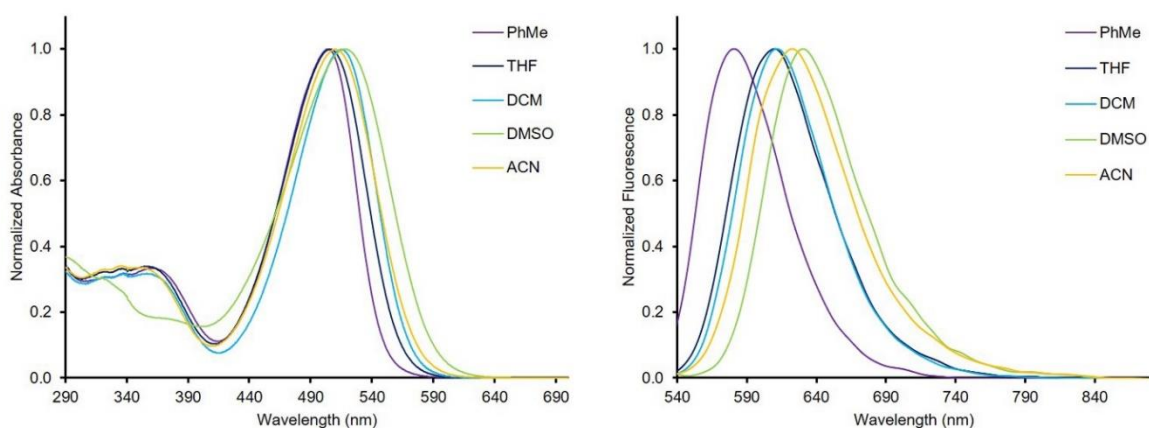

**Figure S61:** Normalized absorption (left) and fluorescence (right) spectra of dye **9** in various solvents with different polarity.



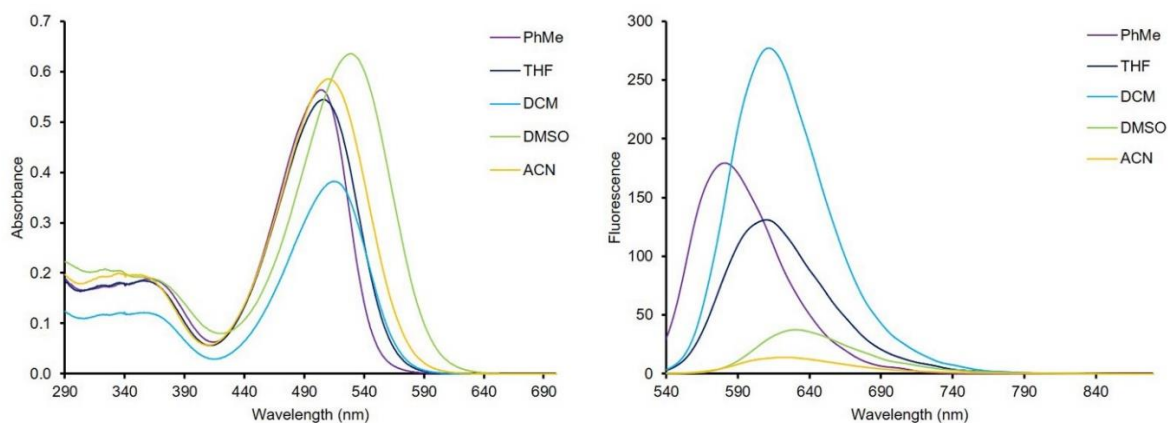

**Figure S62:** Absorption (left) and fluorescence (right) spectra of dye **9** in various solvents with different polarity.

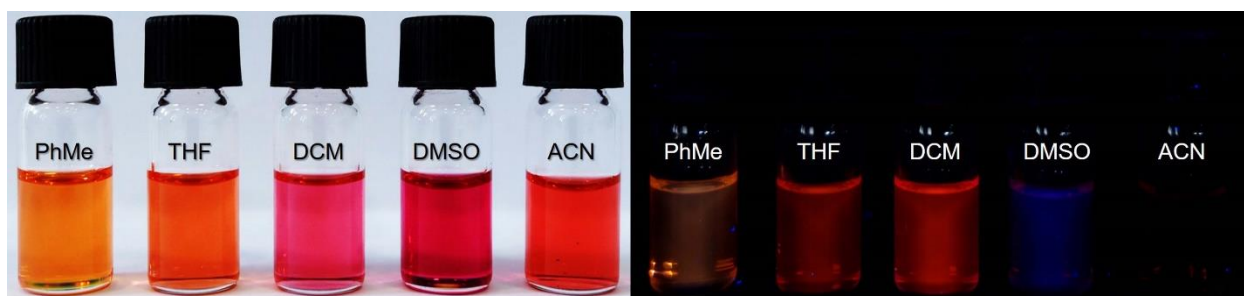

**Figure S63:** Photographs of dye **9** under ambient light (left) and 365 nm UV lamp (right) in various solvents with different polarity.

Photophysical properties of dye **9** in various solvents with different polarity

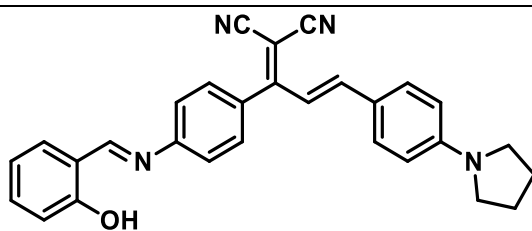

Dye **9**

| Solvent | $\lambda_{\text{abs\_max}}$ (nm) | $\lambda_{\text{em\_max}}$ (nm) | Stokes shift (nm) | Stokes shift ( $\text{cm}^{-1}$ ) | $\Phi_F$ | $\epsilon$ ( $\text{mM}^{-1}\text{cm}^{-1}$ ) |
|---------|----------------------------------|---------------------------------|-------------------|-----------------------------------|----------|-----------------------------------------------|
| ACN     | 510                              | 623                             | 113               | 3565                              | <0.01    | 58.2                                          |
| DMSO    | 518                              | 630                             | 113               | 3461                              | <0.01    | 54.3                                          |
| DCM     | 515                              | 612                             | 97                | 3086                              | 0.01     | 40.5                                          |
| THF     | 506                              | 610                             | 104               | 3389                              | <0.01    | 54.2                                          |
| PhMe    | 504                              | 581                             | 77                | 2624                              | <0.01    | 55.8                                          |

#### 4.9. Photoluminescence properties of dye 10

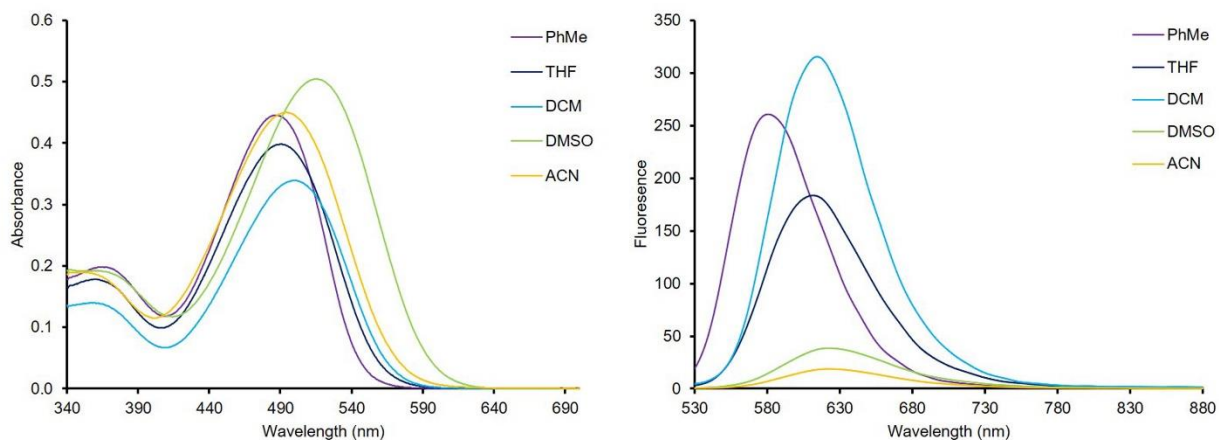

**Figure S64:** Normalized absorption (left) and fluorescence (right) spectra of dye **10** in various solvents with different polarity.

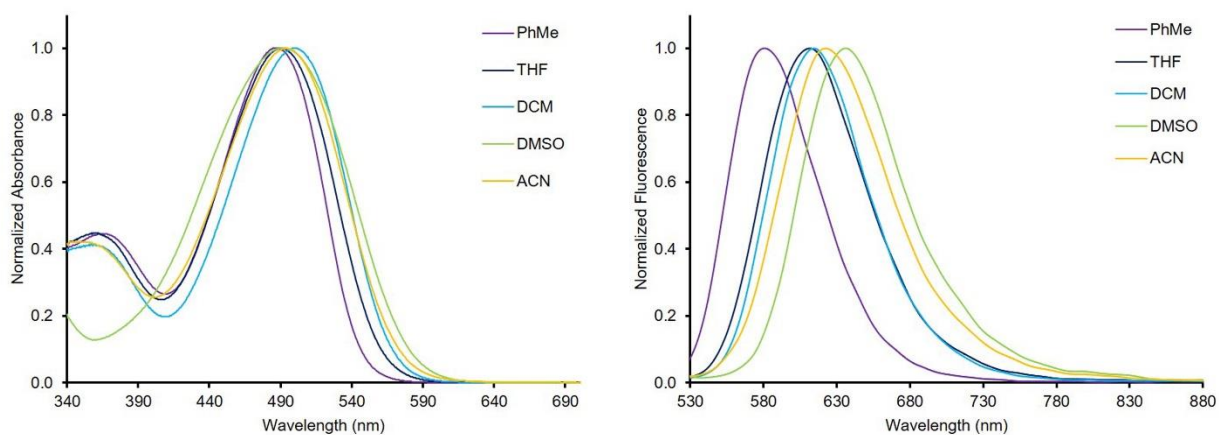

**Figure S65:** Absorption (left) and fluorescence (right) spectra of dye **10** in various solvents with different polarity.

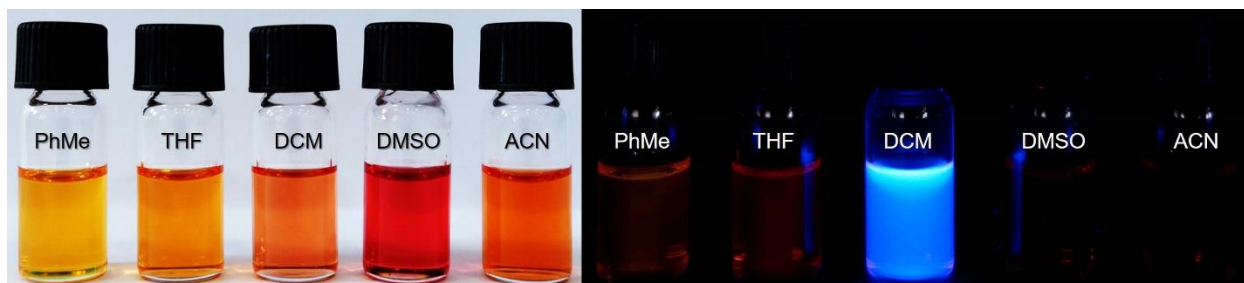

**Figure S66:** Photographs of dye **10** under ambient light (left) and 365 nm UV lamp (right) in various solvents with different polarity.

Photophysical properties of dye **10** in various solvents with different polarity

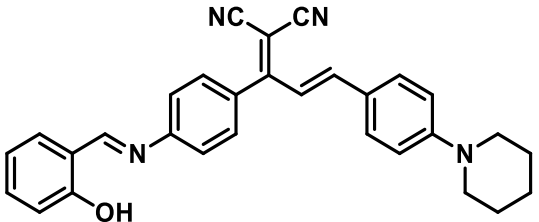

Dye **10**

| Solvent | $\lambda_{\text{abs\_max}}$ (nm) | $\lambda_{\text{em\_max}}$ (nm) | Stokes shift (nm) | Stokes shift ( $\text{cm}^{-1}$ ) | $\Phi_F$ | $\epsilon$ ( $\text{mM}^{-1}\text{cm}^{-1}$ ) |
|---------|----------------------------------|---------------------------------|-------------------|-----------------------------------|----------|-----------------------------------------------|
| ACN     | 495                              | 622                             | 127               | 4156                              | <0.01    | 45.7                                          |
| DMSO    | 491                              | 636                             | 145               | 4643                              | <0.01    | 46.9                                          |
| DCM     | 500                              | 614                             | 114               | 3724                              | <0.01    | 33.6                                          |
| THF     | 491                              | 612                             | 121               | 4037                              | <0.01    | 41.6                                          |
| PhMe    | 487                              | 581                             | 94                | 3331                              | <0.01    | 43.8                                          |

#### 4.10. Photoluminescence properties of dye **11**

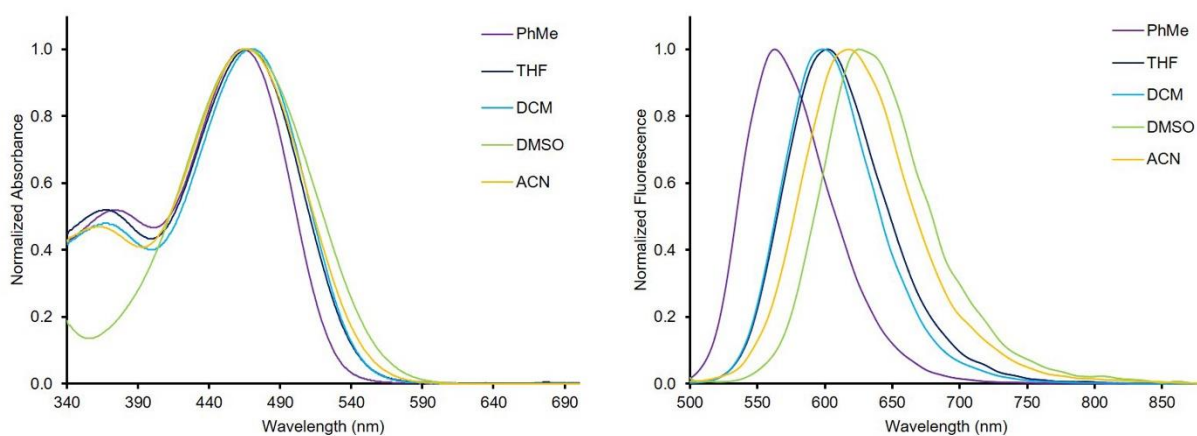

**Figure S67:** Normalized absorption (left) and fluorescence (right) spectra of dye **11** in various solvents with different polarity.

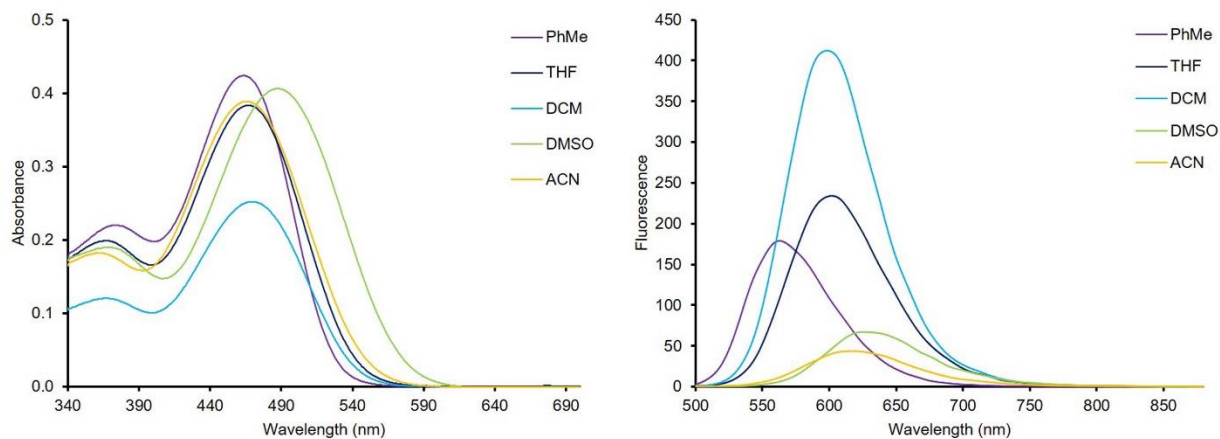

**Figure S68:** Absorption (left) and fluorescence (right) spectra of dye **11** in various solvents with different polarity.

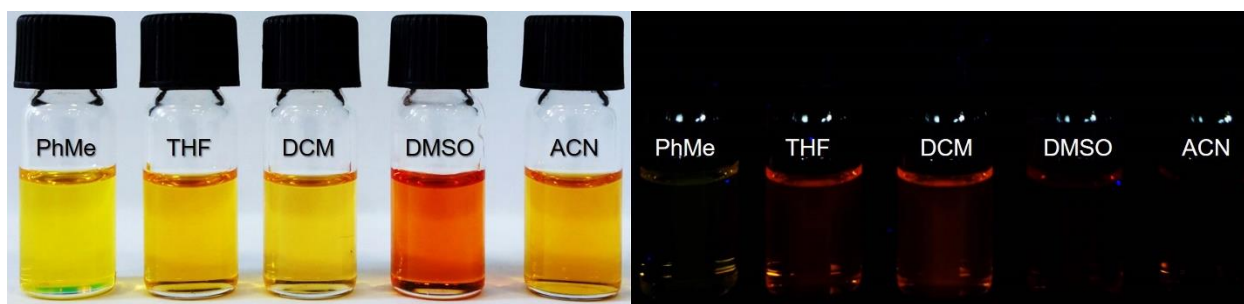

**Figure S69:** Photographs of dye **11** under ambient light (left) and 365 nm UV lamp (right) in various solvents with different polarity

Photophysical properties of dye **11** in various solvents with different polarity

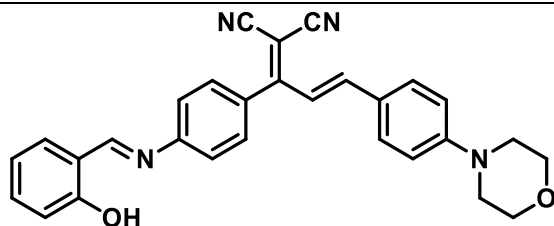

Dye **11**

| Solvent | $\lambda_{\text{abs\_max}}$ (nm) | $\lambda_{\text{em\_max}}$ (nm) | Stokes shift (nm) | Stokes shift ( $\text{cm}^{-1}$ ) | $\Phi_F$ | $\epsilon$ ( $\text{mM}^{-1}\text{cm}^{-1}$ ) |
|---------|----------------------------------|---------------------------------|-------------------|-----------------------------------|----------|-----------------------------------------------|
| ACN     | 466                              | 618                             | 152               | 5296                              | 0.01<    | 42.0                                          |
| DMSO    | 467                              | 625                             | 158               | 5446                              | 0.01<    | 36.5                                          |
| DCM     | 470                              | 598                             | 128               | 4565                              | 0.01<    | 28.4                                          |
| THF     | 467                              | 602                             | 135               | 4802                              | 0.01     | 39.5                                          |
| PhMe    | 464                              | 563                             | 99                | 3783                              | 0.01<    | 41.6                                          |

#### 4.11. Photoluminescence properties of dye 12

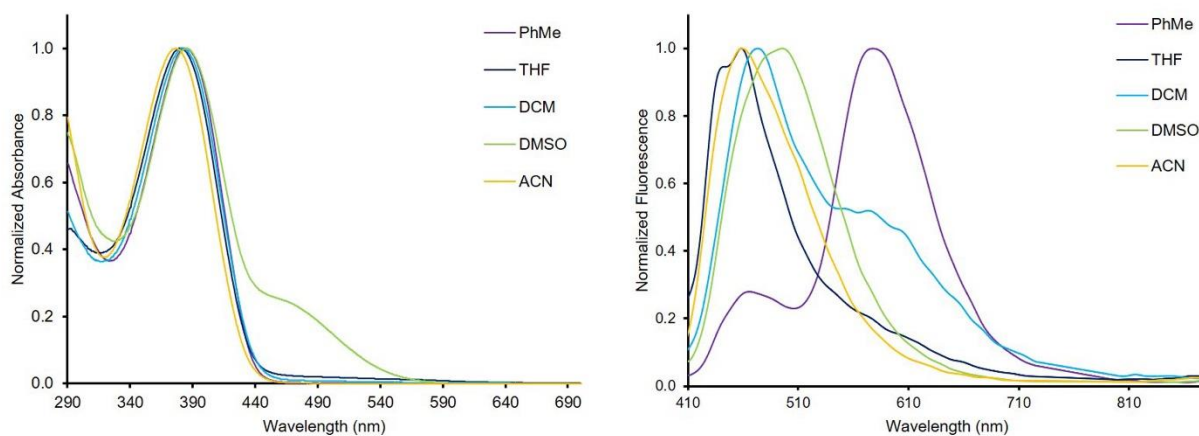

**Figure S70:** Normalized absorption (left) and fluorescence (right) spectra of dye 12 in various solvents with different polarity.



**Figure S71:** Absorption (left) and fluorescence (right) spectra of dye 12 in various solvents with different polarity.

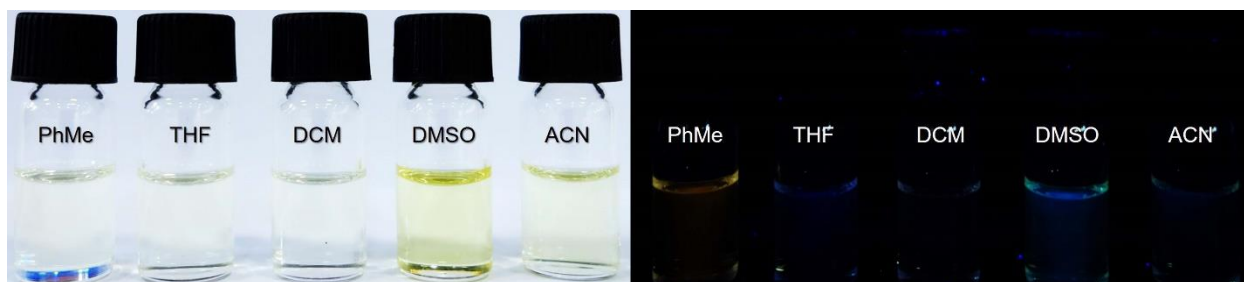

**Figure S72:** Photographs of dye 12 under ambient light (left) and 365 nm UV lamp (right) in various solvents with different polarity.

Photophysical properties of dye **12** in various solvents with different polarity

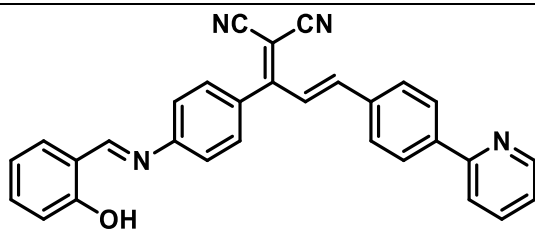

Dye **12**

| Solvent | $\lambda_{\text{abs}}^{\text{max}}$ (nm) | $\lambda_{\text{em}}^{\text{max}}$ (nm) | Stokes shift (nm) | Stokes shift ( $\text{cm}^{-1}$ ) | $\Phi_F$ | $\epsilon$ ( $\text{mM}^{-1}\text{cm}^{-1}$ ) |
|---------|------------------------------------------|-----------------------------------------|-------------------|-----------------------------------|----------|-----------------------------------------------|
| ACN     | 377                                      | 459                                     | 82                | 4783                              | n.d      | 52.7                                          |
| DMSO    | 385                                      | 496                                     | 111               | 5796                              | n.d      | 50.5                                          |
| DCM     | 381                                      | 473                                     | 92                | 5114                              | n.d      | 30.4                                          |
| THF     | 380                                      | 458                                     | 78                | 4501                              | n.d      | 56.9                                          |
| PhMe    | 384                                      | 578                                     | 194               | 8729                              | n.d      | 53.1                                          |

n.d, it couldn't be determined.

## 5. Interaction of dyes 8–12 with hydroxide anion

### 5.1. Interaction of dye 8 with hydroxide anion

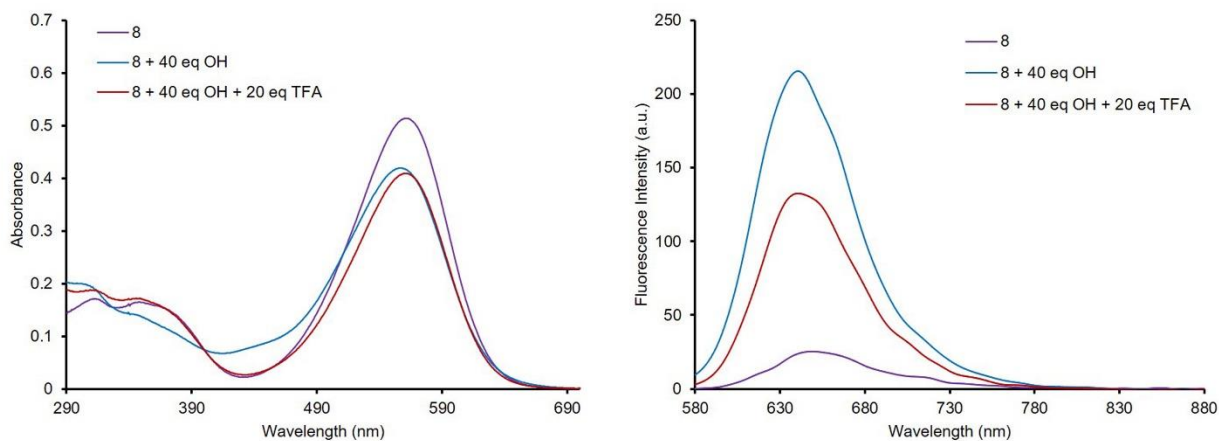

**Figure S73:** UV-Vis absorption (left) and Fluorescence (right) spectrum of dye **8** in DMSO while being treated with 40 equiv of Tetrabutylammonium hydroxide (TBAOH) and 20 equiv of Trifluoroacetic acid (TFA).



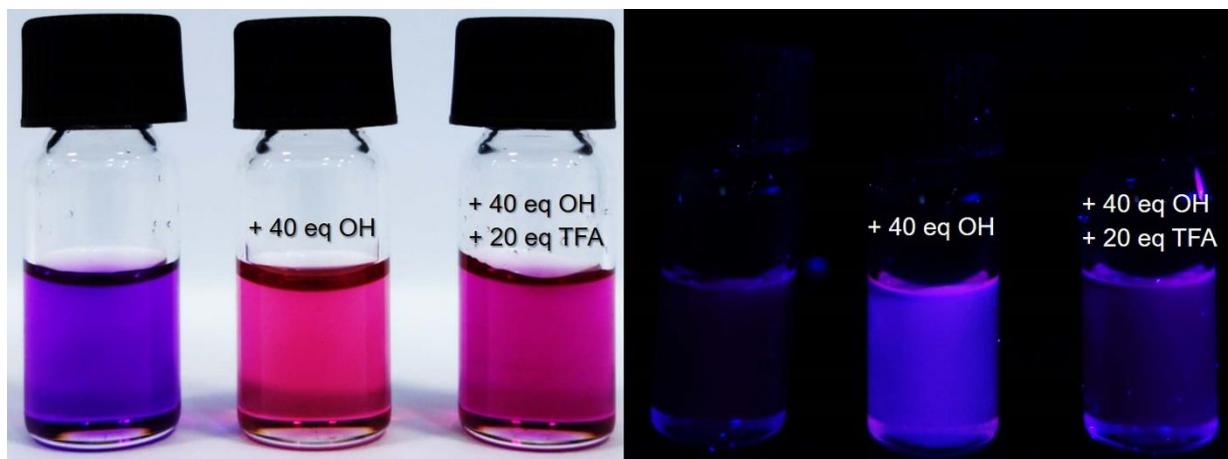

**Figure S74:** Photographs of dye **8** in DMSO under ambient light (left) and 365 nm UV lamp (right) while being treated with 40 equiv of Tetrabutylammonium hydroxide (TBAOH) and 20 equiv of Trifluoroacetic acid (TFA).

## 5.2. Interaction of dye **9** with hydroxide anion

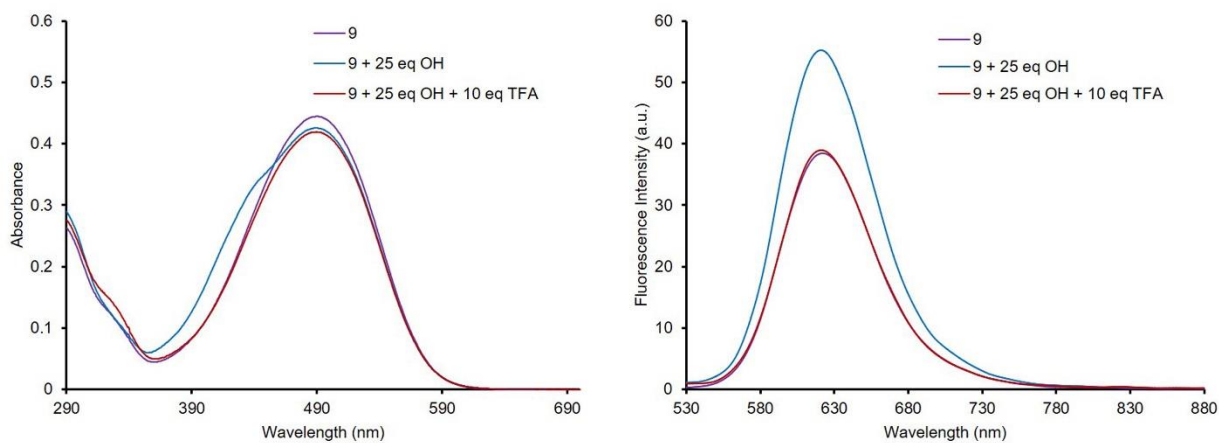

**Figure S75:** UV-Vis absorption (left) and Fluorescence (right) spectrum of dye **9** in DMSO while being treated with 25 equiv of Tetrabutylammonium hydroxide (TBAOH) and 10 equiv of Trifluoroacetic acid (TFA).

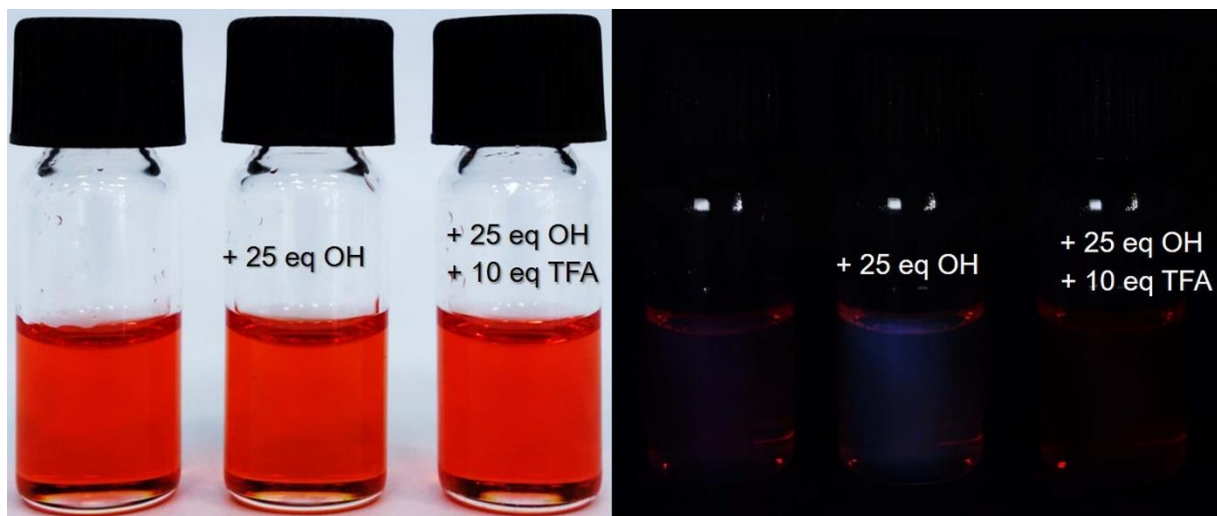

**Figure S76:** Photographs of dye **9** in DMSO under ambient light (left) and 365 nm UV lamp (right) while being treated with 25 equiv of Tetrabutylammonium hydroxide (TBAOH) and 10 equiv of Trifluoroacetic acid (TFA).

### 5.3. Interaction of dye **10** with hydroxide anion

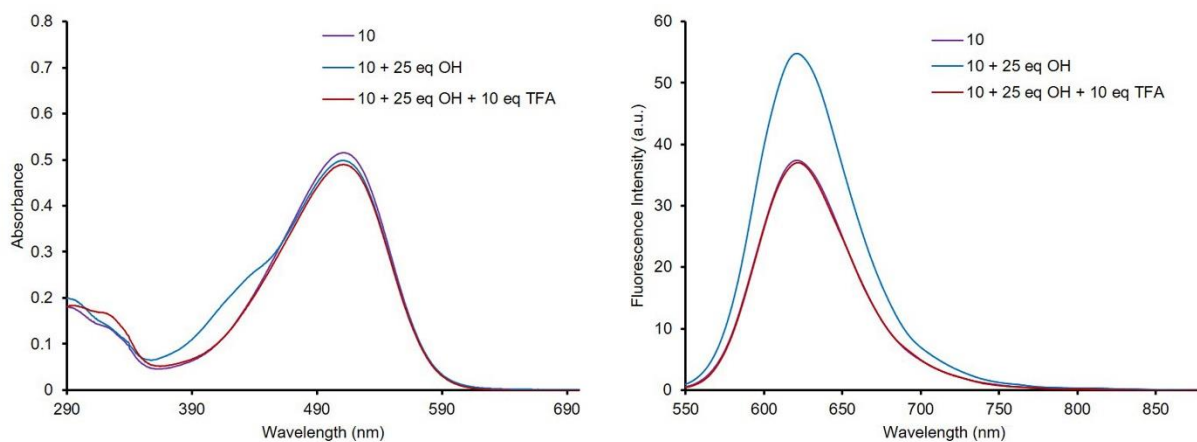

**Figure S77:** UV-Vis absorption (left) and Fluorescence (right) spectrum of dye **10** in DMSO while being treated with 25 equiv of Tetrabutylammonium hydroxide (TBAOH) and 10 equiv of Trifluoroacetic acid (TFA).



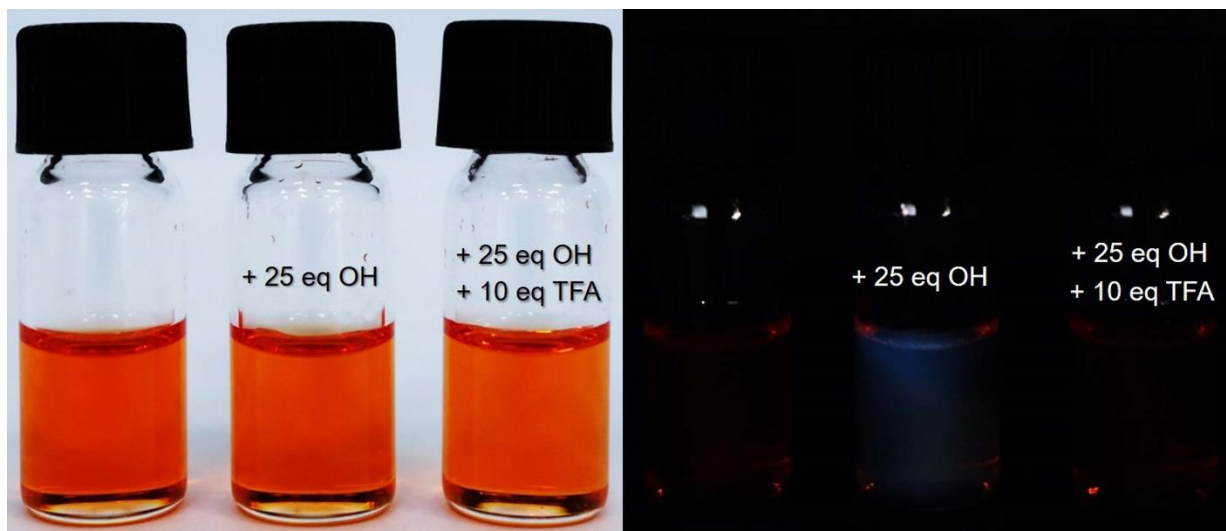

**Figure S78:** Photographs of dye **10** in DMSO under ambient light (left) and 365 nm UV lamp (right) while being treated with 25 equiv of Tetrabutylammonium hydroxide (TBAOH) and 10 equiv of Trifluoroacetic acid (TFA).

#### 5.4. Interaction of dye **11** with hydroxide anion

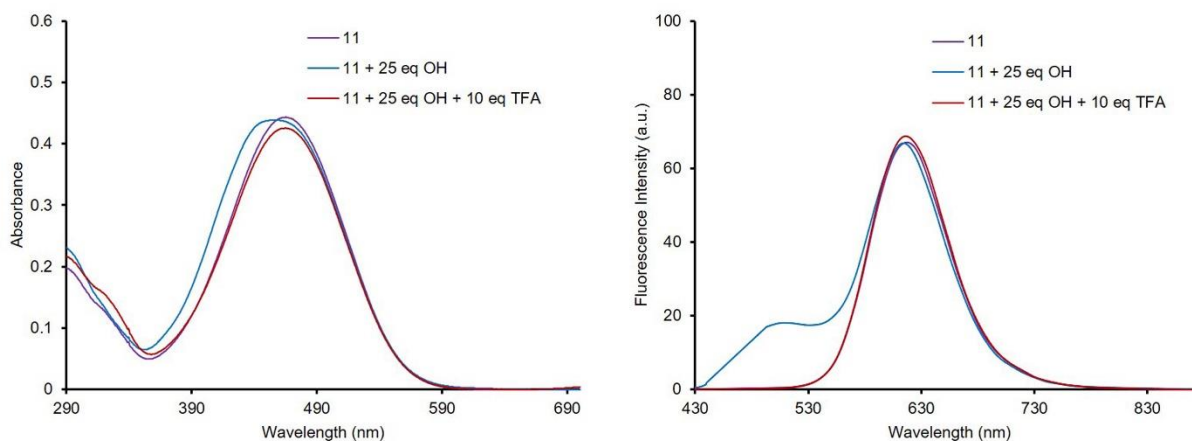

**Figure S79:** UV-Vis absorption (left) and Fluorescence (right) spectrum of dye **11** in DMSO while being treated with 25 equiv of Tetrabutylammonium hydroxide (TBAOH) and 10 equiv of Trifluoroacetic acid (TFA).

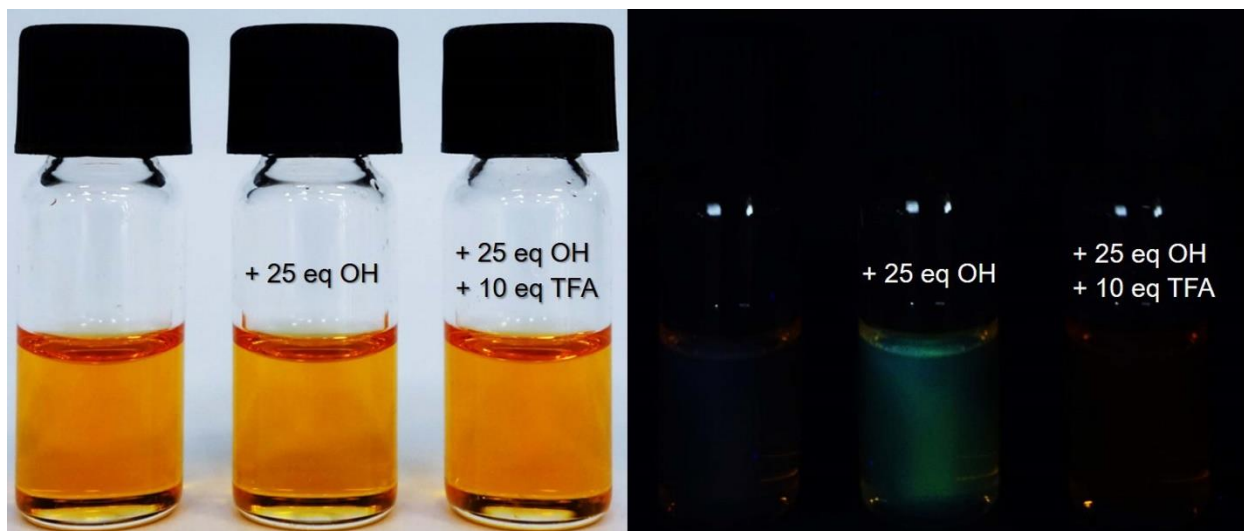

**Figure S80:** Photographs of dye **11** in DMSO under ambient light (left) and 365 nm UV lamp (right) while being treated with 25 equiv of Tetrabutylammonium hydroxide (TBAOH) and 10 equiv of Trifluoroacetic acid (TFA).

### 5.5. Interaction of dye **12** with hydroxide anion

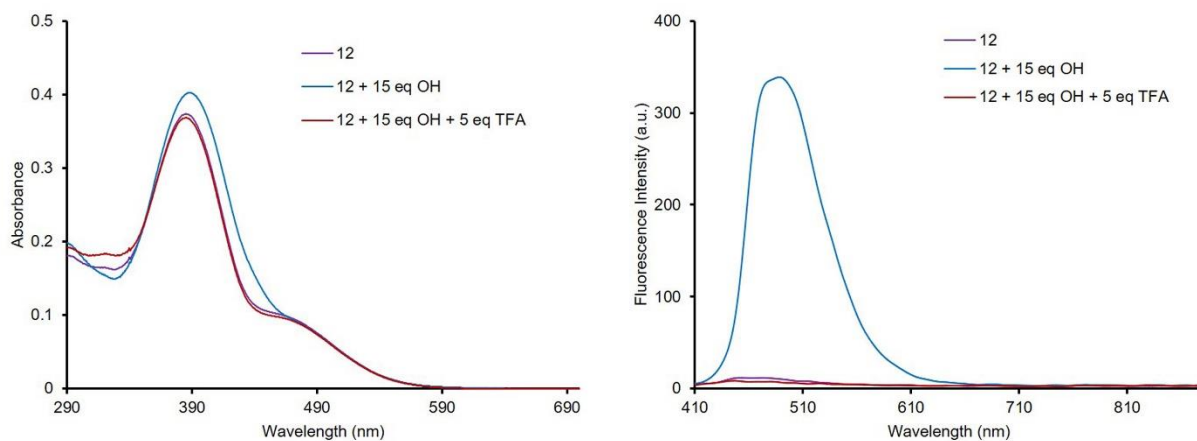

**Figure S81:** UV-Vis absorption (left) and Fluorescence (right) spectrum of dye **12** in DMSO while being treated with 15 equiv of Tetrabutylammonium hydroxide (TBAOH) and 5 equiv of Trifluoroacetic acid (TFA).

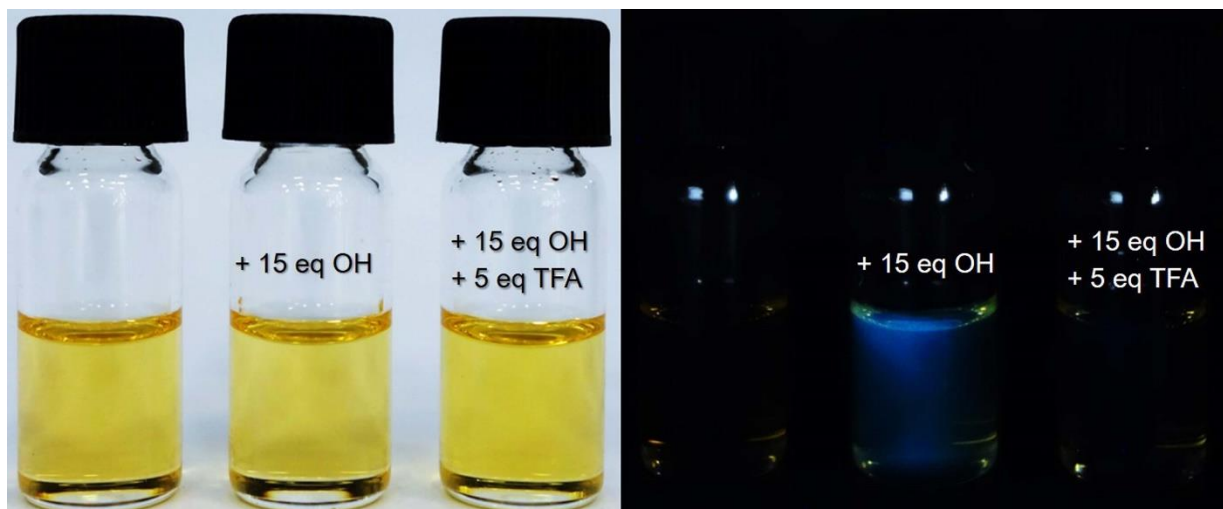

**Figure S82:** Photographs of dye **12** in DMSO under ambient light (left) and 365 nm UV lamp (right) while being treated with 15 equiv of Tetrabutylammonium hydroxide (TBAOH) and 5 equiv of Trifluoroacetic acid (TFA).

## 6. pKa calculation and pH properties of dye 8

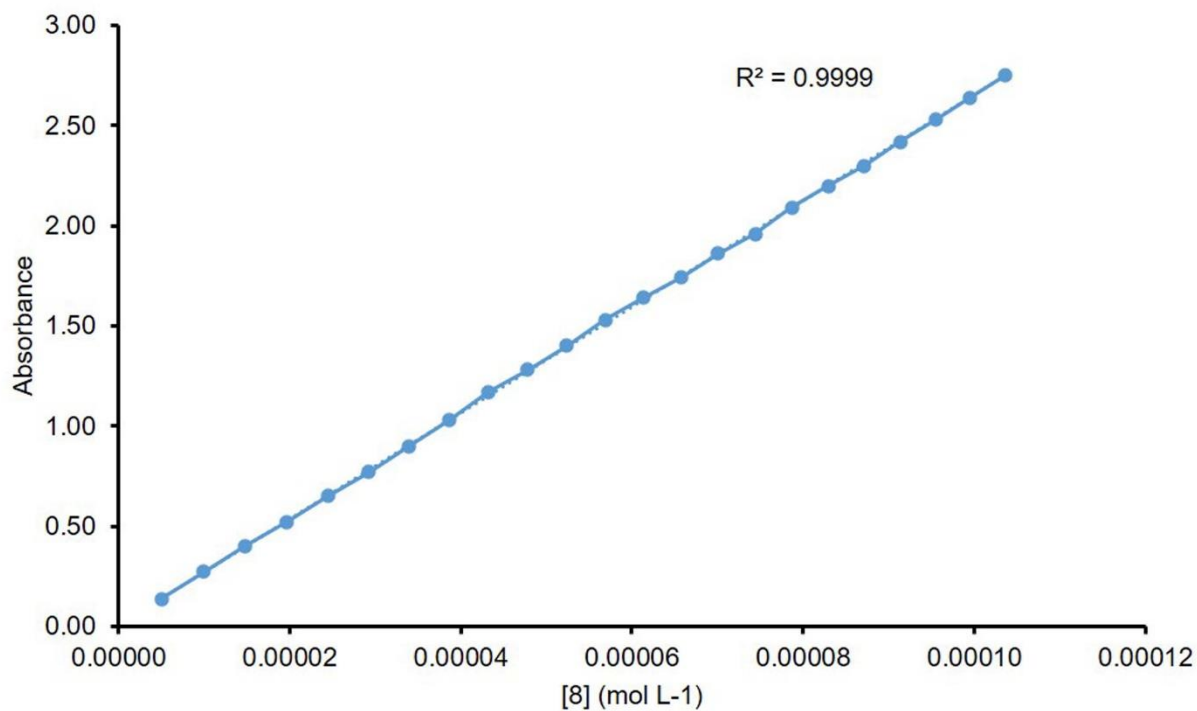

**Figure S83:** The calibration graph of dye **8** in water.

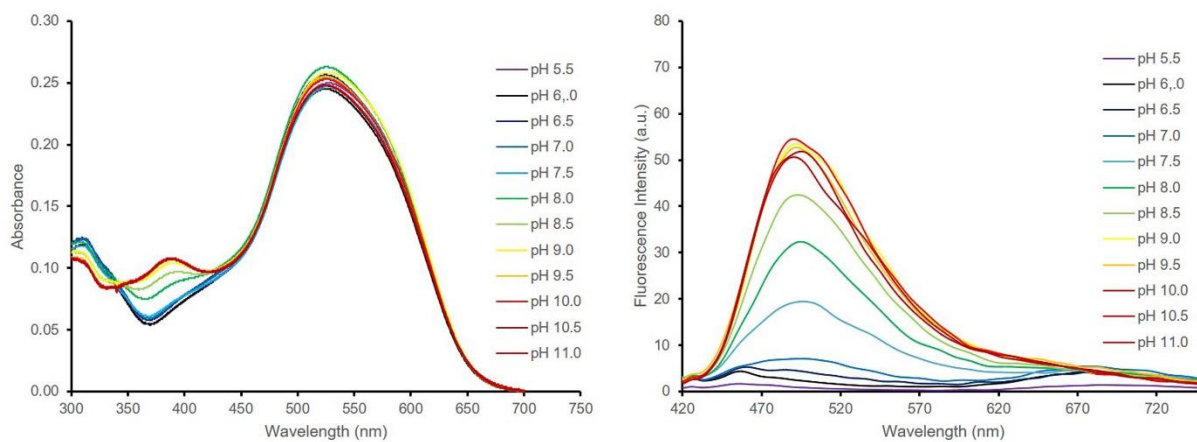

**Figure S84:** UV-Vis absorption (left) and Fluorescence (right) spectra of dye **8** in Britton-Robinson buffers with different pH values.

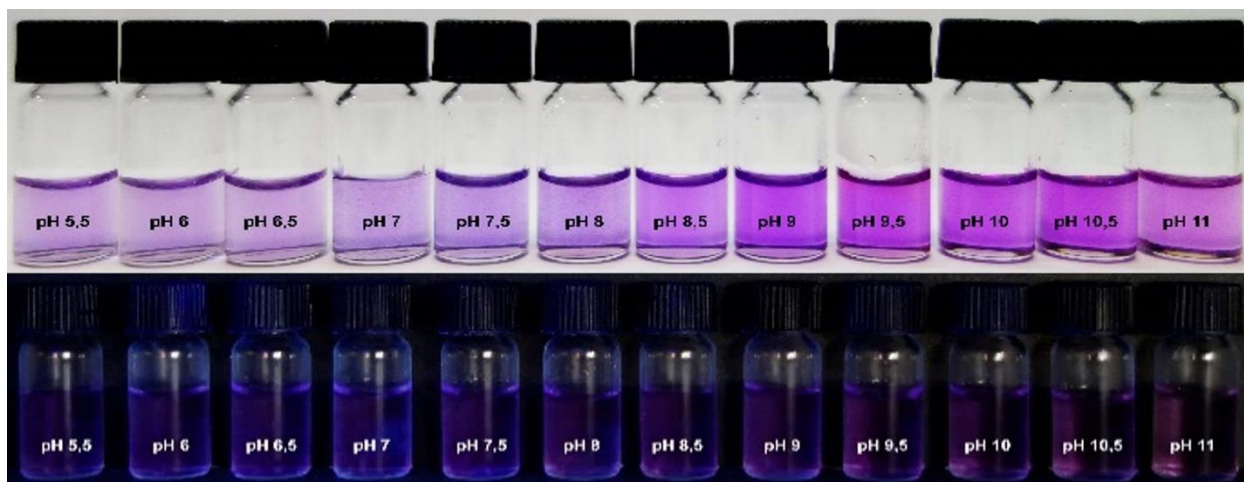

**Figure S85:** Photographs of dye **8** in Britton-Robinson buffers with different pH values .

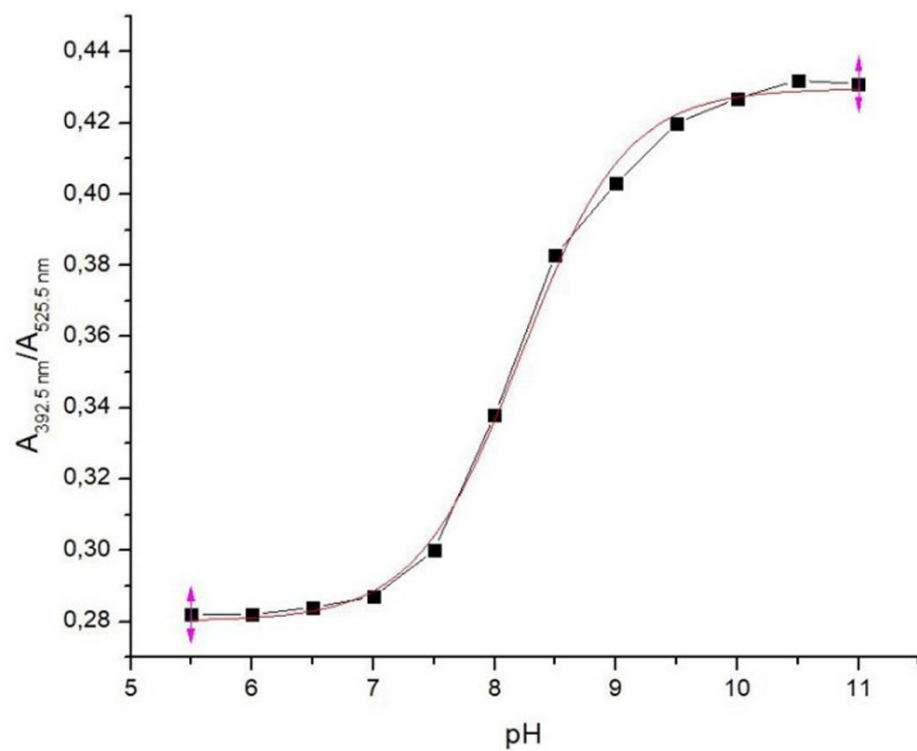

**Figure S86:** Sigmoid function obtained from dye **8** absorption spectra during pH investigation.

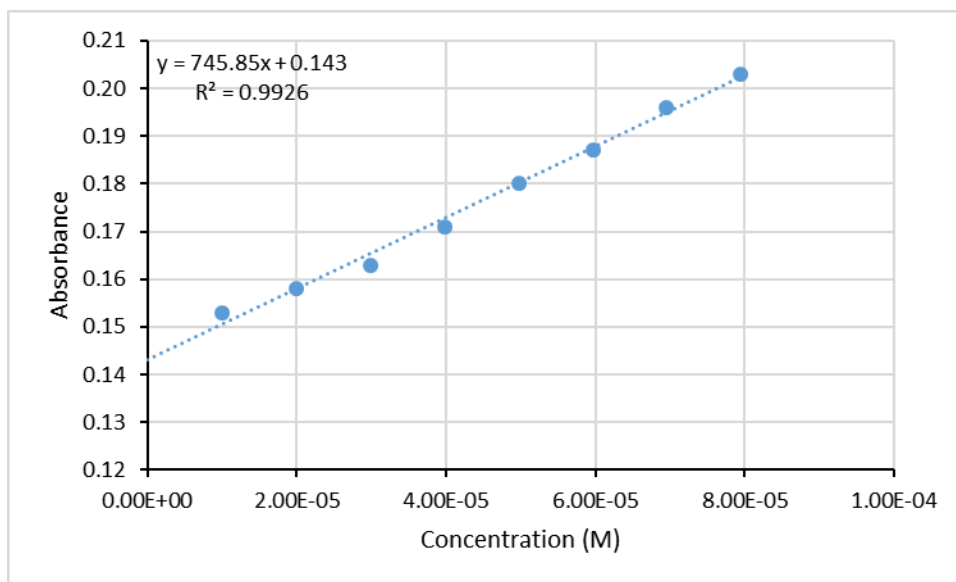

**Figure S87:** The absorbance calibration graph of OH<sup>-</sup> for dye **8** in DMSO.

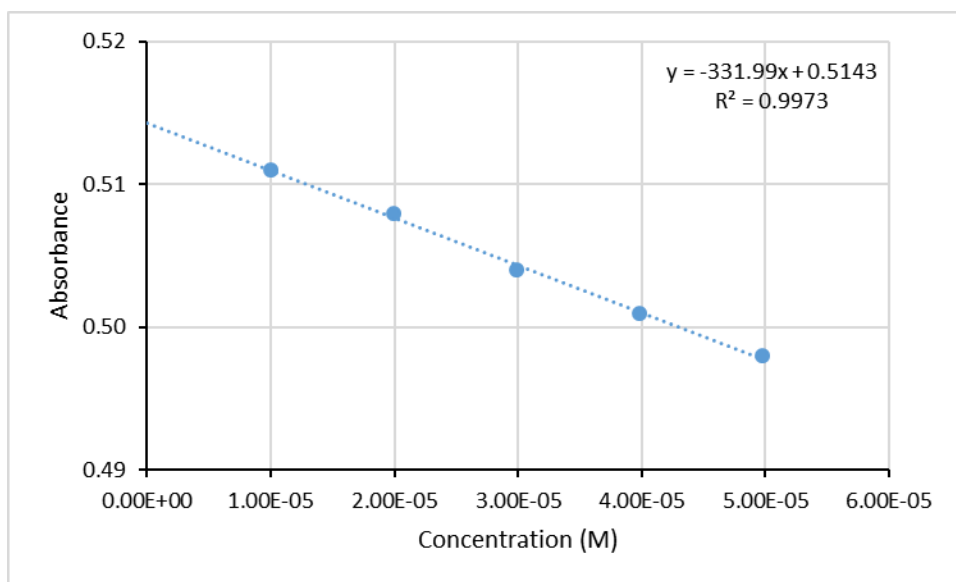

**Figure S88:** The absorbance calibration graph of OH<sup>-</sup> for dye **9** in DMSO.

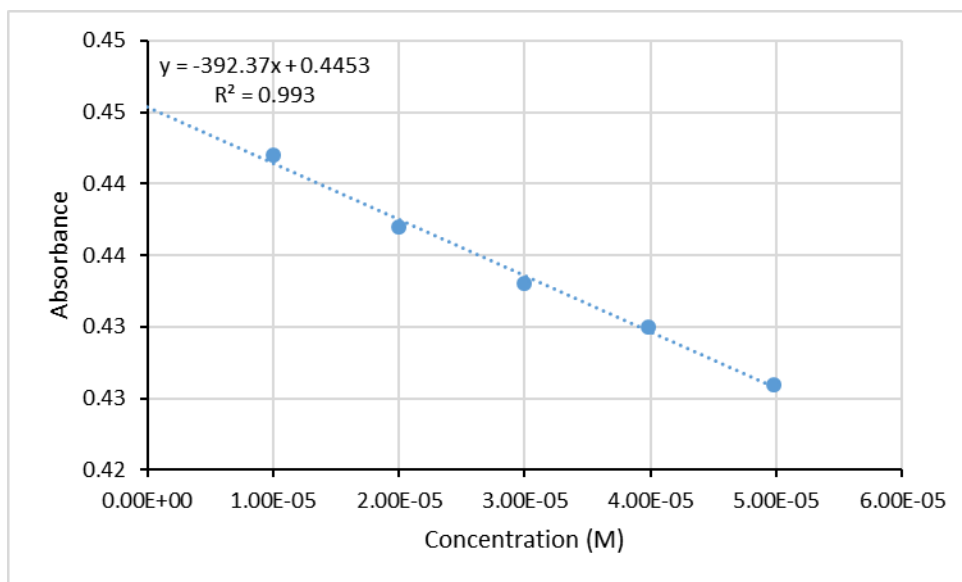

**Figure S89:** The absorbance calibration graph of OH<sup>-</sup> for dye **10** in DMSO.

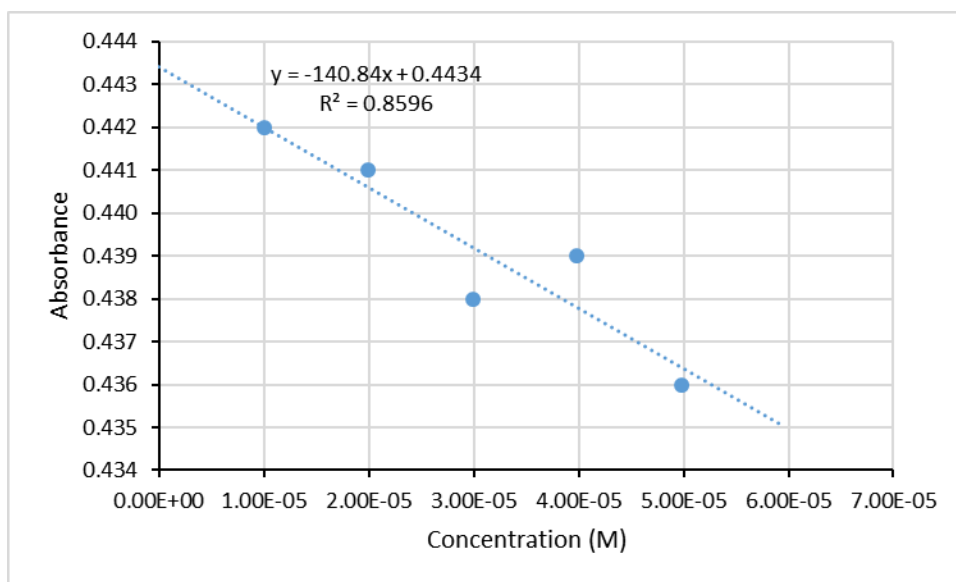

**Figure S90:** The absorbance calibration graph of OH<sup>-</sup> for dye **11** in DMSO.

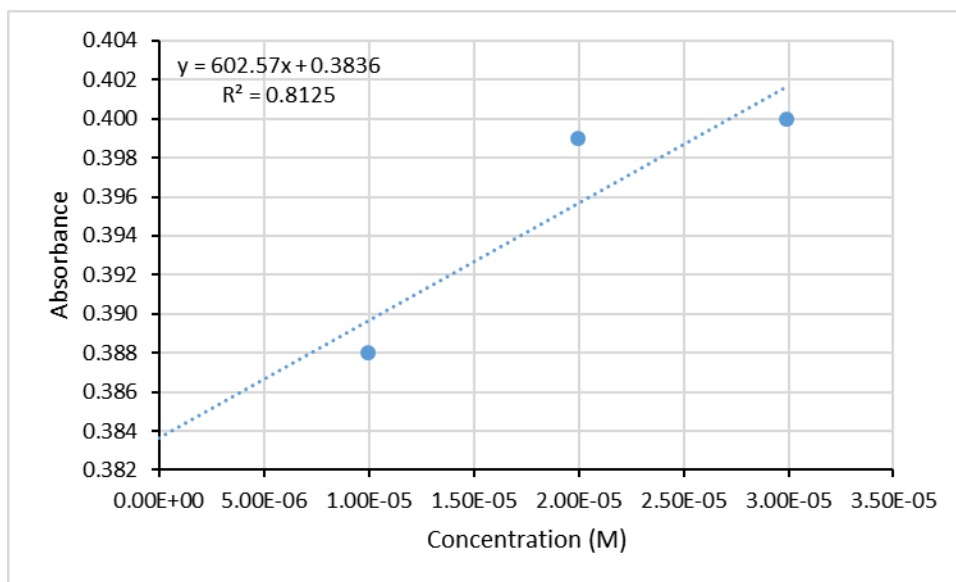

**Figure S91:** The absorbance calibration graph of OH<sup>-</sup> for dye **12** in DMSO.

## 7. The Frontier Orbitals of dyes 3–12

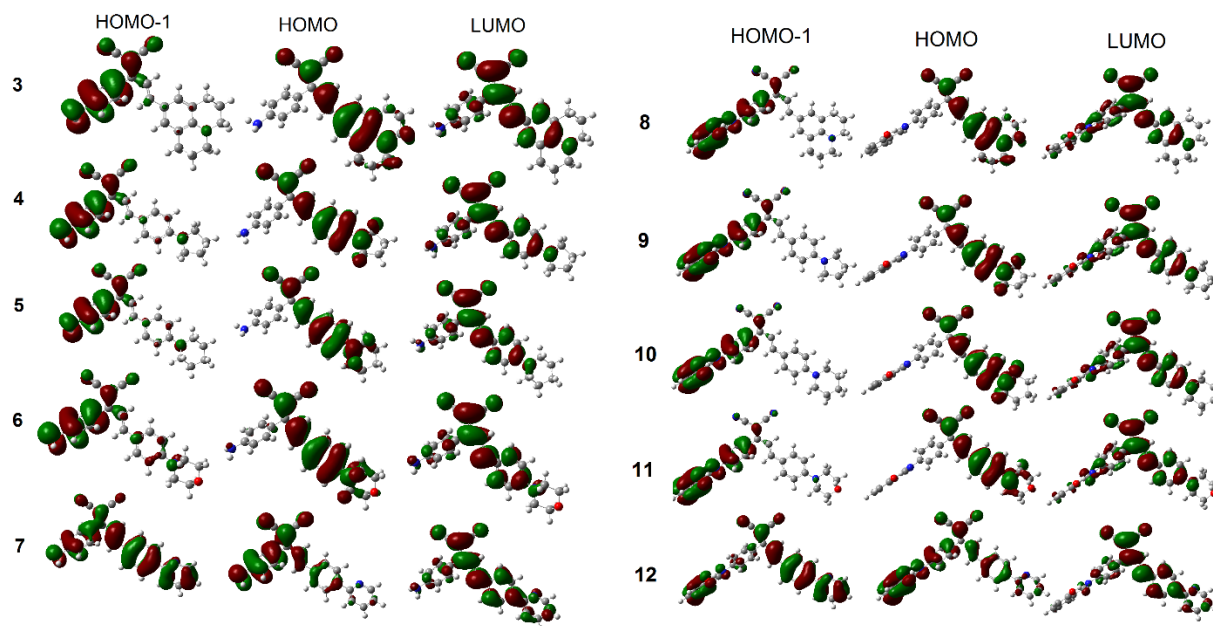

**Figure S92:** The frontier orbitals of dyes **3–7** and **8–12**.



## 8. The Calculated NLO Properties of dyes 3–12

**Table S2.** For dyes 3-7, the electric dipole moment ( $\mu$ ) and the first hyperpolarizability ( $\beta$ ) and their components calculated at B3LYP/6-31+G(d,p) level in  $\text{CHCl}_3$  phase for all molecules. The component values are in a.u.

|                                           | <b>3</b>     | <b>4</b>     | <b>5</b>     | <b>6</b>     | <b>7</b>     |
|-------------------------------------------|--------------|--------------|--------------|--------------|--------------|
| $\mu_x$                                   | 5.6926706    | 5.3691559    | 5.3873764    | -4.0010258   | -2.6429821   |
| $\mu_y$                                   | -5.0934748   | -4.9953649   | -4.9429526   | -4.8844605   | -5.5436563   |
| $\mu_z$                                   | -0.1588806   | -0.1860062   | -0.1252521   | 0.3016477    | 0.2053963    |
| <b><math>\mu</math> (D)</b>               | <b>19.42</b> | <b>18.65</b> | <b>18.59</b> | <b>16.07</b> | <b>15.62</b> |
| $\beta_{xxx}$                             | -42353.89934 | -40753.23502 | -43074.92636 | 39970.01067  | 18241.47831  |
| $\beta_{xyx}$                             | 9253.323169  | 8661.358561  | 8406.78102   | 8354.212588  | 5777.423659  |
| $\beta_{xyy}$                             | 4944.215718  | 5355.846317  | 5462.856917  | -5410.250701 | -5695.714921 |
| $\beta_{yyy}$                             | 2244.621108  | 2799.928022  | 2988.15785   | 3272.455142  | 4910.262606  |
| $\beta_{xxz}$                             | -138.7166433 | -59.3299487  | -32.4921614  | -91.5773624  | -82.1969544  |
| $\beta_{xyz}$                             | 21.9511138   | -28.6343988  | -144.6699602 | 224.7418672  | -43.7483347  |
| $\beta_{yyz}$                             | -210.1739704 | -188.6519652 | -261.2191842 | 106.0693994  | 73.8419203   |
| $\beta_{xzz}$                             | 85.295379    | 92.2381221   | 38.5383168   | -56.3878318  | -44.8895418  |
| $\beta_{yzz}$                             | -145.9765794 | -162.1035225 | -147.2250783 | -168.0835493 | -179.4030649 |
| $\beta_{zzz}$                             | -9.918861    | -16.035333   | -14.1630701  | 26.276116    | 13.6302135   |
| <b><math>\beta</math></b>                 | <b>337.1</b> | <b>320.3</b> | <b>338.9</b> | <b>314.1</b> | <b>141.1</b> |
| <b>(<math>\times 10^{-30}</math>) esu</b> |              |              |              |              |              |

**Table S3.** For dyes **8–12**, the electric dipole moment ( $\mu$ ) and the first hyperpolarizability ( $\beta$ ) and their components calculated at the B3LYP/6-31+G(d,p) level in  $\text{CHCl}_3$  phase. The component values are in a.u.

|                                                      | <b>8</b>     | <b>9</b>     | <b>10</b>    | <b>11</b>    | <b>12</b>    |
|------------------------------------------------------|--------------|--------------|--------------|--------------|--------------|
| $\mu_x$                                              | 3.7924911    | 3.7906052    | 3.4980186    | 3.3261378    | 1.2851961    |
| $\mu_y$                                              | -6.5693216   | -6.1665709   | -5.7320051   | -6.0617519   | -5.1738506   |
| $\mu_z$                                              | -1.0039384   | -0.9597765   | -0.7532799   | 0.2234769    | -1.3860644   |
| <b><math>\mu</math> (D)</b>                          | <b>19.45</b> | <b>18.56</b> | <b>17.18</b> | <b>17.59</b> | <b>14.00</b> |
| $\beta_{xxx}$                                        | -18930.84765 | -20156.66861 | -23576.99201 | -20567.67172 | -7081.453568 |
| $\beta_{xyy}$                                        | 21061.94446  | 21115.85202  | 22170.42169  | 20514.82425  | 14462.24417  |
| $\beta_{xyy}$                                        | -12080.54044 | -10108.34981 | -9362.886521 | -8803.794064 | -3542.006075 |
| $\beta_{yyy}$                                        | 5957.890881  | 4533.609379  | 4304.142003  | 3686.920776  | 3017.223993  |
| $\beta_{xxz}$                                        | -638.8925296 | -848.1828417 | -1279.140573 | 938.5067506  | -868.357574  |
| $\beta_{xyz}$                                        | -187.4450288 | -177.4661063 | 98.8794399   | -141.3188612 | -323.454651  |
| $\beta_{yyz}$                                        | -339.3493952 | -305.2196307 | -361.542821  | 22.4412112   | -249.4746136 |
| $\beta_{xzz}$                                        | -106.6930768 | -79.2209604  | 71.6384865   | -28.5927489  | -124.9090923 |
| $\beta_{yzz}$                                        | -254.0791918 | -276.116813  | -377.5483294 | -257.0611126 | -253.9652693 |
| $\beta_{zzz}$                                        | -239.3627572 | -230.7984379 | -37.3557272  | 26.6287166   | -245.8979212 |
| <b><math>\beta(\times 10^{-30})</math><br/>(esu)</b> | <b>354.8</b> | <b>341.9</b> | <b>362.9</b> | <b>327.7</b> | <b>175.8</b> |

## References

1. Reichardt, C. *Chem. Rev.* **1994**, *94* (8), 2319–2358. doi:10.1021/cr00032a005.
